# Supplementary material for: Identification and clinical implications of immune-related hub genes in psoriasis
Source: PLoS One. 2026 Apr 20;21(4):e0347536. doi: 10.1371/journal.pone.0347536 (PMC13095007; doi:10.1371/journal.pone.0347536)
Supplement: S2 Table — (XLSX) [file pone.0347536.s003.xlsx]

## Sheet: Table_2_Supp
Table S2 3,281 differential genes were identified.
Gene name	logFC	AveExpr	t	P.Value	adj.P.Val	B
S100A12	9.41958	7.39742	59.175	8.54176e-189	1.75508e-184	421.19
KYNU	4.13341	5.63413	51.5666	2.31048e-169	2.37367e-165	376.794
TMPRSS11D	7.19224	6.49144	50.759	3.58463e-167	2.45511e-163	371.782
SERPINB4	9.49315	8.79428	47.2574	2.31987e-157	1.19166e-153	349.325
SPRR2C	7.82159	7.53844	46.1247	4.4903e-154	1.84524e-150	341.797
TCN1	8.4695	7.31465	45.3468	8.77118e-152	3.00369e-148	336.549
PRSS27	5.65347	6.8883	44.4402	4.44226e-149	1.30393e-145	330.351
VNN3	2.39119	3.55099	41.9697	1.63652e-141	4.20319e-138	313.007
HYAL4	5.02997	6.5308	40.9614	2.43924e-138	5.56878e-135	305.73
S100A7A	6.7259	9.71433	40.0448	2.0704e-135	4.25405e-132	299.012
TGM1	4.84157	8.12383	39.7686	1.60969e-134	3.00676e-131	296.968
OASL	6.37713	5.79881	39.5869	6.23767e-134	1.06805e-130	295.619
SERPINB13	3.05923	6.97889	39.2	1.1296e-132	1.78538e-129	292.733
GZMB	5.5637	5.65804	38.3944	4.98112e-130	7.3105e-127	286.665
KLK13	5.05484	5.93706	37.655	1.42585e-127	1.95313e-124	281.027
CLEC7A	1.92432	5.40587	37.5102	4.35037e-127	5.58669e-124	279.915
ATP12A	7.08257	7.19022	37.4698	5.94281e-127	7.18276e-124	279.605
ZC3H12A	4.23464	8.87851	37.1901	5.16955e-126	5.90104e-123	277.448
SAMD9	4.06527	8.05002	36.8457	7.51625e-125	8.12823e-122	274.78
RGS20	2.39381	4.77868	36.8195	9.21528e-125	9.46732e-122	274.577
GJB2	2.18898	13.3731	36.7443	1.65772e-124	1.62196e-121	273.991
FLVCR2	2.2798	5.73312	36.7083	2.1949e-124	2.04993e-121	273.712
SERPINB3	6.09454	10.8072	36.4875	1.23495e-123	1.10324e-120	271.989
RHCG	6.17212	8.35399	36.4733	1.38021e-123	1.18164e-120	271.879
CD274	2.8138	4.70756	36.4504	1.65162e-123	1.35743e-120	271.7
ARNTL2	3.89327	7.52752	36.4339	1.88016e-123	1.48583e-120	271.57
FUT3	2.08845	4.52445	36.3587	3.39233e-123	2.58156e-120	270.982
PLA2G4D	5.19003	5.27366	36.1532	1.70878e-122	1.25394e-119	269.37
UBE2F	1.69229	10.0077	36.0543	3.72556e-122	2.63963e-119	268.593
VNN1	5.00326	7.114	36.049	3.88641e-122	2.66181e-119	268.551
ARSF	4.74083	7.86213	36.0264	4.64467e-122	3.07852e-119	268.373
AKR1B10	6.67905	9.36796	35.969	7.30994e-122	4.69367e-119	267.921
PI3	4.08388	12.7535	35.8714	1.58135e-121	9.84605e-119	267.152
MPZL2	2.27477	9.9936	35.5332	2.31373e-120	1.39824e-117	264.476
INA	4.65744	6.15379	34.6825	2.10504e-117	1.23578e-114	257.682
KRT16	3.48992	12.5603	34.6063	3.89255e-117	2.22167e-114	257.069
GINS3	1.50897	8.81172	34.5574	5.77301e-117	3.20589e-114	256.676
FOXE1	2.50567	3.81021	34.5004	9.15338e-117	4.94933e-114	256.217
CD24	1.94926	12.4652	34.3154	4.09373e-116	2.15677e-113	254.723
MX1	3.19344	10.4717	34.2374	7.70429e-116	3.9575e-113	254.092
FAM110C	1.74605	11.4609	34.0934	2.48402e-115	1.24486e-112	252.925
FAM43A	1.36838	5.85513	33.9529	7.79408e-115	3.81298e-112	251.784
TMC5	2.4437	4.72883	33.9233	9.92322e-115	4.74168e-112	251.543
HPSE	4.69223	7.9649	33.8519	1.77812e-114	8.3034e-112	250.962
ABCC1	1.06077	8.87643	33.6551	8.88985e-114	4.0315e-111	249.357
GDA	5.90159	8.34442	33.6532	9.0256e-114	4.0315e-111	249.341
SLC26A9	4.6583	8.04704	33.477	3.82991e-113	1.67432e-110	247.9
GBAP1	1.76665	11.3213	33.0559	1.23007e-111	5.26546e-109	244.439
BCAR3	-2.75128	6.52253	-33.0527	1.26247e-111	5.29385e-109	244.413
EPSTI1	3.69956	7.26828	32.9625	2.66302e-111	1.09434e-108	243.669
RAB5IF	1.32291	11.9581	32.9418	3.15984e-111	1.27304e-108	243.498
GJB6	1.50025	13.297	32.8799	5.27908e-111	2.08595e-108	242.986
NLRX1	2.27599	7.85011	32.8688	5.78726e-111	2.22835e-108	242.895
TLE3	1.96786	8.58136	32.8673	5.85637e-111	2.22835e-108	242.883
CHRNA9	4.82691	5.49511	32.7547	1.4906e-110	5.56861e-108	241.951
RAB27A	2.11796	9.42859	32.4911	1.33636e-109	4.90325e-107	239.763
PPARD	1.27862	5.49325	32.4455	1.955e-109	7.04725e-107	239.383
IL36G	5.48797	10.3427	32.4175	2.46931e-109	8.74774e-107	239.15
FAM83A	2.71409	4.6959	32.4134	2.55414e-109	8.89489e-107	239.117
S100A9	5.51603	11.9227	32.3808	3.35482e-109	1.14886e-106	238.845
OAS2	3.13539	5.47286	32.3549	4.16201e-109	1.40192e-106	238.63
FCHSD1	3.17812	5.81395	32.266	8.75432e-109	2.86809e-106	237.888
PLBD1	2.1749	9.0625	32.2655	8.79396e-109	2.86809e-106	237.883
HERC6	2.01767	5.9509	32.225	1.23313e-108	3.95892e-106	237.546
WNT5A	2.65397	9.5251	32.0799	4.16155e-108	1.3155e-105	236.333
CCL20	5.71884	5.68921	32.0767	4.27217e-108	1.33e-105	236.306
CXCR2	3.26965	7.8053	32.062	4.83426e-108	1.48253e-105	236.183
UPP1	3.40827	8.93536	31.9496	1.2425e-107	3.75437e-105	235.241
C12orf56	3.64671	5.48974	31.9229	1.55568e-107	4.63255e-105	235.017
PRKCQ	2.93224	3.80413	31.7751	5.39663e-107	1.58407e-104	233.776
JADE1	-1.97057	7.03407	-31.7476	6.80321e-107	1.96881e-104	233.545
PNP	2.37406	9.6072	31.6026	2.31199e-106	6.59783e-104	232.325
PGLYRP4	3.60034	7.76197	31.3927	1.36566e-105	3.84386e-103	230.553
ADAP2	2.81083	7.23404	31.3493	1.97334e-105	5.47922e-103	230.185
IGFL1	5.53271	7.16	31.2614	4.15799e-105	1.13912e-102	229.442
STAT1	2.30426	9.34213	31.2266	5.58698e-105	1.51047e-102	229.147
GFOD2	1.6241	7.17111	31.2245	5.68867e-105	1.51799e-102	229.129
CDK5R1	1.08366	5.42724	31.1309	1.26084e-104	3.32133e-102	228.335
BCL2A1	3.60173	5.86012	31.0125	3.45391e-104	8.98323e-102	227.33
GPR68	1.22905	6.11377	30.9179	7.73813e-104	1.98744e-101	226.525
SOX7	1.99647	8.33505	30.6339	8.77938e-103	2.22704e-100	224.101
RDH16	2.78087	4.72177	30.5479	1.83486e-102	4.59766e-100	223.366
SLC6A14	2.79982	11.452	30.5338	2.07047e-102	5.12553e-100	223.245
LINC01094	3.29889	5.11001	30.4951	2.88682e-102	7.06138e-100	222.914
TMPRSS4	4.69489	6.3391	30.4908	2.99446e-102	7.23849e-100	222.877
GBA	2.68746	8.411	30.4563	4.02603e-102	9.61893e-100	222.582
RRM2	3.30846	9.42403	30.4369	4.75851e-102	1.12383e-99	222.415
OAS1	3.68189	9.11261	30.4034	6.34498e-102	1.48148e-99	222.128
MPHOSPH6	1.66352	7.85239	30.3481	1.02072e-101	2.35649e-99	221.653
KRT77	-2.49424	12.1164	-30.3277	1.21639e-101	2.77703e-99	221.478
GTF3C6	1.03324	10.8898	30.2967	1.5892e-101	3.58826e-99	221.212
CRABP2	1.85455	12.4206	30.2141	3.23683e-101	7.22904e-99	220.502
BLNK	1.34272	10.4451	29.7484	1.81783e-99	4.01622e-97	216.482
N4BP1	1.14574	9.47823	29.7344	2.05173e-99	4.48478e-97	216.361
TTC39A	0.995068	4.5453	29.7134	2.46183e-99	5.32455e-97	216.18
ID4	-0.978371	8.0267	-29.6946	2.8992e-99	6.20519e-97	216.016
CCNE1	1.25506	5.35592	29.6648	3.75349e-99	7.95081e-97	215.759
DEFB103B	2.87574	8.07245	29.6161	5.73481e-99	1.20238e-96	215.336
LRP8	2.40002	5.91155	29.5459	1.05599e-98	2.19166e-96	214.726
MICALL1	1.82449	10.8011	29.4696	2.05187e-98	4.21597e-96	214.064
IRF7	2.77997	8.4242	29.456	2.30993e-98	4.69923e-96	213.945
HELZ2	0.819901	2.87525	29.4053	3.59206e-98	7.23588e-96	213.505
NT5C3A	1.87547	11.2939	29.3908	4.0783e-98	8.13561e-96	213.378
OTUB2	1.996	5.64426	29.3293	6.97283e-98	1.3776e-95	212.843
NAMPT	2.28578	8.9676	29.3259	7.18389e-98	1.40578e-95	212.813
MTURN	-0.658081	6.7325	-29.2781	1.08997e-97	2.11279e-95	212.397
GDPD3	2.37941	10.4048	29.2509	1.38328e-97	2.65629e-95	212.159
RABIF	1.47395	6.63293	29.1846	2.46771e-97	4.69481e-95	211.582
CCNA2	2.13482	8.15499	29.0849	5.90814e-97	1.11371e-94	210.71
FABP5	1.53341	14.1969	29.0656	6.99649e-97	1.30688e-94	210.542
GM2A	2.31991	7.59575	28.9962	1.28492e-96	2.36253e-94	209.935
DLGAP5	3.38352	7.03328	28.996	1.28779e-96	2.36253e-94	209.933
LYN	2.02745	6.58983	28.849	4.67875e-96	8.50746e-94	208.645
GALNT6	3.06974	6.65541	28.8308	5.49204e-96	9.89868e-94	208.485
SFT2D2	1.55415	9.85056	28.7359	1.26439e-95	2.25907e-93	207.653
TYMP	2.04977	4.37428	28.6978	1.76809e-95	3.13181e-93	207.319
SPTLC2	1.99647	6.9016	28.6819	2.0353e-95	3.5743e-93	207.178
RTP4	3.89907	5.01515	28.6146	3.68219e-95	6.4117e-93	206.586
OAS3	2.08473	6.10703	28.5981	4.25658e-95	7.34957e-93	206.442
NOD2	2.24633	10.3844	28.5585	6.03511e-95	1.03336e-92	206.093
MXD1	2.03343	8.40116	28.5293	7.81019e-95	1.32625e-92	205.836
ADAMDEC1	4.98786	6.49437	28.4927	1.07941e-94	1.81791e-92	205.513
PGM2	1.58588	10.7116	28.4916	1.0891e-94	1.81933e-92	205.504
SHOC1	2.35571	4.14071	28.4659	1.36655e-94	2.2644e-92	205.278
VMP1	1.73412	9.98023	28.4258	1.94847e-94	3.20282e-92	204.924
EPHB2	1.73458	3.67866	28.3762	3.02104e-94	4.92646e-92	204.486
CCNB1	2.781	7.38249	28.3685	3.2329e-94	5.23043e-92	204.418
SLC7A11	2.00463	5.11545	28.3669	3.28061e-94	5.26614e-92	204.404
STIL	1.40121	9.41247	28.3528	3.715e-94	5.91722e-92	204.28
RAB10	0.884716	12.3705	28.3488	3.84937e-94	6.08408e-92	204.244
ARPC5L	0.741599	9.84194	28.3083	5.5072e-94	8.6379e-92	203.887
KLK10	3.37272	9.45327	28.3005	5.89933e-94	9.18285e-92	203.818
RORC	-0.986181	2.95754	-28.2809	7.02224e-94	1.08486e-91	203.644
APOL6	2.11478	7.03642	28.2283	1.11865e-93	1.71529e-91	203.179
CIRBP	-0.860752	11.8429	-28.2005	1.43136e-93	2.17852e-91	202.933
HMOX2	1.39584	8.16292	28.1981	1.46143e-93	2.20795e-91	202.913
TRIM14	1.05824	6.08109	28.165	1.96024e-93	2.93993e-91	202.62
SLAMF7	1.66378	4.31939	28.158	2.08585e-93	3.10565e-91	202.558
PARP9	2.19012	8.31891	28.1377	2.49721e-93	3.69138e-91	202.378
DSC2	3.39841	7.51502	28.0989	3.52301e-93	5.17053e-91	202.034
FUT2	1.40532	5.18117	28.062	4.88803e-93	7.123e-91	201.708
XDH	2.50276	4.17779	28.0317	6.39686e-93	9.25608e-91	201.439
CARHSP1	1.01446	5.46586	27.9587	1.22428e-92	1.75911e-90	200.791
RABGGTA	2.18149	7.33086	27.9534	1.28286e-92	1.83048e-90	200.745
AFAP1L2	1.34873	10.0311	27.9263	1.63253e-92	2.31335e-90	200.504
TMEM45B	2.64942	10.6201	27.9205	1.72019e-92	2.42087e-90	200.452
KCNJ15	1.60767	3.84096	27.8101	4.59314e-92	6.42009e-90	199.472
DEPDC1B	3.12585	5.72928	27.7709	6.5182e-92	9.04929e-90	199.122
IRAK2	0.720881	4.76371	27.6357	2.1773e-91	3.00249e-89	197.919
CYP7B1	2.24614	3.90954	27.5906	3.25597e-91	4.46002e-89	197.517
PRKCQ-AS1	1.3121	3.83595	27.5527	4.56964e-91	6.21804e-89	197.179
SCO2	3.07357	10.1865	27.5373	5.24569e-91	7.09099e-89	197.041
RSAD2	4.70151	7.39101	27.5159	6.34803e-91	8.52503e-89	196.851
UBE2L6	1.5117	11.2143	27.3986	1.81368e-90	2.41985e-88	195.803
WDR77	1.06383	9.22088	27.3608	2.54439e-90	3.37287e-88	195.465
EPN3	1.96787	9.98415	27.3321	3.29255e-90	4.33667e-88	195.208
RHOBTB3	-1.0242	4.86617	-27.2912	4.7486e-90	6.21462e-88	194.842
SH3PXD2A-AS1	3.22312	9.16806	27.2405	7.48711e-90	9.73656e-88	194.388
PTTG1	1.61428	11.177	27.2228	8.77697e-90	1.13422e-87	194.229
CXCL1	5.70408	5.42565	27.1813	1.27418e-89	1.63628e-87	193.857
CHAC1	4.46997	4.87028	27.1325	1.97387e-89	2.51908e-87	193.42
EPOP	3.38261	6.05125	27.0646	3.63529e-89	4.61077e-87	192.811
SKA2	1.01511	9.81546	27.0302	4.95623e-89	6.24032e-87	192.501
LCN2	5.61959	10.1864	27.0296	4.98084e-89	6.24032e-87	192.496
RAB27B	1.82982	7.50467	27.0232	5.2786e-89	6.5733e-87	192.438
NMI	1.18712	10.8326	26.9185	1.35416e-88	1.67614e-86	191.498
NETO2	2.99366	4.69963	26.831	2.9814e-88	3.6682e-86	190.71
ZBTB20	-1.15793	8.44482	-26.8178	3.35863e-88	4.10773e-86	190.591
DSG3	2.30432	10.2094	26.6336	1.77377e-87	2.15654e-85	188.93
UCHL3	1.18828	12.2486	26.6183	2.03569e-87	2.46043e-85	188.793
GBP1	1.9332	7.40355	26.5758	2.99011e-87	3.59285e-85	188.409
JMJD7-PLA2G4B	1.18065	9.03684	26.5736	3.05077e-87	3.64443e-85	188.389
PLAGL2	2.01804	6.50654	26.5698	3.15706e-87	3.7496e-85	188.355
CDK1	2.27298	6.40426	26.5668	3.2445e-87	3.8313e-85	188.327
TTC9	2.92078	6.19395	26.5495	3.79607e-87	4.45702e-85	188.171
WDR53	1.45558	9.43232	26.5453	3.94316e-87	4.60341e-85	188.133
ISG20	2.76225	5.19927	26.5177	5.06054e-87	5.87451e-85	187.884
MELK	2.88199	6.53295	26.5107	5.39016e-87	6.222e-85	187.821
CLDN8	-2.96442	8.74437	-26.4771	7.31204e-87	8.39332e-85	187.516
ISG15	3.91495	9.18443	26.4028	1.43346e-86	1.63629e-84	186.845
POLR3G	1.11803	5.95564	26.3562	2.18762e-86	2.48337e-84	186.423
KPNA2	1.12384	11.1993	26.2812	4.32282e-86	4.88027e-84	185.743
AMOTL1	1.06374	7.87899	26.1781	1.10259e-85	1.23797e-83	184.808
PLCXD1	0.876047	7.05881	26.1607	1.29187e-85	1.44261e-83	184.65
KCNK6	1.49263	10.1241	26.1259	1.77344e-85	1.96967e-83	184.334
TEX101	3.39497	6.5963	26.076	2.79066e-85	3.08277e-83	183.881
CKAP4	0.748056	8.4537	26.0751	2.81444e-85	3.09243e-83	183.873
SLC5A1	3.65226	7.57477	26.0224	4.54734e-85	4.96991e-83	183.394
KRT6A	2.01786	13.276	26	5.57579e-85	6.06168e-83	183.19
CENPN	1.67339	4.96619	25.9519	8.64441e-85	9.34825e-83	182.753
GK3P	2.87594	4.98114	25.8882	1.5459e-84	1.66302e-82	182.172
CARD6	2.83544	9.59383	25.8597	2.00443e-84	2.14506e-82	181.913
MYD88	1.19722	11.3749	25.7235	6.95544e-84	7.40484e-82	180.671
ARL5B	1.54475	7.7341	25.6953	9.00243e-84	9.53469e-82	180.414
LINC01550	-1.29186	3.23671	-25.693	9.19386e-84	9.6875e-82	180.393
PSMC4	0.911566	11.5286	25.6796	1.03858e-83	1.08876e-81	180.271
PGBD5	3.16454	3.77592	25.6295	1.64333e-83	1.71399e-81	179.813
RGS1	2.22607	4.66265	25.5952	2.24789e-83	2.3327e-81	179.5
MKI67	2.61861	4.82803	25.5672	2.90517e-83	2.99963e-81	179.244
PPIF	2.30304	10.2932	25.5623	3.04031e-83	3.12346e-81	179.199
CHI3L2	4.07924	8.97172	25.5589	3.13491e-83	3.20463e-81	179.168
WWTR1	1.39212	9.56282	25.5159	4.64724e-83	4.72707e-81	178.775
HSPE1	0.819509	11.0357	25.4551	8.11376e-83	8.21248e-81	178.219
IL36B	1.47414	3.29053	25.4538	8.21274e-83	8.27192e-81	178.207
IL36RN	2.85274	12.4096	25.4446	8.93941e-83	8.95991e-81	178.122
RPL26L1	0.757337	11.6189	25.3771	1.65901e-82	1.65475e-80	177.505
HBEGF	1.56072	4.63342	25.3216	2.76325e-82	2.74283e-80	176.996
CRIP1	-1.63686	12.3126	-25.294	3.55838e-82	3.51509e-80	176.743
SERPINA1	1.89985	4.05686	25.2402	5.83542e-82	5.72276e-80	176.25
HDAC1	0.691141	11.8439	25.2335	6.20305e-82	6.04048e-80	176.189
RETREG1	-1.44502	6.56658	-25.2313	6.32957e-82	6.1346e-80	176.169
BTC	-3.79847	4.58529	-25.2159	7.293e-82	7.03517e-80	176.027
ZNF790-AS1	-1.36936	4.96951	-25.1621	1.19659e-81	1.14889e-79	175.533
SERPINB1	1.1303	8.56988	25.1066	1.99342e-81	1.90506e-79	175.023
PRDM1	1.50014	8.17282	25.1011	2.09708e-81	1.99485e-79	174.973
TIGAR	2.87992	8.22824	25.0962	2.19391e-81	2.07734e-79	174.928
CMPK2	2.92206	9.40872	25.073	2.71685e-81	2.56069e-79	174.714
FBXO6	2.39245	7.25073	25.07	2.79108e-81	2.61864e-79	174.687
APOL1	2.56513	9.23171	25.0577	3.12526e-81	2.91885e-79	174.575
KIF20A	3.00725	5.64754	25.0364	3.80247e-81	3.53527e-79	174.379
A2ML1	2.58185	9.28424	25.0257	4.19844e-81	3.88583e-79	174.28
SMAGP	1.56729	9.45051	25.0109	4.80951e-81	4.43143e-79	174.144
GRHL3	2.44999	8.882	24.9986	5.38936e-81	4.94353e-79	174.031
CASP1	1.32874	9.28036	24.927	1.0425e-80	9.52015e-79	173.372
FBXO45	2.90883	8.02331	24.9173	1.14015e-80	1.03658e-78	173.283
PRSS2	1.89796	8.8748	24.9151	1.16333e-80	1.05299e-78	173.263
SHB	1.4235	6.19577	24.9054	1.27218e-80	1.14647e-78	173.173
IFIT3	2.20261	7.72342	24.8591	1.9506e-80	1.75018e-78	172.747
DUOXA1	1.6468	9.17791	24.8388	2.35216e-80	2.0922e-78	172.56
ULBP2	2.37321	5.29411	24.8359	2.41618e-80	2.13988e-78	172.533
BLM	2.65594	4.43043	24.8195	2.81041e-80	2.47835e-78	172.382
HAL	1.71888	8.92939	24.7972	3.45279e-80	3.03181e-78	172.177
GNA15	2.19371	9.43688	24.7781	4.11991e-80	3.60031e-78	172
IL4R	2.35205	9.65378	24.7777	4.13527e-80	3.60031e-78	171.997
LOC100506411	1.64598	4.34315	24.7735	4.29648e-80	3.72489e-78	171.958
CENPE	3.36483	5.04933	24.772	4.3601e-80	3.76416e-78	171.944
GARS	0.800283	12.5992	24.7678	4.52904e-80	3.89365e-78	171.906
ARHGEF10	-1.59702	5.90006	-24.7636	4.7111e-80	4.03329e-78	171.866
AMMECR1	1.11737	7.66668	24.738	5.96633e-80	5.08673e-78	171.631
XAF1	1.58291	8.3839	24.7323	6.29084e-80	5.34124e-78	171.578
PRSS3P2	1.70384	8.9099	24.7304	6.40013e-80	5.41167e-78	171.561
PLCD1	1.79834	8.11635	24.7295	6.45576e-80	5.43633e-78	171.552
SPRR2B	3.6153	13.0659	24.7268	6.61543e-80	5.54805e-78	171.528
EIF4EBP1	1.86368	8.00398	24.7096	7.75504e-80	6.47735e-78	171.369
TOMM40L	1.05949	8.83578	24.7087	7.81977e-80	6.50497e-78	171.361
PRELID1	0.935236	11.151	24.6475	1.37705e-79	1.14089e-77	170.796
IFI27	2.4152	12.5479	24.5649	2.9575e-79	2.44047e-77	170.033
BIRC5	1.74979	6.59024	24.5061	5.09719e-79	4.18928e-77	169.489
SOD2	1.4646	9.1649	24.4918	5.81694e-79	4.76178e-77	169.358
TC2N	0.905414	6.87252	24.4903	5.89964e-79	4.81031e-77	169.343
TTK	2.98523	5.35876	24.4825	6.34307e-79	5.1368e-77	169.271
S100A8	1.61717	13.7045	24.4824	6.35006e-79	5.1368e-77	169.27
TRIP13	2.54602	5.87584	24.4629	7.60358e-79	6.12517e-77	169.09
ATP10B	2.22743	9.14645	24.4625	7.6315e-79	6.12517e-77	169.087
EIF4A3	0.929215	12.3858	24.4583	7.93716e-79	6.34571e-77	169.047
PBK	2.63246	5.87012	24.4005	1.35548e-78	1.0795e-76	168.513
RAI14	-1.24035	10.1178	-24.3914	1.47572e-78	1.17072e-76	168.428
PAPLN	-0.892326	6.14901	-24.374	1.73353e-78	1.36996e-76	168.268
OVOL1	1.85763	7.33376	24.3721	1.76432e-78	1.38894e-76	168.25
SEC62	-0.738325	10.6312	-24.3466	2.23488e-78	1.75267e-76	168.014
MAP3K9	0.855927	5.76398	24.3219	2.81001e-78	2.18702e-76	167.785
CARD14	0.963209	4.28088	24.2994	3.46318e-78	2.68521e-76	167.577
GK	1.92707	6.20039	24.2708	4.51643e-78	3.48869e-76	167.312
SLC16A6	1.87274	7.49167	24.2594	5.02103e-78	3.86394e-76	167.206
TFDP1	1.20902	6.82965	24.2528	5.33777e-78	4.09236e-76	167.145
IFI6	3.49527	8.48235	24.2369	6.19016e-78	4.72822e-76	166.997
BZW1	1.11898	11.8417	24.1829	1.02186e-77	7.77632e-76	166.497
IRF1	1.8227	7.61922	24.1812	1.03764e-77	7.86727e-76	166.481
NDC80	2.91278	7.54256	24.1745	1.10479e-77	8.34563e-76	166.419
ZNF677	-1.04105	4.87317	-24.1664	1.19059e-77	8.96086e-76	166.344
KRT6B	1.66022	13.7022	24.1573	1.29632e-77	9.72101e-76	166.259
C10orf99	5.12177	10.6014	24.1563	1.30878e-77	9.7787e-76	166.25
ESRP2	1.27456	11.7446	24.0844	2.55161e-77	1.89956e-75	165.583
LYPD5	3.34834	6.2069	24.0814	2.62613e-77	1.94798e-75	165.554
SSBP2	-1.01559	6.3724	-24.0785	2.69607e-77	1.99266e-75	165.528
CNFN	3.09039	12.5438	24.0494	3.53451e-77	2.5937e-75	165.258
DCUN1D3	1.37829	9.80543	24.0266	4.36901e-77	3.19466e-75	165.046
NR3C2	-2.61314	7.11771	-23.9995	5.62137e-77	4.08999e-75	164.795
CCNB2	0.797195	3.79172	23.9993	5.63327e-77	4.08999e-75	164.793
MLXIP	-0.594651	5.85992	-23.9747	7.08389e-77	5.12509e-75	164.564
ARG1	2.86842	7.43375	23.9693	7.44827e-77	5.36981e-75	164.514
HS3ST3A1	2.61679	4.49812	23.9688	7.48222e-77	5.37542e-75	164.509
UBE2G1	0.849441	10.4145	23.9618	7.9867e-77	5.71786e-75	164.444
CXCL2	1.28517	3.35254	23.9467	9.19509e-77	6.56012e-75	164.304
PPP4R1	0.91355	11.9618	23.9445	9.38562e-77	6.67288e-75	164.283
TRIM10	0.741197	2.84572	23.9325	1.04916e-76	7.43349e-75	164.172
TNFRSF21	1.61143	9.46688	23.9268	1.10704e-76	7.81662e-75	164.118
GAL3ST4	-0.921149	10.7041	-23.9197	1.18203e-76	8.31751e-75	164.053
EFNB2	-1.67263	8.61605	-23.8601	2.05956e-76	1.44429e-74	163.499
ABCA12	2.71086	11.0127	23.8332	2.64809e-76	1.85069e-74	163.248
RALGPS2	1.23813	7.14025	23.8282	2.77243e-76	1.92546e-74	163.202
SPC25	2.36087	4.39372	23.8282	2.77382e-76	1.92546e-74	163.201
GPD1L	-0.963629	10.5234	-23.817	3.07866e-76	2.12987e-74	163.097
CTPS1	1.60247	9.50913	23.8045	3.46058e-76	2.38606e-74	162.981
CFB	1.00727	6.37654	23.7579	5.34124e-76	3.67045e-74	162.547
ADRB2	-1.63173	8.01627	-23.7571	5.38234e-76	3.68637e-74	162.54
LINC01214	2.60449	5.47988	23.7496	5.77014e-76	3.93884e-74	162.47
CDCA5	2.97611	7.43512	23.7432	6.1255e-76	4.16757e-74	162.411
AMPD3	0.742642	6.15421	23.74	6.31304e-76	4.28099e-74	162.38
TPBG	1.2036	9.65231	23.7381	6.42418e-76	4.34202e-74	162.363
SHFL	1.39036	8.79263	23.6952	9.58627e-76	6.458e-74	161.964
TMEM86A	2.60228	7.71548	23.6947	9.63183e-76	6.46749e-74	161.959
FAM83D	2.62545	7.31424	23.6889	1.01733e-75	6.80879e-74	161.904
CXCL8	4.39088	4.92941	23.6709	1.20364e-75	8.02963e-74	161.736
ESYT3	1.45043	6.51829	23.6507	1.45257e-75	9.65887e-74	161.549
MAPK14	1.45726	7.32661	23.6387	1.6252e-75	1.07719e-73	161.437
TXNDC17	0.901085	10.0342	23.6383	1.63153e-75	1.07791e-73	161.433
AUNIP	1.22837	3.95973	23.5786	2.8486e-75	1.87597e-73	160.876
F12	0.949482	5.26273	23.5639	3.2683e-75	2.14549e-73	160.739
LINC01806	1.9198	4.30309	23.5619	3.33114e-75	2.17977e-73	160.72
DEFB4A	4.52908	12.8602	23.5497	3.73448e-75	2.43594e-73	160.606
PTAFR	1.07329	4.1387	23.5451	3.89786e-75	2.52868e-73	160.563
CDKN3	3.1611	6.03346	23.545	3.90126e-75	2.52868e-73	160.562
STYK1	1.81316	4.25775	23.5398	4.09618e-75	2.64667e-73	160.514
VCP	1.02056	9.73566	23.514	5.21044e-75	3.35608e-73	160.274
RTN4	-0.725312	12.5691	-23.5047	5.68358e-75	3.64939e-73	160.187
CKMT1B	0.97726	12.8127	23.4911	6.45712e-75	4.13316e-73	160.059
SYNCRIP	0.845821	9.30157	23.4763	7.41769e-75	4.73327e-73	159.921
USP6NL	1.4557	4.6032	23.4642	8.30632e-75	5.2839e-73	159.808
TJP1	1.43168	10.5137	23.4166	1.29578e-74	8.21739e-73	159.364
SMPD3	1.23846	5.58967	23.4132	1.33764e-74	8.45678e-73	159.332
HIGD1A	1.02898	11.8993	23.3262	3.02221e-74	1.90483e-72	158.519
CHEK1	1.75242	4.44478	23.3248	3.05986e-74	1.92266e-72	158.506
DTX3L	1.01818	11.2179	23.3065	3.63407e-74	2.2765e-72	158.335
C12orf29	1.56179	10.0738	23.2933	4.10995e-74	2.56678e-72	158.212
LRRC20	1.70898	3.44695	23.2861	4.39849e-74	2.73866e-72	158.144
FGD4	-0.754053	6.88294	-23.281	4.61527e-74	2.86496e-72	158.096
TPX2	2.20574	8.12398	23.2766	4.807e-74	2.97498e-72	158.056
AAMDC	-0.946374	6.63243	-23.2672	5.24803e-74	3.23817e-72	157.968
UBE3C	0.586942	4.81657	23.1691	1.31696e-73	8.10167e-72	157.05
MACROD2	-0.960365	2.99712	-23.164	1.38117e-73	8.47133e-72	157.002
TNFRSF4	0.91674	4.28466	23.1602	1.43117e-73	8.75187e-72	156.967
RIPOR3	1.40579	5.27885	23.1537	1.52142e-73	9.27615e-72	156.906
VSIG10L	1.29199	11.6735	23.1508	1.56323e-73	9.50289e-72	156.878
FOSL1	3.70377	4.42199	23.1408	1.71639e-73	1.04032e-71	156.785
SPTBN1	-0.722203	6.54225	-23.0766	3.13699e-73	1.8902e-71	156.183
PUSL1	1.76628	7.09478	23.074	3.21458e-73	1.93129e-71	156.159
TNFSF10	0.901119	11.5197	23.0677	3.40894e-73	2.04208e-71	156.1
AURKA	1.96281	6.73587	23.0658	3.46895e-73	2.07199e-71	156.083
GGH	1.77493	11.5316	23.0521	3.94559e-73	2.34986e-71	155.954
FAM13A	-0.93039	5.65458	-23.046	4.17765e-73	2.48087e-71	155.897
SQOR	1.01379	11.4159	23.0165	5.51242e-73	3.26409e-71	155.62
JMY	1.8225	9.94137	23.0127	5.71569e-73	3.37472e-71	155.584
CWH43	0.946042	11.859	22.9897	7.0906e-73	4.17451e-71	155.369
PUDP	2.38804	6.99449	22.9605	9.33069e-73	5.47765e-71	155.095
STUM	-1.25463	3.5863	-22.9573	9.61462e-73	5.62825e-71	155.065
SQLE	1.48713	6.45522	22.9484	1.04539e-72	6.10216e-71	154.982
TMEM79	0.989677	12.0393	22.9403	1.12743e-72	6.5624e-71	154.906
EIF5	0.651278	9.82327	22.9308	1.2335e-72	7.15954e-71	154.816
AKIRIN2	1.05031	6.63489	22.9271	1.27616e-72	7.38626e-71	154.783
IFIT1	2.80465	9.70846	22.8857	1.88307e-72	1.08684e-70	154.394
ZBED2	3.76998	6.48142	22.8836	1.9207e-72	1.10545e-70	154.374
AIM2	3.5664	4.80862	22.8359	3.00905e-72	1.7222e-70	153.926
UBE2N	0.838114	10.4165	22.803	4.10058e-72	2.34041e-70	153.617
IRF9	1.188	10.4499	22.7938	4.46994e-72	2.54415e-70	153.531
SHC1	1.29936	9.90928	22.781	5.04023e-72	2.85294e-70	153.411
PGAM1	0.694265	13.2497	22.7733	5.41886e-72	3.05883e-70	153.339
PSME3	1.45311	9.37458	22.754	6.49818e-72	3.65803e-70	153.158
CEMIP	1.05187	3.66112	22.7462	6.99735e-72	3.92827e-70	153.084
RAB38	1.29276	11.7263	22.7388	7.49672e-72	4.19714e-70	153.015
CDCA2	1.33848	3.71463	22.7295	8.18925e-72	4.57241e-70	152.927
SLC35E4	1.064	3.13542	22.7291	8.21694e-72	4.57543e-70	152.924
SPTSSA	0.994968	11.511	22.7141	9.45855e-72	5.25256e-70	152.783
PSME2	0.771306	12.7124	22.6934	1.14999e-71	6.36895e-70	152.588
WNT2B	-1.20802	4.83824	-22.6895	1.19251e-71	6.58672e-70	152.552
METAP1	0.690083	11.0626	22.6694	1.4408e-71	7.93677e-70	152.363
TK1	1.65238	4.74758	22.662	1.54541e-71	8.49025e-70	152.293
HAS3	1.96461	8.90021	22.6589	1.59126e-71	8.71881e-70	152.264
TSHZ2	-0.990987	5.08321	-22.6351	1.98983e-71	1.08737e-69	152.041
LCE3D	3.19551	13.0157	22.6222	2.24819e-71	1.22529e-69	151.919
F3	-1.32357	11.3293	-22.6161	2.38157e-71	1.29455e-69	151.861
TNFAIP1	1.01466	8.43985	22.6045	2.6551e-71	1.43943e-69	151.753
SLC2A1	2.05802	7.88806	22.5989	2.79874e-71	1.51331e-69	151.7
FST	-1.50167	5.72906	-22.5841	3.21758e-71	1.73521e-69	151.561
KIF2A	1.63522	7.1446	22.5342	5.15245e-71	2.7714e-69	151.091
PLSCR1	0.867453	7.53572	22.5229	5.7309e-71	3.07448e-69	150.985
LSP1	-1.59723	9.49463	-22.5209	5.83747e-71	3.1235e-69	150.966
ZNF662	0.679223	11.846	22.5081	6.59046e-71	3.51725e-69	150.845
AVEN	1.84972	7.61937	22.4983	7.22728e-71	3.84712e-69	150.753
MALT1	1.10115	7.59983	22.4914	7.7111e-71	4.0835e-69	150.689
QSOX1	0.864964	7.57711	22.4842	8.2493e-71	4.35729e-69	150.621
PRSS3	2.26919	11.353	22.4697	9.46516e-71	4.97393e-69	150.484
HSPA4L	1.30866	8.68575	22.4691	9.51702e-71	4.98842e-69	150.479
LONRF1	-1.08049	7.84959	-22.4106	1.65137e-70	8.61187e-69	149.928
PHF3	-0.733774	8.16956	-22.4098	1.66395e-70	8.65548e-69	149.921
KLK6	5.66243	9.1392	22.4048	1.74492e-70	9.05374e-69	149.873
DUOXA2	2.00187	6.24325	22.3893	2.01998e-70	1.04283e-68	149.727
C11orf52	-2.3082	6.6006	-22.3848	2.10719e-70	1.08512e-68	149.685
ZNF165	2.957	6.31065	22.3745	2.32282e-70	1.19318e-68	149.588
WARS	1.54433	8.59942	22.3715	2.38936e-70	1.22429e-68	149.56
ITM2A	-1.76499	9.781	-22.3682	2.46389e-70	1.25934e-68	149.529
EPHA2	1.6066	9.69952	22.3645	2.55342e-70	1.30186e-68	149.493
SESN2	0.992907	4.75183	22.3608	2.64365e-70	1.34453e-68	149.459
S100A7	1.29386	14.8089	22.359	2.68867e-70	1.36405e-68	149.442
LAMP3	1.89904	11.1057	22.3349	3.37557e-70	1.70832e-68	149.215
MYO1B	1.11676	7.21394	22.3197	3.89659e-70	1.96715e-68	149.071
CYP24A1	2.80987	4.91765	22.3142	4.10297e-70	2.06627e-68	149.02
GLB1L3	0.748229	6.08478	22.3111	4.22649e-70	2.12327e-68	148.99
TRIM22	1.28035	11.3658	22.2989	4.74013e-70	2.3755e-68	148.876
RSC1A1	0.79632	3.49846	22.2967	4.83999e-70	2.41964e-68	148.855
DDX60	1.61528	11.033	22.2908	5.1172e-70	2.55202e-68	148.799
LRG1	3.93869	6.42076	22.2759	5.88855e-70	2.92959e-68	148.659
LOC101928100	2.3263	7.60658	22.2316	8.94826e-70	4.44106e-68	148.242
MCUB	0.907253	9.89966	22.2201	9.97737e-70	4.93988e-68	148.133
GOT2	0.711735	11.8743	22.1736	1.54834e-69	7.62917e-68	147.694
DUSP14	1.14778	11.2102	22.1722	1.56826e-69	7.70886e-68	147.682
NFIB	-1.05343	8.4033	-22.1612	1.74127e-69	8.53887e-68	147.577
TRIM62	0.886398	5.39381	22.1456	2.0165e-69	9.85284e-68	147.431
MYO9A	-0.97295	8.07325	-22.1455	2.01881e-69	9.85284e-68	147.429
GMPPB	1.01084	4.82819	22.1452	2.02525e-69	9.86086e-68	147.426
STX6	0.662971	6.25094	22.1447	2.03368e-69	9.87848e-68	147.422
ALOX12B	2.34942	12.0833	22.1118	2.77638e-69	1.34543e-67	147.111
CHPT1	-1.63652	7.26845	-22.1099	2.8273e-69	1.36688e-67	147.093
C14orf132	-2.10522	7.76696	-22.0952	3.24824e-69	1.56303e-67	146.955
ACP5	1.852	6.69565	22.0844	3.59802e-69	1.7273e-67	146.853
EEF2K	-0.996653	11.8034	-22.0764	3.88008e-69	1.85837e-67	146.777
PLAT	3.27447	8.47905	22.0756	3.91094e-69	1.86879e-67	146.769
IRS1	-0.875473	7.08347	-22.0534	4.8243e-69	2.29456e-67	146.56
SERTAD1	1.79207	8.43882	22.0366	5.65236e-69	2.6822e-67	146.402
MAGI1	-0.751686	5.17978	-22.0337	5.81072e-69	2.75099e-67	146.374
IFI44	2.23853	10.0096	22.0012	7.901e-69	3.73199e-67	146.068
GJA3	1.47907	3.35443	21.9903	8.7599e-69	4.1282e-67	145.965
NIPAL4	1.57998	9.9468	21.9583	1.1858e-68	5.57544e-67	145.662
OLFML2A	-1.14314	10.2573	-21.9434	1.36579e-68	6.40707e-67	145.521
DDX60L	1.05407	6.47146	21.8886	2.29466e-68	1.07399e-66	145.003
GATAD2B	-0.614508	9.71248	-21.885	2.373e-68	1.10814e-66	144.97
PUS10	0.704376	4.30313	21.8619	2.95415e-68	1.37639e-66	144.751
MIR155HG	1.46204	3.33369	21.8456	3.44794e-68	1.5992e-66	144.597
FRMD4A	-0.843168	6.30941	-21.8452	3.46067e-68	1.60149e-66	144.593
CEBPD	1.68516	8.6851	21.8373	3.72801e-68	1.72134e-66	144.519
TMEM47	-1.92052	8.04146	-21.8304	3.97934e-68	1.83326e-66	144.454
CLCA2	0.957881	12.0816	21.8193	4.42154e-68	2.03242e-66	144.349
RASGRP1	1.59227	10.9529	21.803	5.15872e-68	2.36072e-66	144.195
MPZL3	0.825827	7.1608	21.8021	5.20572e-68	2.37693e-66	144.186
GPT2	1.6493	10.3918	21.8008	5.27001e-68	2.40095e-66	144.173
DNAJC5	0.834674	7.6723	21.7756	6.68983e-68	3.04106e-66	143.935
CHAC2	2.36664	4.75873	21.7549	8.13732e-68	3.69089e-66	143.74
TRIM69	0.920809	5.06576	21.7485	8.64822e-68	3.91399e-66	143.679
TPRXL	2.1253	4.70493	21.7447	8.96126e-68	4.04675e-66	143.643
VSNL1	1.98772	9.86495	21.7078	1.27205e-67	5.73174e-66	143.294
TAP2	0.991231	5.77534	21.7045	1.31219e-67	5.89968e-66	143.263
LIFR	-1.27524	6.17688	-21.6984	1.38965e-67	6.2343e-66	143.206
PHLDA2	1.4359	6.22006	21.6903	1.50073e-67	6.71799e-66	143.129
APOL2	1.06156	9.65602	21.6475	2.25252e-67	1.00614e-65	142.723
POR	1.9024	6.69112	21.6451	2.30343e-67	1.02665e-65	142.701
SNRPN	-1.00609	5.84956	-21.6399	2.42064e-67	1.07656e-65	142.652
CYSRT1	2.16307	10.7052	21.6218	2.87438e-67	1.27559e-65	142.48
LINC01137	1.58474	3.50582	21.5926	3.79056e-67	1.67855e-65	142.204
SMURF2	-1.09566	8.81257	-21.5866	4.01125e-67	1.77245e-65	142.147
SHROOM2	2.29596	7.24585	21.5789	4.31772e-67	1.90378e-65	142.074
FAM117A	-1.39152	8.95463	-21.5583	5.25086e-67	2.31027e-65	141.879
CCDC85C	1.044	9.48839	21.5349	6.55199e-67	2.87658e-65	141.658
PPARGC1A	-0.989872	5.83148	-21.5078	8.47252e-67	3.71183e-65	141.401
ERO1A	1.3278	10.2279	21.5071	8.53316e-67	3.72252e-65	141.394
ZBTB4	-0.593288	11.0011	-21.4868	1.03445e-66	4.50316e-65	141.202
SPRR3	2.79983	8.30911	21.4849	1.05361e-66	4.57688e-65	141.184
LRP4	-1.12783	11.7279	-21.4709	1.20283e-66	5.21405e-65	141.051
CTLA4	0.831225	2.85899	21.4692	1.22212e-66	5.28649e-65	141.036
DDX21	0.787796	11.8104	21.4515	1.44599e-66	6.24177e-65	140.868
ZNF573	-0.726445	5.5836	-21.4499	1.46804e-66	6.32364e-65	140.853
CEP68	-0.86089	7.54766	-21.4074	2.19745e-66	9.44582e-65	140.45
MREG	0.848913	7.99151	21.3816	2.80941e-66	1.20511e-64	140.205
MFHAS1	1.47797	9.35919	21.3793	2.87042e-66	1.22872e-64	140.183
POLE2	1.94487	7.41654	21.3451	3.97348e-66	1.69384e-64	139.859
CRY2	-1.81817	8.40008	-21.3353	4.36014e-66	1.85482e-64	139.766
TMEM116	-0.734446	4.61152	-21.3303	4.57073e-66	1.94039e-64	139.719
TUBG1	1.83751	8.75234	21.3222	4.93578e-66	2.09104e-64	139.642
DMD	-0.690379	4.97876	-21.3173	5.17035e-66	2.18591e-64	139.596
CMAHP	-1.11053	4.45478	-21.3169	5.19421e-66	2.19149e-64	139.591
MED8	0.943653	10.0187	21.3	6.09818e-66	2.56761e-64	139.431
TMEM171	1.18455	2.86578	21.2773	7.56194e-66	3.17741e-64	139.216
ZWILCH	0.831292	6.56263	21.2658	8.43843e-66	3.53846e-64	139.107
DIP2C	-0.720072	6.64787	-21.2644	8.55337e-66	3.57935e-64	139.093
LGALS3BP	1.62612	10.4093	21.2601	8.9027e-66	3.71796e-64	139.053
FKBPL	1.42632	6.34473	21.2404	1.07424e-65	4.47716e-64	138.866
FAM160A1	0.777071	6.27013	21.2265	1.22573e-65	5.09818e-64	138.734
H2AFX	0.73079	5.33453	21.2068	1.47876e-65	6.12583e-64	138.547
CRTAP	-0.931466	9.25089	-21.192	1.70061e-65	7.03069e-64	138.407
KLHL18	0.832923	5.52573	21.1914	1.7105e-65	7.05736e-64	138.402
MAML2	-0.988134	6.02111	-21.1895	1.74213e-65	7.17345e-64	138.383
NRN1	-1.53958	10.2007	-21.1741	2.01667e-65	8.2873e-64	138.237
ANKH	-0.621654	5.92575	-21.1701	2.09502e-65	8.59209e-64	138.199
SAMSN1	1.6241	4.25132	21.1647	2.20623e-65	9.01222e-64	138.148
KLRB1	1.44127	4.12644	21.1624	2.25381e-65	9.18832e-64	138.126
TPPP	-2.00594	5.84282	-21.1574	2.3649e-65	9.62208e-64	138.078
KMT2E	-0.748431	11.467	-21.151	2.51277e-65	1.02035e-63	138.018
ARFGEF3	-1.21002	5.08717	-21.1505	2.5244e-65	1.02306e-63	138.013
RCC1	1.27294	6.30805	21.1497	2.54344e-65	1.02874e-63	138.006
DIAPH3	0.756551	4.22055	21.1478	2.59054e-65	1.04573e-63	137.987
RBBP6	0.686466	8.07791	21.1446	2.66999e-65	1.07569e-63	137.957
GLT1D1	1.74678	3.43469	21.1401	2.78752e-65	1.12085e-63	137.914
PDZK1IP1	2.20782	11.5443	21.1396	2.79983e-65	1.1236e-63	137.91
ARG2	1.37083	8.35661	21.1114	3.65981e-65	1.46585e-63	137.643
SLC30A9	1.16569	9.12024	21.1098	3.7178e-65	1.48618e-63	137.627
IL7R	1.5299	5.87089	21.1016	4.01858e-65	1.6033e-63	137.549
GLUL	1.8161	8.7289	21.0928	4.3691e-65	1.7364e-63	137.466
KIF14	1.42255	5.22971	21.0899	4.49384e-65	1.78253e-63	137.438
NCAPG	1.84855	8.78556	21.0761	5.12115e-65	2.02744e-63	137.307
SORBS1	-0.660778	5.91921	-21.0736	5.24519e-65	2.07256e-63	137.283
RIT1	0.886097	8.91166	21.0672	5.57555e-65	2.19887e-63	137.222
KIAA0513	0.930302	6.20395	21.064	5.74395e-65	2.26094e-63	137.193
PIK3R1	-1.23857	9.03457	-21.0169	8.99479e-65	3.53377e-63	136.745
CLCN3	1.37367	9.4737	21.0137	9.27538e-65	3.63705e-63	136.714
KIF18B	1.83658	9.18232	21.0054	1.00362e-64	3.9279e-63	136.636
ARF3	1.27418	8.90258	21.0005	1.05183e-64	4.10876e-63	136.589
CKS2	1.61819	10.5318	20.9979	1.07762e-64	4.20148e-63	136.565
CENPW	1.5121	8.92273	20.9847	1.22201e-64	4.75541e-63	136.439
KATNB1	1.08602	7.28252	20.9824	1.24873e-64	4.84107e-63	136.418
BBS2	-1.01295	11.2921	-20.971	1.392e-64	5.38634e-63	136.309
ACPP	2.52348	9.35147	20.9693	1.4146e-64	5.4599e-63	136.293
NFE2L3	1.98765	8.98383	20.9692	1.41633e-64	5.4599e-63	136.292
MAPK13	1.33538	10.9096	20.9676	1.43854e-64	5.53513e-63	136.276
KLHDC7B	2.37151	3.55888	20.9664	1.45422e-64	5.58503e-63	136.265
MFSD4A	-1.2601	4.94456	-20.9613	1.52696e-64	5.85342e-63	136.217
RNASE4	-1.68382	9.39068	-20.9492	1.71333e-64	6.55564e-63	136.102
TOMM40	1.14322	8.7654	20.9455	1.77422e-64	6.77599e-63	136.067
IRAK1	0.686577	7.446	20.9357	1.94803e-64	7.42599e-63	135.974
TMEM40	1.56374	8.35557	20.9353	1.95518e-64	7.43947e-63	135.97
ATP13A4	1.22269	5.4508	20.9321	2.01639e-64	7.65819e-63	135.939
FZD5	1.12603	4.91539	20.9109	2.46704e-64	9.35244e-63	135.738
PCLAF	0.98752	5.22901	20.9059	2.58604e-64	9.78553e-63	135.691
C2orf68	-0.937193	8.05587	-20.8731	3.53321e-64	1.3345e-62	135.379
ABHD17C	1.6979	9.04569	20.8699	3.64309e-64	1.37348e-62	135.349
PRKCH	0.863612	6.60382	20.8674	3.73112e-64	1.40409e-62	135.325
GINS2	0.616247	4.38723	20.8669	3.7504e-64	1.40876e-62	135.32
S100A16	0.670571	13.5851	20.8643	3.84468e-64	1.44154e-62	135.295
CDCA3	1.64342	4.74052	20.8622	3.92018e-64	1.46718e-62	135.276
CEACAM19	1.45081	7.79528	20.8617	3.94094e-64	1.47226e-62	135.27
ASF1B	2.02885	4.70909	20.8434	4.68962e-64	1.74561e-62	135.097
SPCS3	1.15746	8.76298	20.8366	5.00344e-64	1.85906e-62	135.032
SSPN	-1.05059	5.90487	-20.8351	5.0762e-64	1.88268e-62	135.018
EPB41L4B	-0.692796	5.01747	-20.8348	5.09245e-64	1.88531e-62	135.015
NDUFAF2	0.843716	9.9236	20.8318	5.23856e-64	1.93591e-62	134.986
PRELID3B	0.98442	10.9689	20.8259	5.53922e-64	2.04335e-62	134.931
CAMK2N1	-1.09897	5.75725	-20.7969	7.30328e-64	2.68926e-62	134.655
RAB31	1.62613	9.87096	20.7667	9.74e-64	3.5801e-62	134.367
COMTD1	1.19393	9.08248	20.7647	9.92341e-64	3.641e-62	134.349
ANGPTL4	1.8453	4.55124	20.7629	1.0096e-63	3.69772e-62	134.332
DEDD2	1.03154	10.3481	20.7504	1.13694e-63	4.15672e-62	134.213
PSMD12	0.697504	10.4534	20.7499	1.14283e-63	4.17084e-62	134.208
ZC3HAV1	0.898723	8.99521	20.7282	1.40514e-63	5.10997e-62	134.002
ADAM23	1.43156	4.01233	20.7255	1.44099e-63	5.23111e-62	133.976
IKBKE	1.21357	4.32398	20.7209	1.50641e-63	5.45893e-62	133.932
PYGL	0.852411	11.5751	20.712	1.63956e-63	5.93072e-62	133.848
SNCA	-1.0142	7.37221	-20.707	1.71888e-63	6.1961e-62	133.8
TIMP3	-1.82511	9.76816	-20.6946	1.93515e-63	6.95132e-62	133.682
SLC7A5	1.84269	11.0044	20.6944	1.93925e-63	6.95388e-62	133.68
CNNM4	1.74942	6.73403	20.6846	2.12854e-63	7.61935e-62	133.587
BACH2	-1.09289	3.41326	-20.6823	2.17578e-63	7.77492e-62	133.565
GPC4	-1.11375	4.66821	-20.6803	2.21758e-63	7.91053e-62	133.546
GPX2	1.29747	5.32242	20.6615	2.6517e-63	9.4427e-62	133.368
CXCL10	4.54309	7.44554	20.6609	2.66915e-63	9.48843e-62	133.361
RPP40	1.35733	7.81445	20.6482	3.01242e-63	1.06718e-61	133.24
PLCXD2	1.05594	3.81418	20.6367	3.36012e-63	1.1883e-61	133.131
PCDHB16	-1.67545	4.87572	-20.6312	3.54077e-63	1.24789e-61	133.079
MPHOSPH8	-0.616846	8.55859	-20.6187	3.99048e-63	1.40398e-61	132.96
BAG3	0.724244	10.8925	20.615	4.13204e-63	1.4513e-61	132.925
MTFR2	1.01953	4.44109	20.602	4.67786e-63	1.6402e-61	132.801
SEMA7A	0.71358	3.59895	20.578	5.87714e-63	2.0572e-61	132.573
HEATR3	1.28176	6.83375	20.5722	6.21576e-63	2.17203e-61	132.518
GATA3	-1.02045	11.4586	-20.5651	6.65121e-63	2.31631e-61	132.45
PPP6R1	1.13388	5.98051	20.5608	6.92712e-63	2.40832e-61	132.409
CEP55	1.86303	8.37294	20.5364	8.74347e-63	3.02955e-61	132.177
CST7	2.73613	7.04498	20.5252	9.72723e-63	3.36474e-61	132.071
ZBTB8OS	0.697077	10.1317	20.5243	9.80973e-63	3.38757e-61	132.062
AEN	1.72071	6.95039	20.5241	9.82814e-63	3.38823e-61	132.06
ZCCHC10	1.07628	8.87955	20.5137	1.08514e-62	3.72849e-61	131.961
BICDL2	1.33749	8.86153	20.4918	1.3379e-62	4.5893e-61	131.752
TMEM51	1.10639	6.68008	20.4849	1.4279e-62	4.88984e-61	131.687
NUF2	1.84469	5.81529	20.4819	1.47019e-62	5.02629e-61	131.658
SYNE1	-1.0046	4.95108	-20.4736	1.59132e-62	5.43138e-61	131.579
PDCD4	-0.78264	9.6043	-20.4639	1.74534e-62	5.94719e-61	131.487
TCF7L2	-1.00042	8.64661	-20.4594	1.82154e-62	6.19655e-61	131.444
SLCO3A1	-0.883451	6.10319	-20.4406	2.17995e-62	7.40353e-61	131.265
CDCA8	2.06134	5.02261	20.426	2.50509e-62	8.49373e-61	131.126
SBNO2	1.03479	5.96004	20.4225	2.58908e-62	8.76404e-61	131.094
BUB1B	2.28839	7.56028	20.4074	2.98973e-62	1.01036e-60	130.95
AHCY	0.999602	10.0389	20.4062	3.02566e-62	1.02083e-60	130.938
TOMM5	0.662766	12.4605	20.3936	3.4131e-62	1.14965e-60	130.818
FNBP1L	-1.00016	10.5968	-20.3836	3.75462e-62	1.26262e-60	130.723
RABL2B	-0.817872	10.5307	-20.3821	3.80605e-62	1.27783e-60	130.709
CMTM4	-0.798518	6.02157	-20.368	4.35655e-62	1.45788e-60	130.574
ACOT7	0.780829	6.07126	20.3592	4.73608e-62	1.58231e-60	130.491
TGM3	2.91154	10.5705	20.359	4.74462e-62	1.58259e-60	130.489
THAP2	0.827929	3.9868	20.3574	4.81805e-62	1.60448e-60	130.474
CLPX	0.586714	10.9876	20.3468	5.33264e-62	1.77297e-60	130.372
KIT	-1.00717	10.8489	-20.3047	7.97056e-62	2.64574e-60	129.971
NUP50	0.691589	6.38927	20.3002	8.32076e-62	2.75753e-60	129.928
AREG	1.03828	3.88299	20.2938	8.8434e-62	2.92601e-60	129.868
SRXN1	1.7636	8.10409	20.2902	9.14725e-62	3.02168e-60	129.834
ACTR3C	1.00773	2.94303	20.2876	9.37675e-62	3.09252e-60	129.809
APEX2	1.10319	6.41789	20.279	1.01804e-61	3.3522e-60	129.727
STARD4	2.76397	6.62094	20.2764	1.04377e-61	3.43141e-60	129.702
EID1	-0.598503	11.6385	-20.2621	1.19692e-61	3.9286e-60	129.566
EIF2B2	1.00362	10.4196	20.2499	1.34365e-61	4.39965e-60	129.45
SCIN	-1.04784	4.06356	-20.2499	1.34471e-61	4.39965e-60	129.449
ARL8B	0.829057	11.9462	20.2427	1.43955e-61	4.70246e-60	129.381
MOXD1	0.943972	6.86807	20.2362	1.53123e-61	4.99399e-60	129.32
ZBTB16	-3.85409	6.06443	-20.2239	1.72217e-61	5.60783e-60	129.202
DDX52	0.812094	6.60083	20.2037	2.08944e-61	6.78226e-60	129.009
TDP2	0.791946	11.5327	20.1848	2.50303e-61	8.11196e-60	128.829
TMEM54	1.4923	10.5756	20.1774	2.68466e-61	8.67321e-60	128.759
CTSC	1.16356	9.88007	20.1631	3.07771e-61	9.91187e-60	128.623
PMP22	-0.9412	7.92078	-20.1341	4.05848e-61	1.30296e-59	128.347
PRSS22	1.59506	5.74375	20.129	4.26323e-61	1.36656e-59	128.298
GABBR1	-0.784721	7.41649	-20.1224	4.53871e-61	1.4526e-59	128.235
PARPBP	0.791643	3.22355	20.1219	4.56218e-61	1.45784e-59	128.23
PAMR1	-3.02162	8.31554	-20.1084	5.18898e-61	1.65556e-59	128.102
SLC27A4	2.16666	7.49376	20.0965	5.8105e-61	1.85098e-59	127.989
PSMD1	0.882789	11.1249	20.0894	6.2214e-61	1.97881e-59	127.921
GBP5	1.59353	5.32974	20.0826	6.6348e-61	2.10704e-59	127.856
ZNF274	-0.896679	8.03264	-20.082	6.67893e-61	2.11778e-59	127.85
FOXC1	-1.58027	8.03506	-20.0691	7.55161e-61	2.38712e-59	127.727
FGFBP1	1.64906	12.0314	20.0592	8.29905e-61	2.61937e-59	127.633
PRSS53	2.07455	5.69771	20.0402	9.9507e-61	3.13585e-59	127.452
CD47	0.766388	8.78772	20.0395	1.00157e-60	3.15149e-59	127.445
PYCARD	1.44217	10.9414	20.033	1.06626e-60	3.3499e-59	127.383
SLITRK6	-1.66349	5.6321	-20.0115	1.30937e-60	4.10116e-59	127.178
C14orf119	0.71044	11.7145	20.0077	1.35721e-60	4.24454e-59	127.142
ANXA11	-0.994288	8.67672	-20.0007	1.45163e-60	4.53294e-59	127.075
AASS	1.52818	8.79253	19.9811	1.74995e-60	5.4479e-59	126.888
EDIL3	-0.593843	5.05681	-19.9715	1.91777e-60	5.96132e-59	126.797
STEAP4	1.81751	10.1702	19.9584	2.17273e-60	6.74366e-59	126.672
CDC25B	1.01889	10.6941	19.952	2.30994e-60	7.15873e-59	126.611
IRS2	-0.853398	11.2754	-19.9446	2.48029e-60	7.67507e-59	126.54
IL13RA1	1.35399	8.66496	19.943	2.51703e-60	7.77706e-59	126.526
LDLR	0.882862	3.86037	19.9396	2.60072e-60	8.02357e-59	126.493
SPRY2	-1.11807	9.13392	-19.934	2.74256e-60	8.44848e-59	126.44
WDR72	-0.999101	2.94468	-19.9306	2.83305e-60	8.71418e-59	126.408
SRM	1.38945	9.32434	19.9165	3.2443e-60	9.96422e-59	126.272
FUT1	1.48665	9.4512	19.9104	3.43791e-60	1.05431e-58	126.215
HUS1	0.65071	6.59452	19.8539	5.89651e-60	1.80291e-58	125.676
ZBED6CL	1.80138	4.6229	19.8298	7.42378e-60	2.26643e-58	125.446
CCL27	-2.95672	10.7657	-19.8297	7.43454e-60	2.26643e-58	125.445
MRPL15	0.894646	10.9755	19.8265	7.6646e-60	2.33311e-58	125.414
MAPKAPK3	1.64594	9.75204	19.8184	8.27588e-60	2.51545e-58	125.338
RALA	0.686973	11.3565	19.8114	8.84887e-60	2.68564e-58	125.271
ZNF302	-0.910858	8.77716	-19.7994	9.92864e-60	3.00447e-58	125.156
RAB24	0.997145	10.5969	19.7974	1.01161e-59	3.05668e-58	125.137
SPRR1B	1.83182	13.9135	19.7899	1.08663e-59	3.27855e-58	125.066
CNOT9	0.675326	4.68148	19.7887	1.09997e-59	3.31395e-58	125.054
ATG13	0.961389	7.37812	19.7884	1.10257e-59	3.31692e-58	125.052
CXCL13	3.73339	4.29951	19.786	1.12829e-59	3.38932e-58	125.029
GPM6B	-0.982759	9.74981	-19.7789	1.20806e-59	3.62364e-58	124.96
CRYAB	-1.41648	12.1373	-19.7764	1.23717e-59	3.70557e-58	124.937
PHYH	-1.0446	9.64701	-19.7733	1.27338e-59	3.80846e-58	124.908
UBALD2	0.758559	6.43374	19.7709	1.30377e-59	3.89367e-58	124.884
HMMR	2.28594	6.51742	19.7563	1.49817e-59	4.46777e-58	124.746
GCH1	0.998292	11.1645	19.7486	1.6133e-59	4.80411e-58	124.672
DDX39A	1.20489	10.5957	19.7481	1.62026e-59	4.81788e-58	124.667
CYP4Z2P	4.34271	4.55652	19.7276	1.9722e-59	5.8559e-58	124.471
RCAN2	-1.44604	10.3162	-19.7267	1.98865e-59	5.8962e-58	124.463
TGFBR3	-1.50275	9.83863	-19.7254	2.01322e-59	5.96048e-58	124.451
SNTB1	-0.592714	4.02459	-19.7003	2.55961e-59	7.56723e-58	124.211
XRCC4	1.01852	4.82824	19.6922	2.7664e-59	8.16684e-58	124.134
RPS6KA4	0.610721	4.72722	19.6819	3.05216e-59	8.99752e-58	124.035
ZNF766	-1.02314	8.78017	-19.6725	3.3366e-59	9.82192e-58	123.946
PHYHD1	-1.43292	5.47177	-19.6662	3.54579e-59	1.04079e-57	123.886
IFI16	0.750871	12.5616	19.6391	4.59419e-59	1.3466e-57	123.627
COA6	0.779145	10.1327	19.6211	5.45748e-59	1.59509e-57	123.455
FOXM1	2.16484	7.31279	19.6197	5.52738e-59	1.61323e-57	123.443
SERPINB9	1.04423	6.77303	19.6155	5.75543e-59	1.6774e-57	123.402
PRMT5	0.623499	10.2018	19.589	7.41232e-59	2.15724e-57	123.15
CDC45	1.42967	5.50004	19.5857	7.65393e-59	2.22126e-57	123.118
KIF11	1.34663	10.2997	19.576	8.39214e-59	2.43206e-57	123.026
ZNF557	0.982452	3.71533	19.5708	8.82133e-59	2.55284e-57	122.976
BHLHE41	-0.808057	4.07597	-19.5663	9.21117e-59	2.66191e-57	122.933
ZNF493	-1.17293	6.24149	-19.5605	9.7333e-59	2.80885e-57	122.878
SLC35B1	0.646486	10.9401	19.5576	1.00064e-58	2.88361e-57	122.85
PFN2	-0.830478	11.29	-19.543	1.15067e-58	3.31132e-57	122.711
STAM	1.03061	9.45519	19.5326	1.27167e-58	3.6544e-57	122.611
ZDHHC21	0.906813	5.27806	19.5277	1.33214e-58	3.82284e-57	122.565
DIO2	1.47524	6.26361	19.5262	1.35167e-58	3.87348e-57	122.55
EHF	1.82665	9.31944	19.5164	1.48372e-58	4.24595e-57	122.457
CYP2C18	2.79457	6.3474	19.5157	1.49394e-58	4.26927e-57	122.451
ST6GALNAC1	2.63382	3.92734	19.4789	2.12492e-58	6.04719e-57	122.099
PDGFC	-0.825735	6.86136	-19.4701	2.31136e-58	6.56868e-57	122.015
ALCAM	-0.764515	8.0042	-19.4693	2.32831e-58	6.60771e-57	122.008
NUP50-DT	1.66752	5.29926	19.4423	3.01457e-58	8.5435e-57	121.75
ST14	0.742008	6.4398	19.4409	3.05553e-58	8.64765e-57	121.736
CEP126	-1.21926	5.12656	-19.4296	3.40454e-58	9.62216e-57	121.629
CYP27A1	-1.00511	8.10695	-19.424	3.59015e-58	1.01328e-56	121.576
SDR9C7	3.31964	5.81631	19.4222	3.65119e-58	1.02909e-56	121.559
PANX1	1.05052	6.78378	19.4134	3.97423e-58	1.11861e-56	121.474
PMM2	1.24357	8.97363	19.4108	4.07439e-58	1.14523e-56	121.449
NEK2	0.95506	3.74091	19.401	4.47556e-58	1.25456e-56	121.356
ALAS1	1.36977	9.70585	19.3994	4.54413e-58	1.27205e-56	121.34
TNIP3	4.00508	4.46777	19.3924	4.85903e-58	1.35835e-56	121.274
GABARAPL1	-0.919294	9.2445	-19.3892	5.00853e-58	1.39824e-56	121.243
MRPS17	1.3944	8.63379	19.3849	5.21728e-58	1.45257e-56	121.203
PGM5	-0.626037	4.28262	-19.3821	5.35836e-58	1.48983e-56	121.176
TXNIP	-1.09497	12.9126	-19.3816	5.38277e-58	1.49459e-56	121.171
NTRK2	-0.80865	4.3388	-19.3726	5.86987e-58	1.62326e-56	121.085
SUSD4	2.20546	6.14355	19.3628	6.44845e-58	1.78087e-56	120.991
PRC1	1.78672	8.6544	19.3621	6.49148e-58	1.79034e-56	120.985
TRIM21	1.04526	9.09534	19.3556	6.90708e-58	1.90241e-56	120.923
RALGAPB	0.73091	9.41395	19.3509	7.22053e-58	1.98608e-56	120.878
MFN1	1.01631	8.35444	19.3495	7.32048e-58	2.0082e-56	120.865
NAPG	1.14664	8.59154	19.3427	7.80937e-58	2.13661e-56	120.8
UNC93A	1.71968	7.47565	19.3398	8.02837e-58	2.1936e-56	120.772
LAMC2	-0.960378	5.45567	-19.3191	9.78562e-58	2.67019e-56	120.575
NABP1	1.17958	7.34473	19.3165	1.00332e-57	2.73412e-56	120.55
NOCT	0.876908	5.60629	19.3145	1.02321e-57	2.78462e-56	120.53
DDX58	1.37124	9.46519	19.3003	1.17213e-57	3.18148e-56	120.395
TOP2A	1.01123	7.43053	19.2898	1.29605e-57	3.50855e-56	120.295
GYS1	1.91205	7.39062	19.2764	1.47264e-57	3.98137e-56	120.167
PI4K2A	1.15925	5.66337	19.2755	1.4847e-57	4.00868e-56	120.159
CCDC18-AS1	-0.705311	6.8677	-19.2635	1.66516e-57	4.47827e-56	120.045
PDE4DIP	-0.696757	3.98991	-19.2609	1.7086e-57	4.5891e-56	120.019
TUBA1A	-0.759753	12.8447	-19.2564	1.78213e-57	4.77412e-56	119.977
ITPKC	1.31439	8.86561	19.2452	1.98506e-57	5.30391e-56	119.869
MCFD2	0.647156	6.93262	19.2448	1.99296e-57	5.31809e-56	119.865
GMFB	1.15447	8.83952	19.2433	2.02129e-57	5.38669e-56	119.851
EMC8	0.842326	8.73879	19.2385	2.11494e-57	5.62897e-56	119.806
SEC24A	1.02699	7.24922	19.2347	2.19512e-57	5.8348e-56	119.769
CORO2B	-1.57643	6.93294	-19.2335	2.21956e-57	5.89216e-56	119.758
DSG2	-0.818327	6.54551	-19.2275	2.34955e-57	6.22918e-56	119.701
SMIM5	1.11852	9.92538	19.2252	2.40372e-57	6.36459e-56	119.678
GPC2	-1.02488	7.77978	-19.2146	2.65857e-57	7.03032e-56	119.578
KIF2C	1.06789	3.22021	19.2112	2.74567e-57	7.25131e-56	119.545
PDS5A	0.861837	7.98983	19.2051	2.91258e-57	7.68226e-56	119.487
ELOVL7	1.25729	12.3293	19.192	3.30068e-57	8.69332e-56	119.362
EXO1	1.63747	3.62898	19.1919	3.30437e-57	8.69332e-56	119.361
SRA1	0.840432	9.75492	19.1772	3.80244e-57	9.97812e-56	119.221
POSTN	-1.17212	7.33478	-19.165	4.27233e-57	1.11542e-55	119.104
SMC4	0.890202	7.15493	19.1607	4.45295e-57	1.1611e-55	119.063
PHYHIP	-3.12865	6.30032	-19.1552	4.69276e-57	1.22077e-55	119.011
LYRM9	-0.777265	6.4797	-19.1552	4.69368e-57	1.22077e-55	119.01
CDH26	0.803423	2.80415	19.1536	4.76624e-57	1.23808e-55	118.995
KIF4A	2.66203	7.74443	19.1213	6.49192e-57	1.67785e-55	118.687
TCEAL3	-1.09589	7.26082	-19.1147	6.91561e-57	1.78511e-55	118.624
PAK3	-1.04408	3.76505	-19.1093	7.27965e-57	1.87673e-55	118.572
NPY1R	-1.23941	10.236	-19.107	7.44429e-57	1.91676e-55	118.55
ATP11B	1.52011	9.39063	19.0991	8.02155e-57	2.06281e-55	118.476
NRBF2	1.98387	7.97358	19.0541	1.23347e-56	3.15618e-55	118.046
CCND1	-0.659957	6.19076	-19.041	1.39894e-56	3.57512e-55	117.921
STS	1.61724	6.09114	19.0371	1.45244e-56	3.70723e-55	117.883
NDC1	0.976253	8.52768	19.0348	1.48373e-56	3.78241e-55	117.862
ASCC3	1.08259	7.26486	19.0336	1.501e-56	3.8217e-55	117.85
MAP1B	-1.51658	8.52666	-19.0205	1.70183e-56	4.32767e-55	117.725
KIF23	1.08387	4.43249	19.0153	1.78896e-56	4.5436e-55	117.675
CD83	2.23124	8.31389	19.0095	1.89014e-56	4.79465e-55	117.62
ARHGEF40	-0.999647	7.52399	-19.0017	2.03783e-56	5.16292e-55	117.545
LMNB2	1.87483	5.042	18.9867	2.35138e-56	5.94997e-55	117.403
SPATA6L	0.817948	3.80383	18.9621	2.97334e-56	7.51453e-55	117.168
RELL2	1.09698	3.99747	18.9426	3.58514e-56	9.04961e-55	116.982
PLLP	-2.1084	8.50273	-18.9408	3.64696e-56	9.1831e-55	116.965
MX2	2.36016	8.77381	18.9401	3.66969e-56	9.22903e-55	116.958
DHRS9	3.55208	6.6352	18.9332	3.92055e-56	9.84785e-55	116.892
PPP2R2C	0.739178	5.25368	18.9282	4.11498e-56	1.03236e-54	116.844
FARP1	-0.899141	5.27708	-18.9278	4.12782e-56	1.03432e-54	116.841
CSK	0.772927	11.1748	18.9205	4.42767e-56	1.1081e-54	116.771
GATB	0.931944	9.3442	18.9106	4.86763e-56	1.21673e-54	116.676
CDC20	1.48971	7.03912	18.9078	4.99787e-56	1.24777e-54	116.65
LAMB4	-0.776656	5.21459	-18.8976	5.51144e-56	1.37431e-54	116.553
TACC1	-1.0512	7.43233	-18.8866	6.12308e-56	1.52314e-54	116.448
NTM	-0.76405	5.03965	-18.8789	6.58911e-56	1.63708e-54	116.374
MEAK7	0.858877	4.59794	18.8729	6.98314e-56	1.73288e-54	116.316
DTWD1	-0.66056	4.71612	-18.8649	7.5359e-56	1.86779e-54	116.24
GOT1	0.890792	11.1104	18.8584	8.02049e-56	1.9855e-54	116.178
RPL23AP32	-1.40604	8.01491	-18.8563	8.1838e-56	2.0235e-54	116.158
ATP6V1G1	1.11602	9.86961	18.8559	8.21009e-56	2.02756e-54	116.155
BNIP3	0.844093	10.5733	18.8547	8.30585e-56	2.04874e-54	116.143
CASP4	0.626568	7.54353	18.8498	8.70742e-56	2.14522e-54	116.096
DPH3	1.21006	7.77038	18.8491	8.76529e-56	2.15689e-54	116.09
MAPK7	1.2447	7.82458	18.8451	9.11e-56	2.23666e-54	116.051
ACOX3	1.01504	8.05193	18.8451	9.11123e-56	2.23666e-54	116.051
STXBP6	-1.272	5.19715	-18.8442	9.18615e-56	2.25236e-54	116.043
ZNF529	-0.671144	5.74829	-18.8377	9.77571e-56	2.39406e-54	115.981
PLA2G3	2.12003	9.99318	18.8363	9.90452e-56	2.42272e-54	115.968
SORBS2	-1.33979	5.81247	-18.8281	1.07176e-55	2.61848e-54	115.889
ENPP5	-1.51908	3.65283	-18.8215	1.14147e-55	2.78549e-54	115.826
HMGCS2	-1.7672	4.04298	-18.8179	1.1814e-55	2.8795e-54	115.792
DBNL	1.68149	6.83078	18.8098	1.27706e-55	3.10899e-54	115.714
SLCO4A1	0.845568	4.8799	18.8026	1.36796e-55	3.32632e-54	115.645
C11orf80	-1.37071	7.29887	-18.7974	1.43686e-55	3.48972e-54	115.596
EPHX3	2.07512	11.4512	18.7912	1.52431e-55	3.69776e-54	115.537
ADD3	-1.21941	10.1882	-18.7895	1.5506e-55	3.75709e-54	115.52
CORO2A	1.05467	8.26942	18.7786	1.71979e-55	4.16213e-54	115.417
ERBB4	-0.996723	2.79776	-18.7706	1.85737e-55	4.48981e-54	115.34
SARM1	-0.673327	4.22188	-18.7542	2.17252e-55	5.24546e-54	115.184
EXOSC3	0.738812	5.46772	18.743	2.41878e-55	5.82634e-54	115.077
PSMD2	0.586139	11.9474	18.7315	2.70025e-55	6.49671e-54	114.967
KDM7A-DT	1.33572	8.24077	18.7076	3.39054e-55	8.148e-54	114.74
IL19	3.98229	4.12987	18.7036	3.52366e-55	8.44815e-54	114.701
SEPTIN11	-0.942604	7.01003	-18.7011	3.60838e-55	8.64119e-54	114.678
NAT1	1.47131	7.06023	18.6752	4.62409e-55	1.10607e-53	114.43
FGFBP2	-2.93364	7.46226	-18.6493	5.92563e-55	1.4141e-53	114.183
POU6F1	-0.696511	5.27811	-18.6472	6.04328e-55	1.4405e-53	114.163
CENPF	1.06843	5.52964	18.639	6.53364e-55	1.55378e-53	114.085
SPAG5	1.59339	6.8697	18.6266	7.35722e-55	1.74762e-53	113.967
BUB1	0.596976	2.66595	18.6241	7.53669e-55	1.78818e-53	113.943
NUDT15	0.778975	10.4006	18.6183	7.96534e-55	1.8877e-53	113.888
HSD11B1	-4.35466	6.79928	-18.6167	8.09065e-55	1.91519e-53	113.872
IFITM10	0.870333	4.01898	18.6009	9.40996e-55	2.22237e-53	113.721
MTO1	0.863206	8.14426	18.6006	9.4356e-55	2.22587e-53	113.719
RHOG	1.39115	9.51962	18.5926	1.01835e-54	2.3968e-53	113.642
CRISPLD1	-2.40886	6.04219	-18.5806	1.14222e-54	2.68527e-53	113.528
DTL	1.64194	5.50094	18.5804	1.1444e-54	2.6873e-53	113.526
TTC28	-0.707377	6.01572	-18.5632	1.34939e-54	3.16505e-53	113.362
ANKRD22	1.58703	10.5774	18.5631	1.351e-54	3.16522e-53	113.36
IFIH1	0.855446	5.26747	18.5437	1.62578e-54	3.80467e-53	113.176
SNRPG	0.622345	11.6458	18.5422	1.64958e-54	3.85597e-53	113.161
ANG	-1.90848	8.86296	-18.5316	1.82494e-54	4.26103e-53	113.06
ASPM	1.4005	5.39837	18.5312	1.83239e-54	4.27356e-53	113.056
TRAK2	-0.926089	9.17113	-18.5193	2.05275e-54	4.78207e-53	112.943
APOBEC3B	2.36083	6.54082	18.512	2.20079e-54	5.12115e-53	112.874
TSPYL5	-1.02885	10.2144	-18.5028	2.40301e-54	5.58536e-53	112.786
CDH3	1.51472	10.4505	18.4925	2.65246e-54	6.15821e-53	112.687
IFRD2	1.27207	8.42875	18.4734	3.18534e-54	7.37871e-53	112.505
MYLK	-0.726149	6.31116	-18.4639	3.48607e-54	8.06626e-53	112.415
ATG3	0.651852	9.08948	18.4565	3.74207e-54	8.64884e-53	112.344
RAI2	-1.76487	8.98238	-18.452	3.90881e-54	9.01395e-53	112.3
SYT17	-1.68891	3.97128	-18.4502	3.97405e-54	9.15412e-53	112.284
ITPR2	-0.926926	8.30563	-18.4403	4.36924e-54	1.00532e-52	112.189
DDX28	0.616019	3.98093	18.431	4.77425e-54	1.09483e-52	112.101
STAT3	1.08456	8.55318	18.4253	5.04507e-54	1.15564e-52	112.046
CKAP2L	2.00914	4.19536	18.4228	5.167e-54	1.18225e-52	112.022
LTF	4.27269	9.80365	18.4195	5.33231e-54	1.21872e-52	111.991
MYO1E	0.985473	8.49992	18.4185	5.38183e-54	1.22867e-52	111.981
PTS	0.763655	10.9085	18.4124	5.70489e-54	1.30098e-52	111.923
FAM174B	-1.02977	9.00898	-18.4103	5.82067e-54	1.32591e-52	111.903
FBXO32	-1.16746	4.95618	-18.4048	6.13739e-54	1.39651e-52	111.85
BCL3	0.720454	5.9616	18.396	6.67076e-54	1.5162e-52	111.767
C12orf75	1.98829	8.58678	18.3821	7.62399e-54	1.73094e-52	111.634
RAD51AP1	1.94165	7.24628	18.3789	7.86181e-54	1.78296e-52	111.603
HIF3A	-1.30754	3.55788	-18.3736	8.26322e-54	1.87193e-52	111.554
SLC28A3	1.39627	7.20816	18.368	8.72126e-54	1.97352e-52	111.5
USP18	2.15947	5.37471	18.3529	1.00755e-53	2.27747e-52	111.356
SRPK1	0.903287	9.69285	18.3425	1.11233e-53	2.51155e-52	111.257
PNISR	-0.834028	10.5528	-18.3389	1.152e-53	2.59826e-52	111.222
MMP12	4.04254	5.02265	18.337	1.17254e-53	2.64169e-52	111.204
CGNL1	-1.73595	9.56493	-18.3328	1.22068e-53	2.74413e-52	111.164
TMEM117	1.17398	10.8258	18.3291	1.26463e-53	2.83982e-52	111.129
RAET1E	2.1033	4.85384	18.3278	1.28062e-53	2.87259e-52	111.116
WIF1	-4.18073	6.98013	-18.3233	1.33679e-53	2.9953e-52	111.074
ZFAND3	1.06102	5.80648	18.317	1.42003e-53	3.17835e-52	111.013
PACC1	0.796278	5.26382	18.3159	1.43505e-53	3.20848e-52	111.003
ZNF528	-0.782378	9.82991	-18.31	1.51892e-53	3.3923e-52	110.946
NR2F2	-0.815869	8.66587	-18.3091	1.53209e-53	3.41801e-52	110.938
LAD1	1.4764	10.1744	18.3064	1.57187e-53	3.50295e-52	110.912
CTSD	1.12193	9.4824	18.3052	1.58921e-53	3.53776e-52	110.901
PTP4A1	0.834862	7.94375	18.305	1.59214e-53	3.54045e-52	110.899
TPM1	-0.81481	7.60683	-18.2975	1.71146e-53	3.79756e-52	110.827
CYSTM1	-0.972925	10.822	-18.2952	1.74936e-53	3.87747e-52	110.805
TMEM255A	-2.17882	5.50704	-18.2924	1.79647e-53	3.97759e-52	110.779
SMC2	0.722788	5.76766	18.2843	1.94063e-53	4.29216e-52	110.702
MYADM	-1.09683	11.0824	-18.2778	2.06507e-53	4.55444e-52	110.64
FTSJ1	0.89768	8.91751	18.2778	2.06587e-53	4.55444e-52	110.639
SDC4	-0.976772	12.1384	-18.2631	2.37788e-53	5.22549e-52	110.499
TIMM13	0.604219	6.29856	18.2482	2.74183e-53	6.01885e-52	110.357
SAMD8	1.15147	7.52328	18.2469	2.7759e-53	6.08713e-52	110.345
SIRT7	0.764908	8.57935	18.2454	2.81555e-53	6.16749e-52	110.33
HSPBP1	1.43565	5.7184	18.243	2.8808e-53	6.30371e-52	110.308
NUDT5	0.664277	10.6669	18.2389	2.99663e-53	6.54526e-52	110.268
CCDC50	-1.0295	8.2565	-18.2249	3.42326e-53	7.46686e-52	110.135
DNMT1	1.04133	8.75059	18.2176	3.67028e-53	7.99716e-52	110.066
CH25H	2.21121	7.22898	18.2164	3.71526e-53	8.07805e-52	110.054
DCTD	0.965454	7.73803	18.2132	3.82869e-53	8.31586e-52	110.024
TRIM2	-0.607084	5.15871	-18.2095	3.96584e-53	8.60465e-52	109.989
ATG2A	1.02639	6.39237	18.2083	4.01199e-53	8.6956e-52	109.977
MACO1	0.783967	9.51019	18.1994	4.3684e-53	9.45812e-52	109.892
DOK3	0.989684	4.31358	18.1978	4.43831e-53	9.59937e-52	109.876
CD3D	2.70615	7.75953	18.192	4.68732e-53	1.01273e-51	109.822
FBXO5	1.16695	5.88906	18.19	4.77956e-53	1.03049e-51	109.802
MITF	-0.639758	7.50034	-18.1569	6.55828e-53	1.41103e-51	109.487
ZNF561	1.37288	8.05977	18.1377	7.87536e-53	1.69263e-51	109.304
S100A2	0.933545	14.0658	18.1349	8.09115e-53	1.73537e-51	109.277
CBX6	-0.808251	9.04414	-18.1335	8.20273e-53	1.75747e-51	109.264
BRIP1	1.19024	4.75914	18.128	8.64494e-53	1.85029e-51	109.211
PELI2	-0.675247	5.71371	-18.1236	9.01498e-53	1.92748e-51	109.169
CAB39L	-1.23646	4.39584	-18.1021	1.10646e-52	2.36324e-51	108.965
DESI1	1.06271	8.00812	18.0871	1.27764e-52	2.7232e-51	108.821
PLEKHH1	-0.975585	9.8484	-18.0677	1.53703e-52	3.26929e-51	108.637
RUNX1T1	-0.841493	5.74421	-18.0672	1.54527e-52	3.28342e-51	108.632
HK2	0.627616	5.67514	18.0633	1.60386e-52	3.40438e-51	108.595
FAHD2CP	-0.755347	5.05211	-18.05	1.82118e-52	3.85772e-51	108.468
SLC14A1	-2.80188	4.43203	-18.042	1.96477e-52	4.15757e-51	108.392
NKIRAS2	0.836499	8.49626	18.0204	2.41481e-52	5.09416e-51	108.186
GPR87	0.894325	11.3845	18.0198	2.43061e-52	5.12222e-51	108.18
SEMA4B	0.83138	10.5656	18.0137	2.57513e-52	5.41983e-51	108.122
SMIM13	0.64091	5.46038	18.0136	2.5771e-52	5.41983e-51	108.121
LOC101928487	1.72007	4.46249	17.9924	3.15758e-52	6.62705e-51	107.919
ZNF615	-0.807876	8.1589	-17.9807	3.52886e-52	7.39873e-51	107.808
TXNL4B	1.2924	6.23714	17.9798	3.55849e-52	7.45325e-51	107.8
LIPG	3.35556	5.55844	17.9746	3.74053e-52	7.82654e-51	107.75
TMEM43	-0.636896	8.29564	-17.9699	3.91394e-52	8.18105e-51	107.705
SPRYD4	1.45692	6.45635	17.9659	4.06381e-52	8.48568e-51	107.667
LMO4	-0.883299	6.74347	-17.965	4.09985e-52	8.55225e-51	107.658
SLC37A2	1.7284	7.4287	17.9569	4.43112e-52	9.23389e-51	107.581
CAV1	-0.84417	12.0299	-17.951	4.68775e-52	9.75877e-51	107.525
ETHE1	1.67017	5.589	17.933	5.56807e-52	1.1568e-50	107.353
CXCL9	4.01257	6.47799	17.9277	5.85462e-52	1.21387e-50	107.303
WDSUB1	-0.766673	9.99083	-17.9261	5.94397e-52	1.23116e-50	107.288
ATAD2	0.918824	5.97358	17.9058	7.21782e-52	1.4905e-50	107.094
MFSD4A-AS1	-2.4802	4.00691	-17.905	7.275e-52	1.5008e-50	107.086
ZNF224	-0.665613	7.20938	-17.8888	8.48613e-52	1.74539e-50	106.933
SMAP1	0.655404	11.7496	17.8877	8.57641e-52	1.76219e-50	106.922
LTB4R	1.14383	9.19786	17.8824	9.02546e-52	1.85261e-50	106.871
GCNT2	-0.59069	5.42622	-17.8804	9.19949e-52	1.88645e-50	106.852
PKP3	1.05246	7.44588	17.8697	1.01826e-51	2.08596e-50	106.751
NDRG4	1.74606	8.75946	17.8656	1.05919e-51	2.16765e-50	106.711
DLC1	-0.805082	6.10933	-17.8455	1.28343e-51	2.61978e-50	106.52
KPTN	1.10532	5.50944	17.8455	1.28394e-51	2.61978e-50	106.519
FEM1B	0.744087	9.66642	17.8272	1.52886e-51	3.11333e-50	106.345
ADCY2	-0.660755	4.43401	-17.8245	1.56863e-51	3.19116e-50	106.32
TTC5	-0.607361	6.08752	-17.8198	1.64057e-51	3.33421e-50	106.275
PRODH	-1.41977	8.72988	-17.813	1.75002e-51	3.55313e-50	106.21
CDT1	1.19637	4.2833	17.812	1.76764e-51	3.58536e-50	106.2
ATOH8	-0.623174	3.58229	-17.8113	1.77928e-51	3.60542e-50	106.194
LINC01215	2.27364	4.5847	17.8058	1.87387e-51	3.79335e-50	106.142
CASP7	0.930829	11.1135	17.8035	1.91619e-51	3.87519e-50	106.12
NAP1L2	-1.14339	7.94351	-17.7838	2.31234e-51	4.66716e-50	105.933
GRPEL1	0.907046	9.65715	17.7678	2.69333e-51	5.42548e-50	105.78
MYH14	-1.2999	7.12603	-17.7663	2.73392e-51	5.49646e-50	105.765
CACNA2D1	-0.721087	5.51875	-17.7616	2.85935e-51	5.74302e-50	105.721
B3GAT3	-0.774082	9.00582	-17.7562	3.00957e-51	6.03293e-50	105.67
ATOX1	0.790149	11.4292	17.7538	3.08063e-51	6.16938e-50	105.646
COQ4	0.828208	7.73609	17.7369	3.61798e-51	7.23843e-50	105.486
FRA10AC1	-0.630872	6.07104	-17.7299	3.8697e-51	7.7195e-50	105.419
P2RY2	1.4518	3.21531	17.7296	3.87882e-51	7.73018e-50	105.417
MRPS15	0.717628	9.83878	17.7191	4.28641e-51	8.52594e-50	105.317
SVIP	-1.47813	5.67703	-17.7182	4.3255e-51	8.59536e-50	105.308
ALDH1A3	0.993958	5.93664	17.713	4.54674e-51	9.01755e-50	105.258
TGFA	1.25885	5.11067	17.7104	4.65977e-51	9.23282e-50	105.234
POLQ	0.857923	2.96501	17.7087	4.7351e-51	9.37303e-50	105.218
PNPT1	2.00539	7.54696	17.7079	4.77212e-51	9.43723e-50	105.21
RPL31	-0.847112	8.72529	-17.6942	5.43865e-51	1.07347e-49	105.079
MRTO4	0.633497	5.21369	17.6883	5.75275e-51	1.13437e-49	105.023
MRPL4	1.10105	6.48221	17.6847	5.95649e-51	1.17342e-49	104.989
CALHM6	1.89699	5.88348	17.6703	6.83217e-51	1.34464e-49	104.852
RFX3	-0.624356	5.40873	-17.668	6.98014e-51	1.37245e-49	104.83
TNNT2	-0.886508	4.32264	-17.6657	7.1337e-51	1.4013e-49	104.809
GPR183	1.93044	7.57329	17.6636	7.27829e-51	1.42834e-49	104.789
VKORC1L1	-0.58745	6.14057	-17.6618	7.40812e-51	1.45243e-49	104.771
TMEM185B	1.04374	6.62952	17.6602	7.51887e-51	1.47274e-49	104.756
ABCB6	0.69613	5.18743	17.6537	8.0029e-51	1.56605e-49	104.694
ZSCAN18	-0.718688	4.52759	-17.6526	8.08844e-51	1.58129e-49	104.683
ROPN1B	-2.55822	6.08322	-17.6473	8.50298e-51	1.66075e-49	104.634
C21orf91	1.05817	9.30851	17.6436	8.80879e-51	1.71721e-49	104.598
ATP13A5	-1.18942	3.40524	-17.6371	9.37862e-51	1.82656e-49	104.536
COTL1	0.962284	7.52956	17.6245	1.05731e-50	2.05725e-49	104.416
DHFR	1.09757	8.81807	17.6236	1.06624e-50	2.07266e-49	104.408
FASTKD5	1.11195	8.58209	17.6221	1.08136e-50	2.10007e-49	104.394
ZFAND2A	1.09849	9.63701	17.6074	1.24501e-50	2.4156e-49	104.253
TMEM132C	-2.19026	5.90819	-17.5997	1.33943e-50	2.5939e-49	104.18
UBE2C	1.65467	7.40184	17.5877	1.50195e-50	2.90317e-49	104.066
RNF150	-1.24937	4.44296	-17.5775	1.65523e-50	3.19342e-49	103.969
TRAM2-AS1	-1.29225	7.98653	-17.5576	2.00169e-50	3.85462e-49	103.779
C8orf44	-0.659377	5.54493	-17.5506	2.13924e-50	4.11563e-49	103.713
COBL	-1.39502	7.18255	-17.5454	2.24722e-50	4.30723e-49	103.664
ATG4A	0.654583	8.70465	17.5376	2.42055e-50	4.62652e-49	103.59
XPO4	0.958399	7.20836	17.5348	2.48782e-50	4.75068e-49	103.563
ATP1A2	-1.4089	5.04456	-17.5248	2.73544e-50	5.21868e-49	103.468
EME1	0.594218	7.58698	17.5106	3.13383e-50	5.97317e-49	103.332
ACACB	-0.690502	6.62894	-17.5028	3.37393e-50	6.42485e-49	103.259
TLE1	-0.60462	4.65356	-17.5011	3.43012e-50	6.52581e-49	103.242
SLC23A2	1.29805	4.27052	17.493	3.70436e-50	7.04103e-49	103.165
HMGB3	1.40084	6.28451	17.492	3.74165e-50	7.10534e-49	103.155
DDIAS	2.10735	3.79124	17.4846	4.01278e-50	7.61316e-49	103.086
MAPRE1	0.793768	9.7328	17.4811	4.14818e-50	7.8628e-49	103.053
KRT14	0.909191	14.1445	17.4551	5.31558e-50	1.00385e-48	102.805
SOX6	-0.674177	4.61887	-17.4541	5.36636e-50	1.01251e-48	102.796
TRAPPC3	0.608066	10.3838	17.4538	5.3855e-50	1.01519e-48	102.792
ESRP1	0.606732	12.1874	17.4429	5.97039e-50	1.12442e-48	102.689
STK32B	-1.41758	5.19453	-17.44	6.14252e-50	1.15577e-48	102.661
SPRR1A	2.4419	13.1044	17.4369	6.32443e-50	1.18891e-48	102.632
UTP4	0.683946	11.1338	17.4362	6.36493e-50	1.19443e-48	102.626
GREB1L	-0.65588	3.20712	-17.4362	6.36541e-50	1.19443e-48	102.625
NCAPH2	0.645085	4.87133	17.4358	6.38926e-50	1.19781e-48	102.622
NUSAP1	1.3248	8.70041	17.4352	6.42562e-50	1.20353e-48	102.616
FANCI	0.672375	6.93476	17.4328	6.57799e-50	1.22983e-48	102.593
2024-03-02	-1.27239	5.29494	-17.4326	6.59002e-50	1.23096e-48	102.591
CCNYL1	1.06068	7.94712	17.4308	6.70446e-50	1.25119e-48	102.574
HMBS	1.70117	8.07633	17.417	7.643e-50	1.42376e-48	102.443
RPL22L1	1.0674	11.9777	17.4129	7.9478e-50	1.4792e-48	102.404
CD2	2.37523	5.8955	17.4064	8.45442e-50	1.57206e-48	102.342
COX5A	0.973788	10.0549	17.4041	8.64207e-50	1.6055e-48	102.32
SLIRP	0.67811	12.3312	17.3901	9.87493e-50	1.83123e-48	102.187
TMEM8B	-0.61777	4.0847	-17.3795	1.09248e-49	2.0241e-48	102.087
PSMA7	0.641521	11.312	17.3718	1.17616e-49	2.1752e-48	102.013
IFI44L	2.79502	9.17719	17.3697	1.1998e-49	2.21694e-48	101.993
UHRF1	1.12668	8.9881	17.3551	1.37822e-49	2.53976e-48	101.855
CDC42EP1	1.211	8.0016	17.3542	1.39024e-49	2.5596e-48	101.846
CYB5R4	0.928613	6.11641	17.3367	1.64352e-49	3.02322e-48	101.679
DPP3	1.16087	7.90801	17.3324	1.71162e-49	3.14568e-48	101.639
ANKRD33B	-2.21565	3.28569	-17.3318	1.72084e-49	3.15979e-48	101.633
TTC1	0.723007	10.9157	17.3233	1.8671e-49	3.4253e-48	101.552
MCM5	1.30122	5.9869	17.3103	2.11346e-49	3.8738e-48	101.428
FAHD2A	-0.914834	6.22557	-17.2942	2.46333e-49	4.51105e-48	101.276
CPEB2	0.90135	7.01784	17.2936	2.4767e-49	4.5315e-48	101.27
MALL	1.197	11.5817	17.2929	2.4934e-49	4.558e-48	101.264
DIXDC1	-0.830225	3.76082	-17.2917	2.52203e-49	4.60623e-48	101.252
DLG3	0.919923	7.64429	17.2888	2.5928e-49	4.73129e-48	101.225
USP38	1.07772	7.74464	17.2882	2.60835e-49	4.75544e-48	101.219
CERS3	1.43035	11.3016	17.2716	3.05472e-49	5.56429e-48	101.061
LDLRAD3	-0.637134	11.6181	-17.2641	3.28102e-49	5.96066e-48	100.99
CYB5R2	0.858036	11.0279	17.2513	3.70603e-49	6.72684e-48	100.868
DNASE1L3	1.07564	5.96954	17.2453	3.92237e-49	7.11323e-48	100.812
SOX13	-0.757547	5.84883	-17.2446	3.94996e-49	7.15695e-48	100.805
PRIM1	1.34378	7.18181	17.242	4.04648e-49	7.32537e-48	100.781
RAB7B	0.976669	7.18668	17.2304	4.52199e-49	8.17898e-48	100.67
SEMA3E	-2.06794	4.24611	-17.2288	4.58899e-49	8.29288e-48	100.655
ALDH4A1	0.824168	5.56007	17.2029	5.87154e-49	1.06013e-47	100.409
GLTP	0.680797	13.3369	17.2019	5.93179e-49	1.07007e-47	100.399
KLF9	-0.660436	5.05663	-17.2005	6.00769e-49	1.08281e-47	100.386
KCTD5	0.593242	5.06151	17.2001	6.03279e-49	1.08638e-47	100.382
DZIP1L	-1.56691	3.91031	-17.1975	6.18339e-49	1.11252e-47	100.358
PIGX	1.11125	7.18752	17.1953	6.31592e-49	1.13537e-47	100.336
DBF4	1.0559	8.57404	17.1792	7.36192e-49	1.32109e-47	100.184
ADGRL3	-1.68327	5.40953	-17.1749	7.66801e-49	1.37482e-47	100.143
BOC	-0.592935	7.23409	-17.1697	8.0571e-49	1.44332e-47	100.094
SPIRE1	0.919202	6.61969	17.168	8.18418e-49	1.46481e-47	100.078
ITPRIPL2	-0.728431	7.34373	-17.1678	8.2002e-49	1.4664e-47	100.076
MAPKAP1	0.631516	5.09602	17.1438	1.03089e-48	1.83921e-47	99.8478
UST	-0.956849	5.15906	-17.1438	1.03118e-48	1.83921e-47	99.8475
MRPL46	0.93655	9.52819	17.1405	1.06333e-48	1.8949e-47	99.8169
GPRASP2	-0.719913	10.4937	-17.1382	1.08725e-48	1.93586e-47	99.7947
WFS1	-0.758948	7.16606	-17.1219	1.26929e-48	2.25802e-47	99.6403
PRKAG2-AS1	-0.710233	3.97884	-17.1059	1.47895e-48	2.62645e-47	99.4878
IL12RB1	0.767522	3.87242	17.1031	1.51875e-48	2.6948e-47	99.4614
SERPINB8	1.22794	5.76373	17.0965	1.61735e-48	2.86728e-47	99.3986
CDH19	-1.02618	3.59325	-17.0946	1.64617e-48	2.91585e-47	99.381
RPS6KB2	0.881747	8.69804	17.0805	1.88287e-48	3.32938e-47	99.247
PLCD4	2.18677	7.35577	17.0803	1.88526e-48	3.33074e-47	99.2457
TRMT10C	0.646785	10.4682	17.0779	1.92993e-48	3.40672e-47	99.2224
CBR3-AS1	0.666399	4.82597	17.0641	2.19952e-48	3.87927e-47	99.092
TLR2	1.88842	5.18285	17.0485	2.55133e-48	4.4959e-47	98.944
CLDN23	-1.23562	5.86166	-17.0403	2.76011e-48	4.85548e-47	98.8655
SLC43A1	-1.52343	5.52078	-17.0008	4.01696e-48	7.04837e-47	98.4912
FZD1	-0.87075	6.35941	-16.9907	4.4208e-48	7.73716e-47	98.3957
VARS	0.59709	5.06347	16.9898	4.4601e-48	7.7993e-47	98.3869
ZDHHC11	-2.09746	8.13971	-16.9846	4.68458e-48	8.17792e-47	98.3379
NCALD	-0.887979	5.69843	-16.977	5.03703e-48	8.77828e-47	98.2655
YKT6	0.828145	6.20875	16.9766	5.05481e-48	8.8018e-47	98.262
AMD1	0.735633	9.55766	16.9689	5.44078e-48	9.44986e-47	98.1886
AS3MT	-0.938627	8.33756	-16.9463	6.74579e-48	1.16967e-46	97.9742
FHDC1	1.21351	10.4728	16.9431	6.95272e-48	1.20453e-46	97.9441
DDB2	-1.07598	7.82839	-16.9429	6.96337e-48	1.20536e-46	97.9426
SLC27A1	-1.12234	7.88715	-16.9312	7.78149e-48	1.34584e-46	97.8318
KRT78	1.5036	10.0757	16.9157	9.0227e-48	1.5592e-46	97.6842
IVL	2.22759	11.4752	16.9153	9.05477e-48	1.56343e-46	97.6806
HR	0.843987	8.90301	16.8996	1.05126e-47	1.81363e-46	97.5317
ID1	2.30166	8.57686	16.8962	1.08515e-47	1.86895e-46	97.5001
STEAP1B	2.43122	5.41492	16.8927	1.12204e-47	1.93087e-46	97.4667
FERMT1	0.890884	7.81065	16.8918	1.13159e-47	1.94567e-46	97.4583
TCF12	-0.703469	8.65769	-16.8898	1.15311e-47	1.98102e-46	97.4395
CPSF2	0.8735	8.22138	16.8895	1.15663e-47	1.98541e-46	97.4365
PEX13	0.809702	6.73795	16.882	1.24187e-47	2.12994e-46	97.3655
LOC100506100	1.11908	4.34634	16.8787	1.28196e-47	2.19687e-46	97.3339
TK2	-0.616419	7.38125	-16.8772	1.30072e-47	2.22716e-46	97.3194
GDPD2	-1.30812	9.1295	-16.8762	1.31285e-47	2.24605e-46	97.3101
GZMA	2.67703	5.83168	16.8681	1.41802e-47	2.42397e-46	97.2333
KCTD21	1.98999	6.97914	16.8556	1.59629e-47	2.72643e-46	97.1152
TP53I3	1.55283	8.15001	16.8441	1.77966e-47	3.0371e-46	97.0067
MTCL1	1.85893	8.99005	16.844	1.78255e-47	3.03951e-46	97.0051
TRIM25	0.758106	7.48973	16.842	1.81638e-47	3.09463e-46	96.9863
ZNF185	0.765832	12.3085	16.84	1.85179e-47	3.15234e-46	96.9671
CTSF	-1.03542	8.83204	-16.8328	1.98186e-47	3.36817e-46	96.8994
TOLLIP	0.691784	6.84407	16.8183	2.27443e-47	3.85901e-46	96.7621
DPAGT1	0.636295	10.2563	16.8101	2.45966e-47	4.16642e-46	96.684
RNF126	0.667488	6.14205	16.8041	2.60408e-47	4.40741e-46	96.6271
TROAP	0.907457	3.25599	16.7816	3.22168e-47	5.43927e-46	96.4148
KBTBD8	1.54816	4.60095	16.7814	3.22928e-47	5.44761e-46	96.4125
MUC7	-2.30823	3.68577	-16.7761	3.39686e-47	5.72562e-46	96.362
PTRH2	0.989597	10.0766	16.7687	3.64361e-47	6.12646e-46	96.2921
MYEOV	-1.14675	3.31661	-16.7675	3.68468e-47	6.19045e-46	96.2809
UGCG	0.903267	11.4536	16.7649	3.77697e-47	6.34032e-46	96.2562
PSMG1	0.859425	10.5199	16.7473	4.465e-47	7.48917e-46	96.0893
EMX2	-1.53691	9.03852	-16.7427	4.66213e-47	7.81345e-46	96.0462
LOC286437	-1.32156	8.17194	-16.7311	5.20342e-47	8.7135e-46	95.9367
ECT2	0.760095	4.64688	16.7185	5.86499e-47	9.80536e-46	95.8173
UBE2T	1.63066	6.11897	16.7075	6.51267e-47	1.08793e-45	95.7129
TAP1	0.814608	10.6418	16.702	6.85944e-47	1.14493e-45	95.6611
PMCH	1.21423	3.06276	16.6915	7.58097e-47	1.26434e-45	95.5614
LYSMD2	0.855464	5.23375	16.6806	8.4024e-47	1.4002e-45	95.4588
NDFIP1	-0.593905	10.8298	-16.6762	8.76402e-47	1.45927e-45	95.4168
SLC18B1	0.610787	10.9168	16.6758	8.79496e-47	1.46324e-45	95.4132
C1orf115	-0.698308	4.60996	-16.6637	9.86812e-47	1.64045e-45	95.2984
THRA	-0.692078	5.51154	-16.6625	9.98228e-47	1.65809e-45	95.287
RAB25	0.809221	12.9315	16.6613	1.00882e-46	1.67432e-45	95.2764
PCNA	0.650825	10.7961	16.6586	1.03588e-46	1.71786e-45	95.25
MAP2K4	0.910482	9.14041	16.6552	1.06895e-46	1.77126e-45	95.2187
BEX4	-0.947361	7.64188	-16.6531	1.09105e-46	1.80642e-45	95.1983
BMP2K	0.709677	7.10762	16.645	1.17774e-46	1.94682e-45	95.122
CHD6	-0.667014	6.89963	-16.6328	1.3222e-46	2.17861e-45	95.0067
ACP1	0.666832	7.88061	16.6326	1.32469e-46	2.18096e-45	95.0048
FGF2	-0.658769	5.12777	-16.6255	1.4174e-46	2.33173e-45	94.9373
FRMD3	-1.00884	5.33612	-16.6244	1.43256e-46	2.35478e-45	94.9267
CBX7	-1.19985	9.80251	-16.6241	1.43674e-46	2.35977e-45	94.9238
ZNF84	-0.804737	8.8608	-16.6225	1.45829e-46	2.39325e-45	94.909
HSPA14	0.610342	8.1915	16.6103	1.63706e-46	2.68448e-45	94.7936
NOTCH2NLA	-0.604639	13.3668	-16.5975	1.84796e-46	3.02791e-45	94.6728
COL21A1	-1.37982	9.74086	-16.5915	1.95671e-46	3.19844e-45	94.6158
LRRN1	-1.83029	4.94994	-16.5859	2.06293e-46	3.3694e-45	94.563
DHRS12	-0.749288	5.33972	-16.5851	2.07811e-46	3.3888e-45	94.5557
SMA4	-0.861129	6.36077	-16.5801	2.1802e-46	3.55247e-45	94.5079
SLPI	1.13525	12.6968	16.567	2.46869e-46	4.00665e-45	94.384
SH3BGRL3	0.77788	12.5746	16.565	2.5147e-46	4.07489e-45	94.3656
FASTKD1	0.858599	11.1653	16.5553	2.75589e-46	4.4622e-45	94.2742
FBXW11	0.645045	7.44374	16.5517	2.8536e-46	4.61314e-45	94.2395
HS3ST6	-2.1477	4.3449	-16.5485	2.94027e-46	4.74951e-45	94.2096
C12orf4	0.82508	9.55692	16.5442	3.06301e-46	4.94389e-45	94.1689
MCM10	1.12667	3.39018	16.5434	3.08573e-46	4.97665e-45	94.1615
UBN2	-0.705917	5.99133	-16.5387	3.22565e-46	5.19416e-45	94.1173
MND1	1.2688	5.75706	16.5135	4.0977e-46	6.57777e-45	93.8786
PPIL1	0.987582	9.38299	16.5003	4.64147e-46	7.43902e-45	93.7544
EPHA1	0.645353	3.96548	16.497	4.79039e-46	7.67172e-45	93.7229
ZWINT	0.987455	10.825	16.4961	4.82912e-46	7.72772e-45	93.7149
CCL22	2.12507	8.97715	16.493	4.97346e-46	7.94632e-45	93.6855
FGD3	0.80006	4.55533	16.4912	5.05981e-46	8.078e-45	93.6683
SELENBP1	-1.20919	8.50902	-16.4735	5.98195e-46	9.52062e-45	93.5014
UGT1A10	1.90002	7.0684	16.468	6.30537e-46	1.00137e-44	93.4489
DYNLT1	0.587013	11.1293	16.468	6.30639e-46	1.00137e-44	93.4487
HIBADH	-0.645594	5.81441	-16.4666	6.38552e-46	1.01315e-44	93.4363
SCN7A	-1.03043	5.50439	-16.4597	6.81666e-46	1.08073e-44	93.3711
GPCPD1	1.061	8.44849	16.4565	7.03067e-46	1.11379e-44	93.3403
DCAF16	-0.849495	6.64197	-16.4526	7.29699e-46	1.15509e-44	93.3032
LYPD6B	-1.10299	10.3258	-16.4514	7.38062e-46	1.16743e-44	93.2918
THBD	1.14516	10.7355	16.4395	8.2566e-46	1.30398e-44	93.18
MLKL	1.76916	9.14551	16.4369	8.45933e-46	1.33498e-44	93.1558
R3HDM4	0.79826	9.64674	16.4293	9.09349e-46	1.43285e-44	93.0837
CTSB	0.674468	10.9893	16.4257	9.40915e-46	1.48145e-44	93.0497
TGFBI	-0.715581	12.8259	-16.4203	9.89837e-46	1.55729e-44	92.9992
TSPAN7	-1.07336	9.65174	-16.4195	9.97437e-46	1.56804e-44	92.9915
DFFA	0.605075	6.54699	16.4174	1.01796e-45	1.59908e-44	92.9712
AACS	-0.712842	10.8122	-16.4136	1.05498e-45	1.65471e-44	92.9356
ACADL	-1.47203	3.26746	-16.4084	1.10852e-45	1.73736e-44	92.8862
ZNF320	-0.935603	7.68746	-16.4029	1.16797e-45	1.82775e-44	92.8341
CSNK1G2	0.651517	7.5254	16.4005	1.19479e-45	1.8683e-44	92.8115
STX19	1.52952	7.74731	16.3897	1.32341e-45	2.06784e-44	92.7095
HTATIP2	0.715033	7.75605	16.3838	1.39921e-45	2.18462e-44	92.654
REC8	0.755061	3.60472	16.3834	1.40412e-45	2.19063e-44	92.6505
XKRX	2.06326	8.77598	16.3753	1.51604e-45	2.36343e-44	92.574
ZFP36	0.850689	11.0892	16.3744	1.52857e-45	2.38116e-44	92.5658
BORA	1.49931	7.50578	16.3686	1.61552e-45	2.51471e-44	92.5107
CORT	0.673927	5.84234	16.3632	1.69963e-45	2.64362e-44	92.4601
GSTA3	-2.85853	8.15133	-16.3521	1.8889e-45	2.93358e-44	92.3548
ACOT2	-2.59108	6.50615	-16.3485	1.95449e-45	3.03316e-44	92.3207
SLC7A1	0.737524	7.32587	16.3468	1.98609e-45	3.07986e-44	92.3047
COA7	1.07878	6.88978	16.346	1.99957e-45	3.0961e-44	92.298
ZNF14	-0.95896	7.50108	-16.3436	2.04636e-45	3.16466e-44	92.2749
RHBDF2	1.01826	7.97554	16.3269	2.39562e-45	3.69818e-44	92.1178
ABCG4	0.770352	2.94914	16.3256	2.42725e-45	3.74419e-44	92.1047
NBEA	-1.33409	4.87582	-16.3234	2.47598e-45	3.81365e-44	92.0849
SLC36A4	0.758208	6.56337	16.3214	2.52447e-45	3.88542e-44	92.0656
SLC16A1	1.01151	7.67144	16.3175	2.61937e-45	4.02845e-44	92.0288
MCM2	1.18408	8.64645	16.3169	2.63329e-45	4.04635e-44	92.0235
SEC23B	0.782818	9.76304	16.3146	2.69128e-45	4.12978e-44	92.0017
CXCR6	0.738352	2.85002	16.297	3.17932e-45	4.86777e-44	91.8356
CRYZL2P	-0.748609	4.07807	-16.2966	3.1903e-45	4.87732e-44	91.8321
LCK	1.13642	3.44399	16.2842	3.58876e-45	5.47832e-44	91.7148
SDC2	-1.43473	7.73734	-16.284	3.59563e-45	5.48474e-44	91.7129
INHBB	-1.74246	5.28808	-16.2818	3.67091e-45	5.59541e-44	91.6922
BTBD16	-2.28172	3.89344	-16.281	3.69731e-45	5.63148e-44	91.6851
ERI1	0.941655	5.67767	16.2778	3.81326e-45	5.80379e-44	91.6543
BTBD19	1.09632	4.33668	16.2746	3.9303e-45	5.97749e-44	91.6241
G6PD	1.65719	5.11658	16.2639	4.34939e-45	6.60998e-44	91.5231
SLC31A1	1.24353	8.75159	16.2598	4.51821e-45	6.86146e-44	91.4851
ENTPD7	0.873266	6.06198	16.2581	4.59317e-45	6.97015e-44	91.4687
CDKN1A	0.839895	12.0316	16.255	4.72995e-45	7.17241e-44	91.4395
OSMR	0.845056	6.34403	16.2541	4.76889e-45	7.22614e-44	91.4313
TLE2	-1.25414	6.04868	-16.2455	5.17186e-45	7.83097e-44	91.3504
PDF	1.29171	9.20192	16.2331	5.81786e-45	8.80262e-44	91.233
PSMB10	1.17519	7.53003	16.2278	6.11785e-45	9.2429e-44	91.1829
C19orf18	-1.29714	5.58339	-16.2226	6.42141e-45	9.69439e-44	91.1346
TCF19	1.02073	6.7062	16.209	7.3028e-45	1.10089e-43	91.0064
KBTBD6	-1.14188	7.50634	-16.207	7.44287e-45	1.11954e-43	90.9874
PPP1R1B	-2.34975	7.07153	-16.206	7.51261e-45	1.1292e-43	90.9781
FXYD6	-1.68016	7.97626	-16.1983	8.08441e-45	1.21426e-43	90.905
AKAP2	-0.751076	8.04707	-16.1971	8.17347e-45	1.22674e-43	90.8941
AR	-1.03915	6.08444	-16.191	8.66205e-45	1.29912e-43	90.8362
GPAT3	1.69133	9.2984	16.1907	8.68136e-45	1.30106e-43	90.8339
EIF4E3	-1.0506	8.208	-16.1905	8.70073e-45	1.30302e-43	90.8317
ASPA	-1.38277	7.79883	-16.1872	8.97624e-45	1.3433e-43	90.8006
LINC00937	-0.592829	4.73844	-16.1827	9.36878e-45	1.4e-43	90.758
RBMS3	-0.786339	5.51557	-16.1751	1.00573e-44	1.50071e-43	90.6872
LONRF2	-0.988986	3.19841	-16.1739	1.01756e-44	1.51725e-43	90.6756
FAM210A	0.745673	7.23033	16.172	1.03634e-44	1.54414e-43	90.6574
AP1B1	0.803208	9.78579	16.168	1.07638e-44	1.60148e-43	90.6195
FILIP1	-1.02261	3.76721	-16.1675	1.08147e-44	1.60789e-43	90.6148
E2F7	0.990932	4.15104	16.167	1.08645e-44	1.61412e-43	90.6103
FZD7	-1.2123	9.19823	-16.1589	1.17218e-44	1.74023e-43	90.5345
ZNF652	-1.49475	8.93353	-16.1582	1.18079e-44	1.75175e-43	90.5272
BCKDK	1.08639	8.65595	16.1553	1.21322e-44	1.79857e-43	90.5002
MRPL42	0.611797	10.0648	16.1548	1.21843e-44	1.80499e-43	90.4959
SETBP1	-0.850144	8.64184	-16.1544	1.22295e-44	1.81037e-43	90.4923
RUVBL1	1.4496	8.14085	16.1453	1.33376e-44	1.97276e-43	90.4058
SPNS2	1.16373	8.69911	16.1376	1.4341e-44	2.11684e-43	90.3335
ROPN1	-1.70755	3.85591	-16.1317	1.51549e-44	2.23537e-43	90.2784
CAVIN1	-1.14607	9.76465	-16.1304	1.534e-44	2.26105e-43	90.2663
HAPLN3	1.4224	5.84764	16.13	1.53983e-44	2.26802e-43	90.2625
TBC1D20	0.70583	8.84606	16.1282	1.5671e-44	2.30654e-43	90.245
GBA2	0.826185	8.86627	16.1158	1.76192e-44	2.59142e-43	90.1282
CCL2	1.39148	10.4869	16.1149	1.77577e-44	2.60992e-43	90.1204
TBC1D24	-0.595774	5.95072	-16.1119	1.82694e-44	2.6813e-43	90.092
OSR1	-1.66085	8.38282	-16.1024	1.99806e-44	2.93035e-43	90.0028
KLHL24	-0.603919	7.05931	-16.1016	2.01409e-44	2.95174e-43	89.9948
APCDD1	-0.861908	9.76317	-16.1014	2.01759e-44	2.95281e-43	89.9931
LPP	-0.60203	6.75215	-16.1014	2.01769e-44	2.95281e-43	89.993
LYAR	1.00564	7.84859	16.0997	2.04993e-44	2.99786e-43	89.9772
PDK4	-0.999619	5.42718	-16.0994	2.05577e-44	3.00426e-43	89.9744
CSTF1	0.590404	8.69658	16.0954	2.13508e-44	3.11573e-43	89.9366
DEPDC1	0.98632	3.56055	16.0942	2.16045e-44	3.15052e-43	89.9249
HYLS1	1.12405	5.09734	16.0928	2.18858e-44	3.18928e-43	89.912
UCA1	2.34839	3.47793	16.089	2.26826e-44	3.30305e-43	89.8763
NR4A3	0.833831	3.36565	16.0814	2.43593e-44	3.54469e-43	89.8052
SP110	0.931234	7.58926	16.0803	2.46188e-44	3.57992e-43	89.7946
ZNF626	-0.730288	4.33459	-16.0783	2.5098e-44	3.64702e-43	89.7754
MXRA7	-0.676984	8.10646	-16.0756	2.57442e-44	3.73827e-43	89.7501
RRP36	0.719803	7.37229	16.0704	2.70397e-44	3.92085e-43	89.7011
PLCB4	-1.05016	4.99745	-16.0693	2.73265e-44	3.95965e-43	89.6906
PAIP2B	-1.37761	8.51529	-16.0655	2.83155e-44	4.10006e-43	89.6551
LINC00592	2.528	7.64459	16.0644	2.86123e-44	4.14013e-43	89.6448
LBH	-0.8994	8.6361	-16.0592	3.00361e-44	4.34002e-43	89.5963
CNKSR2	-0.636326	2.67172	-16.0564	3.08547e-44	4.45518e-43	89.5695
TNIP2	0.919419	8.31251	16.0448	3.4418e-44	4.95924e-43	89.4606
IFIT5	0.945273	10.4184	16.042	3.53431e-44	5.0854e-43	89.4341
PRELP	-1.13239	8.6919	-16.0397	3.61052e-44	5.19142e-43	89.4128
PREP	0.985737	7.88037	16.0386	3.64872e-44	5.24267e-43	89.4023
TM9SF4	1.01187	8.57298	16.0258	4.11711e-44	5.91155e-43	89.2819
SLC6A16	-1.58141	4.62382	-16.0233	4.21686e-44	6.05055e-43	89.2581
TUBBP5	1.71271	3.52949	16.0178	4.43837e-44	6.36393e-43	89.207
RASGEF1B	1.12612	4.68535	16.0131	4.64326e-44	6.65307e-43	89.162
PPP1R3C	-0.789397	5.35459	-16.0089	4.82912e-44	6.91456e-43	89.1229
RND3	0.639352	12.1135	15.9964	5.43351e-44	7.77454e-43	89.0053
LAMTOR4	-1.10744	11.7908	-15.9957	5.46627e-44	7.8159e-43	88.9993
MCTP2	0.716085	4.95252	15.9957	5.47003e-44	7.8159e-43	88.9986
DET1	-0.712921	3.35859	-15.9952	5.49725e-44	7.84933e-43	88.9937
NBR1	-0.600912	7.13878	-15.9768	6.53487e-44	9.31797e-43	88.8213
FAM189A2	-1.88012	8.4569	-15.9703	6.9475e-44	9.89946e-43	88.7602
GINS1	1.30794	9.55195	15.9664	7.20546e-44	1.02528e-42	88.7239
AKT3	-0.611221	5.35525	-15.9624	7.48444e-44	1.06424e-42	88.686
CRCT1	2.62925	11.1583	15.9593	7.70975e-44	1.09552e-42	88.6564
ACSS3	-1.07164	3.97474	-15.9394	9.29946e-44	1.3205e-42	88.4695
LRR1	0.635551	4.26183	15.9374	9.47553e-44	1.34179e-42	88.4508
NFIC	-0.692365	10.2838	-15.9372	9.49453e-44	1.34355e-42	88.4488
YAF2	0.650957	3.91378	15.9366	9.54438e-44	1.34968e-42	88.4436
BBX	-0.786307	6.51056	-15.931	1.00597e-43	1.4206e-42	88.3912
PXDC1	-0.629279	10.0874	-15.9198	1.11811e-43	1.57787e-42	88.2858
ESPL1	1.60256	5.75909	15.9132	1.19031e-43	1.6786e-42	88.2234
TMEM225B	-1.34211	3.12838	-15.9117	1.20743e-43	1.70158e-42	88.2092
C1orf116	0.800289	9.22717	15.9115	1.2089e-43	1.70248e-42	88.208
CA13	-0.647016	5.67327	-15.9056	1.27876e-43	1.79963e-42	88.152
FRZB	-1.22672	5.5876	-15.9042	1.29554e-43	1.822e-42	88.139
EMC3	-0.607983	8.13718	-15.9036	1.30226e-43	1.83021e-42	88.1338
EXOSC7	-1.01009	10.1521	-15.9035	1.30423e-43	1.83171e-42	88.1323
HEBP1	-0.689381	10.5066	-15.8944	1.42102e-43	1.99439e-42	88.0468
MAD2L1	0.828568	5.31194	15.8939	1.42743e-43	2.002e-42	88.0423
PRMT3	1.04524	8.84679	15.8922	1.45083e-43	2.03344e-42	88.0261
CMBL	-0.598654	6.17112	-15.8901	1.47956e-43	2.07229e-42	88.0065
CACNA2D3	1.51139	4.29363	15.8874	1.51716e-43	2.12351e-42	87.9815
SYNPO2	-0.998224	7.5503	-15.8868	1.52601e-43	2.13443e-42	87.9757
TXNDC16	-0.75701	9.06356	-15.8865	1.53022e-43	2.13887e-42	87.973
GPR1	1.43733	7.42286	15.8849	1.55386e-43	2.17043e-42	87.9577
ETNK1	0.663336	6.17658	15.8795	1.63412e-43	2.281e-42	87.9075
TIMELESS	0.67553	5.01198	15.8748	1.70909e-43	2.38241e-42	87.8628
SLAIN1	-1.13134	5.63055	-15.861	1.94517e-43	2.70782e-42	87.7338
NME1	0.612234	12.5164	15.8605	1.95436e-43	2.71877e-42	87.7291
TSTA3	0.780627	9.72495	15.8562	2.03631e-43	2.83086e-42	87.6881
TRUB2	0.653711	7.14965	15.8535	2.08812e-43	2.89895e-42	87.6631
CDYL	0.719013	8.97981	15.8436	2.29176e-43	3.17953e-42	87.5703
DENND5A	-0.623888	10.6679	-15.8423	2.31997e-43	3.21649e-42	87.5581
HJURP	1.41108	4.30159	15.8402	2.36596e-43	3.27804e-42	87.5385
SF3B3	0.654846	8.37437	15.8284	2.64422e-43	3.65864e-42	87.4277
LBHD1	0.588617	10.5083	15.8209	2.83651e-43	3.92206e-42	87.3577
SYBU	-1.29332	6.59425	-15.8204	2.84981e-43	3.9378e-42	87.353
CYP4F22	2.16095	10.4737	15.8121	3.08256e-43	4.25368e-42	87.2747
ELF3	1.49155	5.13783	15.8107	3.12273e-43	4.30622e-42	87.2618
ADIRF	-1.03351	12.9108	-15.7942	3.64922e-43	5.0255e-42	87.1065
NUBP1	0.641237	8.77649	15.7832	4.04635e-43	5.56495e-42	87.0035
PRKAG2	-0.644244	4.38374	-15.777	4.28882e-43	5.89447e-42	86.9455
PSMB8-AS1	0.767904	5.83954	15.773	4.45221e-43	6.11086e-42	86.9082
SUV39H2	0.592453	4.73534	15.7721	4.49184e-43	6.15703e-42	86.8994
MIR17HG	1.02716	5.21114	15.7681	4.66075e-43	6.38429e-42	86.8626
ILRUN	0.863361	8.17758	15.7664	4.73858e-43	6.48659e-42	86.8461
OTUB1	0.664716	8.143	15.7591	5.07254e-43	6.93912e-42	86.7782
RTN4IP1	1.03951	5.75703	15.7534	5.35412e-43	7.3097e-42	86.7243
PLP1	-1.87712	8.63402	-15.7499	5.53513e-43	7.54681e-42	86.6912
CKB	-0.7647	9.9754	-15.7465	5.71457e-43	7.78113e-42	86.6594
KIAA1324	-1.36588	4.53443	-15.7441	5.8407e-43	7.9476e-42	86.6376
ADRB1	-0.605032	3.21525	-15.7372	6.23693e-43	8.48116e-42	86.5722
MDFI	1.4306	4.29847	15.7368	6.26018e-43	8.50714e-42	86.5685
ZSCAN31	1.54856	8.60063	15.7253	6.97582e-43	9.46711e-42	86.4605
KIAA0895	-1.31151	6.53678	-15.7107	7.99952e-43	1.08278e-41	86.324
C15orf48	2.26078	11.0975	15.7088	8.14595e-43	1.10188e-41	86.3059
DNAJB1	0.736764	10.6853	15.7044	8.48969e-43	1.14762e-41	86.2647
MRPL51	0.669531	10.7913	15.7007	8.79037e-43	1.18748e-41	86.23
POLR3GL	-0.731933	9.5407	-15.684	1.02762e-42	1.38729e-41	86.0744
FZD8	-0.877193	3.81259	-15.6834	1.03388e-42	1.39482e-41	86.0683
TRAM1L1	-1.55503	7.29787	-15.669	1.18402e-42	1.59528e-41	85.9331
ABCA5	-0.94444	10.0039	-15.6613	1.27244e-42	1.71329e-41	85.8613
SNRPD1	0.68926	9.77311	15.6611	1.275e-42	1.71515e-41	85.8593
CLSTN2	-1.40984	3.47762	-15.6598	1.29048e-42	1.73304e-41	85.8473
MAEA	0.684585	10.8775	15.6561	1.33659e-42	1.79262e-41	85.8123
PLEK	1.00513	5.47863	15.6552	1.34743e-42	1.80598e-41	85.8042
ATIC	0.623368	11.213	15.6465	1.46229e-42	1.9561e-41	85.7227
ARHGEF26	-1.05252	7.4869	-15.6379	1.58557e-42	2.11962e-41	85.642
ATL1	-0.859169	9.1516	-15.6308	1.69371e-42	2.26125e-41	85.5762
MOSPD1	0.675152	8.14498	15.6301	1.70498e-42	2.27482e-41	85.5696
CALML3	0.75804	7.48581	15.6178	1.91489e-42	2.55157e-41	85.4539
EIF6	0.829364	11.9288	15.6083	2.09317e-42	2.78191e-41	85.3651
DPH2	1.06317	8.50991	15.6066	2.1268e-42	2.82296e-41	85.3492
SLC25A10	0.709433	3.2668	15.606	2.13888e-42	2.83716e-41	85.3436
RNASE7	2.9584	8.27194	15.5947	2.37736e-42	3.14334e-41	85.2382
TBC1D12	1.2976	6.64329	15.5927	2.422e-42	3.19825e-41	85.2197
ZC3H6	-0.815227	7.50303	-15.5914	2.45147e-42	3.23509e-41	85.2076
ARHGEF7	-0.63333	4.55373	-15.591	2.46198e-42	3.24688e-41	85.2033
C3orf70	-0.728769	6.41145	-15.5906	2.47138e-42	3.25718e-41	85.1995
CCDC51	1.09415	6.88616	15.5776	2.79035e-42	3.67286e-41	85.0785
CAPN15	0.767185	3.55869	15.5722	2.93624e-42	3.86242e-41	85.0277
CEP78	0.788453	5.42551	15.5714	2.95842e-42	3.8891e-41	85.0202
SLC39A6	1.49323	8.95174	15.5699	2.99949e-42	3.94057e-41	85.0065
SOX8	-1.74658	4.00112	-15.5694	3.01471e-42	3.95804e-41	85.0014
SYT8	-1.63223	5.31273	-15.5678	3.06137e-42	4.01673e-41	84.9861
SH2D4A	0.90171	9.61686	15.5642	3.16551e-42	4.15072e-41	84.9528
OLFM1	0.811368	6.1305	15.5614	3.25052e-42	4.25947e-41	84.9264
CHP2	-1.65453	11.1638	-15.5474	3.70702e-42	4.85147e-41	84.7954
TAF5L	0.651575	8.36538	15.5422	3.89215e-42	5.08728e-41	84.7468
ZNF420	-0.714911	6.34869	-15.5386	4.02452e-42	5.25361e-41	84.7134
SRGAP1	-0.599027	3.09915	-15.5385	4.02911e-42	5.25626e-41	84.7123
CAT	-0.718591	7.97367	-15.5382	4.04031e-42	5.26753e-41	84.7095
LEPROTL1	0.63017	10.8246	15.538	4.04794e-42	5.27414e-41	84.7077
HSPA4	0.798412	8.44778	15.5329	4.24692e-42	5.52988e-41	84.6598
IFI30	0.929807	10.7343	15.5285	4.4228e-42	5.74433e-41	84.6194
TMEM208	0.712401	9.08966	15.5212	4.73852e-42	6.1505e-41	84.5506
HMOX1	1.85512	9.35384	15.5196	4.81164e-42	6.24146e-41	84.5354
REN	2.76341	3.47856	15.5111	5.20701e-42	6.7458e-41	84.4566
SPIN4	1.35581	9.4416	15.5064	5.44547e-42	7.04141e-41	84.412
KCTD11	1.10796	9.84786	15.5055	5.4889e-42	7.09311e-41	84.4041
BRD3	-0.630145	7.24386	-15.496	5.99888e-42	7.74726e-41	84.3155
GRN	1.02774	10.3797	15.4936	6.13948e-42	7.92386e-41	84.2924
ATP6V0A4	-2.1521	9.23436	-15.491	6.28854e-42	8.10606e-41	84.2685
IL26	1.53811	3.56402	15.4897	6.36584e-42	8.19542e-41	84.2563
FOLH1	1.08843	4.23099	15.4878	6.4794e-42	8.33118e-41	84.2387
RFC4	0.733758	10.1901	15.4829	6.78244e-42	8.70993e-41	84.1932
ENSA	0.782157	10.1957	15.4829	6.78778e-42	8.71134e-41	84.1924
INTS13	0.658313	9.77726	15.4754	7.2791e-42	9.33606e-41	84.1227
RNMT	0.786246	7.60362	15.4676	7.82942e-42	1.00356e-40	84.0501
ZNF471	-0.723968	3.29362	-15.464	8.10007e-42	1.03696e-40	84.0162
ZNF589	0.680896	6.33024	15.4613	8.30815e-42	1.06227e-40	83.9909
PLEKHG5	-0.813883	4.41613	-15.4529	8.98503e-42	1.14811e-40	83.9128
GPR146	-1.15193	7.59543	-15.4424	9.9193e-42	1.26513e-40	83.8142
TSPAN14	-0.674946	8.32739	-15.4409	1.00553e-41	1.28167e-40	83.8006
EHD1	0.61673	6.05867	15.4337	1.07541e-41	1.36989e-40	83.7337
SULT2B1	1.83851	10.9069	15.4245	1.17245e-41	1.49259e-40	83.6475
SEMA4A	0.589006	5.38327	15.4174	1.25347e-41	1.59277e-40	83.5809
EREG	1.69395	7.2046	15.4125	1.31166e-41	1.66568e-40	83.5357
KBTBD7	-0.735554	6.88268	-15.4103	1.33934e-41	1.69978e-40	83.5149
PRSS8	1.46992	8.90038	15.4087	1.35918e-41	1.72389e-40	83.5002
EGF	-1.60362	3.80031	-15.4057	1.39805e-41	1.771e-40	83.4721
MSRB3	-0.640907	4.32408	-15.3968	1.51921e-41	1.92212e-40	83.3893
TNFSF12	-0.774237	8.03873	-15.3914	1.59868e-41	2.02018e-40	83.3385
SLC25A36	-0.846877	7.15017	-15.3684	1.98189e-41	2.50134e-40	83.1243
NFASC	0.630621	5.12005	15.3671	2.00693e-41	2.52984e-40	83.1118
PDZD2	-0.987311	8.35641	-15.3556	2.23477e-41	2.81531e-40	83.0046
RASAL1	0.630156	5.19391	15.3468	2.42654e-41	3.05466e-40	82.9225
CXCL17	2.27772	3.53542	15.3451	2.46528e-41	3.1e-40	82.9067
RNASEH2A	0.884853	7.41095	15.338	2.63449e-41	3.30672e-40	82.8406
SESTD1	-1.02798	8.21075	-15.3365	2.67173e-41	3.35141e-40	82.8266
IFITM1	0.714704	11.9337	15.3318	2.79114e-41	3.49847e-40	82.783
RNF19B	0.921926	8.81992	15.329	2.86573e-41	3.58819e-40	82.7567
YOD1	0.882442	5.37944	15.3259	2.95073e-41	3.69237e-40	82.7276
IL1B	2.60156	3.66028	15.3244	2.99189e-41	3.74159e-40	82.7138
SNRK	-0.752277	6.47827	-15.3235	3.01747e-41	3.77129e-40	82.7053
ENPP4	-1.49882	5.59213	-15.3156	3.24938e-41	4.0562e-40	82.6315
SEMA3G	-1.42172	9.88857	-15.3042	3.61461e-41	4.50391e-40	82.5253
PCP4L1	2.80908	9.03372	15.3039	3.62324e-41	4.51192e-40	82.5229
MPZ	-1.97586	7.54672	-15.2896	4.14267e-41	5.14628e-40	82.3894
SCGB2A1	-3.98276	6.50699	-15.2852	4.31619e-41	5.35859e-40	82.3485
TMOD3	0.688919	7.75313	15.2811	4.48696e-41	5.56724e-40	82.3098
CPE	-1.3401	9.59197	-15.2807	4.50037e-41	5.58051e-40	82.3068
SNAP29	0.701218	9.1706	15.2756	4.721e-41	5.84704e-40	82.2591
UBE2D1	0.589809	6.62315	15.2683	5.05485e-41	6.25298e-40	82.191
IDE	1.26852	11.6033	15.2633	5.29756e-41	6.54534e-40	82.1443
EIF2S2	0.616225	8.93915	15.2632	5.30237e-41	6.54734e-40	82.1434
EPCAM	-1.94038	8.97514	-15.252	5.88925e-41	7.25459e-40	82.0387
NKTR	-0.605665	6.62534	-15.2401	6.58129e-41	8.10221e-40	81.928
IGSF11	-1.54154	3.97431	-15.2373	6.75437e-41	8.3103e-40	81.9021
NPHP3	-0.638024	6.15957	-15.2333	7.00866e-41	8.61801e-40	81.8653
CREBRF	-0.864377	6.57967	-15.2221	7.7839e-41	9.53702e-40	81.7607
SHPK	0.926816	9.16952	15.2207	7.88729e-41	9.65793e-40	81.7476
MIR181A2HG	-1.51077	3.5159	-15.219	8.01252e-41	9.80543e-40	81.7319
AKAP13	-0.588622	6.68486	-15.2179	8.09588e-41	9.89566e-40	81.7215
ROR1	-0.646429	3.85816	-15.2117	8.57799e-41	1.04787e-39	81.6639
GPC6	-1.03704	3.95829	-15.2093	8.76907e-41	1.06994e-39	81.6419
RAC2	0.926102	5.99179	15.204	9.21757e-41	1.12333e-39	81.5922
SAMD9L	1.32367	6.80612	15.1948	1.00469e-40	1.22368e-39	81.5063
DBN1	-1.21419	6.63783	-15.1913	1.0382e-40	1.26374e-39	81.4736
CXCL14	-0.727444	12.2713	-15.1861	1.08987e-40	1.32506e-39	81.4252
LOC100507557	-1.43256	4.70853	-15.1858	1.09231e-40	1.32724e-39	81.423
NR2F2-AS1	-1.58176	3.95431	-15.1839	1.11221e-40	1.34983e-39	81.405
EFEMP1	-0.820793	8.53205	-15.1822	1.12961e-40	1.37013e-39	81.3895
FBN2	0.927063	3.33497	15.1812	1.13994e-40	1.38103e-39	81.3805
ARHGAP6	-0.668548	4.53183	-15.1794	1.15922e-40	1.40357e-39	81.3637
OSBPL8	-0.679668	9.5993	-15.1737	1.2235e-40	1.48052e-39	81.31
PARP14	0.652793	6.61757	15.1631	1.35084e-40	1.63173e-39	81.2113
COX10	0.928763	8.70243	15.1626	1.35684e-40	1.63801e-39	81.2069
EBF1	-1.18572	9.21229	-15.157	1.42928e-40	1.72446e-39	81.155
CBLC	0.77069	4.38746	15.1514	1.50647e-40	1.81652e-39	81.1026
METTL1	1.03625	5.64915	15.1495	1.53272e-40	1.84709e-39	81.0854
RAB5A	0.734065	10.1799	15.1468	1.57204e-40	1.89336e-39	81.0601
HSPH1	0.851529	8.82501	15.1464	1.57756e-40	1.8989e-39	81.0566
IGFBP5	-1.34151	8.2613	-15.1457	1.58819e-40	1.91057e-39	81.0499
ZKSCAN1	-1.0271	8.18656	-15.1456	1.58989e-40	1.91077e-39	81.0489
PNPO	0.952877	9.12527	15.1456	1.59021e-40	1.91077e-39	81.0487
EFNA5	-0.59784	8.39609	-15.136	1.73864e-40	2.08545e-39	80.9597
CSF2RA	0.640323	2.91246	15.1281	1.87127e-40	2.24324e-39	80.8865
ATP2A3	-1.10888	5.03455	-15.1247	1.93146e-40	2.31404e-39	80.8549
NCAPG2	0.784146	10.2358	15.1232	1.9585e-40	2.34506e-39	80.8411
MRRF	0.801826	8.98941	15.1146	2.12378e-40	2.54148e-39	80.7603
FKBP1B	1.68167	8.58338	15.1116	2.18406e-40	2.6121e-39	80.7324
KCTD12	-0.729561	11.8378	-15.1105	2.20474e-40	2.6353e-39	80.723
CSNK1E	0.710755	8.70386	15.1088	2.24002e-40	2.67591e-39	80.7072
TXNRD3	0.688793	4.09261	15.108	2.25673e-40	2.6943e-39	80.6998
DNAJC11	0.773743	7.78952	15.1078	2.26262e-40	2.69977e-39	80.6972
RHBDL2	1.19861	6.15026	15.0967	2.50845e-40	2.99136e-39	80.5944
BYSL	1.26366	4.91198	15.0956	2.53531e-40	3.02163e-39	80.5838
F11R	0.770001	10.4093	15.0955	2.53751e-40	3.0225e-39	80.5829
TNS2	-1.3283	8.34419	-15.0898	2.67487e-40	3.18243e-39	80.5304
KDM7A	0.98344	9.69987	15.0878	2.72584e-40	3.2412e-39	80.5116
APOD	-1.18537	13.2522	-15.0848	2.80219e-40	3.33005e-39	80.484
SLC26A2	-1.88848	7.28956	-15.0829	2.8529e-40	3.38836e-39	80.4662
MSMB	-3.26661	5.0492	-15.0828	2.85565e-40	3.38966e-39	80.4652
TOM1	1.45353	7.36304	15.0822	2.87069e-40	3.40554e-39	80.46
MRPL17	0.649513	9.32069	15.0808	2.91041e-40	3.45067e-39	80.4463
PGM5-AS1	-1.43121	3.60031	-15.0617	3.47604e-40	4.11418e-39	80.2693
GFRA1	-1.14065	5.71718	-15.0565	3.64831e-40	4.31559e-39	80.2211
EFHD2	0.78209	5.82409	15.0521	3.80174e-40	4.49449e-39	80.18
ESRRG	-1.51201	4.53981	-15.051	3.83981e-40	4.53428e-39	80.1701
CDK2AP2	0.914292	8.18079	15.047	3.98725e-40	4.70569e-39	80.1325
TUBG2	1.47331	8.44012	15.0463	4.01106e-40	4.73107e-39	80.1266
RMND5A	0.847872	8.73909	15.0301	4.66451e-40	5.49552e-39	79.9762
NUP210	0.676313	4.08607	15.0277	4.77206e-40	5.619e-39	79.9534
STK32A	-0.808724	3.73967	-15.023	4.98333e-40	5.86104e-39	79.9103
NAPSB	1.16102	3.24788	15.0225	5.00656e-40	5.885e-39	79.9056
NAA50	0.786819	9.48073	15.0111	5.56671e-40	6.53595e-39	79.7999
TMEM19	0.889531	7.48761	15.0102	5.61355e-40	6.58718e-39	79.7916
TSPAN8	-2.28153	9.80281	-15.0081	5.72817e-40	6.71785e-39	79.7714
LDB3	-0.64983	3.25458	-15.0077	5.74595e-40	6.73485e-39	79.7684
RNF128	-1.26216	8.68229	-15.0067	5.80227e-40	6.79699e-39	79.7586
DGCR11	1.39159	5.45924	15.006	5.84014e-40	6.83745e-39	79.7521
SLAMF8	1.36104	6.1259	14.9965	6.3768e-40	7.45726e-39	79.6645
ZNF703	-0.795964	11.9791	-14.996	6.4076e-40	7.48902e-39	79.6597
FAM83F	0.900526	3.06825	14.994	6.53228e-40	7.6304e-39	79.6405
CDR1	-1.67815	9.8212	-14.9935	6.56213e-40	7.66092e-39	79.636
HCCS	0.695427	8.10094	14.9917	6.67296e-40	7.78146e-39	79.6193
TMPRSS13	0.708085	5.38002	14.9815	7.33277e-40	8.54118e-39	79.5253
ABCA9	-1.005	5.72981	-14.975	7.78922e-40	9.06258e-39	79.4651
GLRX2	0.824038	10.0784	14.9689	8.24922e-40	9.59235e-39	79.408
HOXC4	-0.607776	9.61336	-14.9608	8.89374e-40	1.03243e-38	79.333
RMI2	1.17783	8.9018	14.9423	1.05617e-39	1.22467e-38	79.1617
ZHX2	-0.711171	7.79764	-14.9388	1.091e-39	1.26435e-38	79.1293
PIGA	0.738416	9.91116	14.9387	1.09213e-39	1.26494e-38	79.1283
ACADSB	-0.803734	7.8076	-14.9298	1.18689e-39	1.37238e-38	79.0454
CSF2RB	1.19269	9.64007	14.9146	1.36654e-39	1.57301e-38	78.9049
BBS4	-0.677521	7.81084	-14.9123	1.39651e-39	1.60662e-38	78.8833
LINC01278	-0.865413	5.57713	-14.911	1.41294e-39	1.6246e-38	78.8717
ANKEF1	0.719386	4.16655	14.9101	1.42473e-39	1.63725e-38	78.8634
TMEM167A	0.731985	10.5428	14.903	1.52299e-39	1.74821e-38	78.7969
APOE	-0.843374	8.01097	-14.8935	1.66231e-39	1.90599e-38	78.7097
SLC25A25	1.1633	6.15446	14.8887	1.739e-39	1.99171e-38	78.6647
ALDH6A1	-0.719185	5.26345	-14.8847	1.80465e-39	2.06461e-38	78.6278
CROT	0.966735	7.39373	14.8847	1.80467e-39	2.06461e-38	78.6278
UCK2	1.44456	9.36025	14.8808	1.87176e-39	2.14018e-38	78.5914
GTF2H1	0.644134	9.26941	14.8674	2.11888e-39	2.42139e-38	78.4678
TRMT9B	-0.776719	3.48853	-14.8671	2.12609e-39	2.42828e-38	78.4644
LMNB1	0.991393	9.70854	14.8586	2.30016e-39	2.62417e-38	78.386
TMEM167B	-0.674681	11.0686	-14.8576	2.3217e-39	2.64728e-38	78.3767
PPFIBP1	-0.794308	5.82406	-14.8496	2.50133e-39	2.85052e-38	78.3025
MAGED2	-0.591264	8.97484	-14.8414	2.69839e-39	3.07168e-38	78.2269
EPN2	-0.589476	5.59942	-14.8374	2.80094e-39	3.18489e-38	78.1897
E2F8	1.53269	6.88313	14.8357	2.84511e-39	3.23332e-38	78.1741
SKI	-0.646928	10.1804	-14.8125	3.52827e-39	4.00085e-38	77.9597
FEN1	1.04594	6.95957	14.8124	3.53062e-39	4.0013e-38	77.959
PTGR1	0.782849	8.2243	14.8093	3.63444e-39	4.11669e-38	77.9301
ATP6V1B2	0.734082	11.5665	14.8048	3.78977e-39	4.28791e-38	77.8884
LINC00518	0.885812	3.19508	14.8024	3.87662e-39	4.38376e-38	77.8659
TMEM65	0.989182	7.22283	14.7952	4.14478e-39	4.68442e-38	77.7992
ARHGAP20	-1.02202	3.49452	-14.7886	4.40502e-39	4.9758e-38	77.7385
ZNFX1	0.630069	9.89541	14.7779	4.86374e-39	5.48793e-38	77.6398
SLC30A1	0.660453	7.54351	14.7725	5.11578e-39	5.76915e-38	77.5895
RAD51	0.677804	4.06371	14.7701	5.23055e-39	5.89271e-38	77.5673
BTBD11	1.10194	9.08105	14.7701	5.23108e-39	5.89271e-38	77.5672
GATA6	-0.818319	4.01125	-14.7622	5.62859e-39	6.33702e-38	77.4943
P2RY1	1.80943	6.04764	14.7612	5.67968e-39	6.39104e-38	77.4853
FAM185A	-0.871716	3.60303	-14.76	5.74227e-39	6.45793e-38	77.4743
CHL1	-0.845688	6.03614	-14.759	5.79601e-39	6.51481e-38	77.4651
C9orf152	-1.89233	3.54905	-14.7585	5.82113e-39	6.53947e-38	77.4607
TANGO6	1.00552	3.62861	14.7557	5.97392e-39	6.70744e-38	77.4349
NFKBIZ	0.721513	11.3906	14.7543	6.0538e-39	6.79342e-38	77.4217
ANKRD36B	-0.83525	10.5009	-14.7513	6.22544e-39	6.98221e-38	77.3938
CDC42BPA	-0.677061	5.61294	-14.7374	7.08094e-39	7.93737e-38	77.2655
HYI	-0.809741	8.62289	-14.7302	7.57308e-39	8.48441e-38	77.1986
CA3	-1.29339	3.4486	-14.7299	7.59464e-39	8.50393e-38	77.1957
CXCR4	0.995965	5.79146	14.718	8.47856e-39	9.48335e-38	77.086
NEDD4L	-1.0143	5.2287	-14.7168	8.57086e-39	9.57615e-38	77.0752
SORL1	-0.928735	6.27437	-14.713	8.88136e-39	9.91768e-38	77.0398
RUNDC3A	0.683873	3.18901	14.7038	9.66615e-39	1.07706e-37	76.9554
LYPD3	0.747061	13.3203	14.703	9.73667e-39	1.08433e-37	76.9482
SORT1	0.598248	6.61635	14.6919	1.07963e-38	1.20103e-37	76.8452
FHL1	-1.49363	7.53172	-14.6788	1.21895e-38	1.35455e-37	76.7243
CCNE2	0.790454	5.08164	14.6633	1.40643e-38	1.56205e-37	76.5817
ICOS	1.64176	2.99978	14.6619	1.42491e-38	1.58172e-37	76.5687
PODXL	-0.687721	11.556	-14.6573	1.48781e-38	1.65065e-37	76.5257
MROH6	1.20305	8.99104	14.6536	1.53862e-38	1.7061e-37	76.4922
LRRC8B	0.816801	7.2236	14.6523	1.55844e-38	1.72714e-37	76.4795
ARHGEF28	-0.941599	6.42031	-14.6468	1.63964e-38	1.81518e-37	76.4288
FBXL19	0.924058	4.19036	14.6428	1.70184e-38	1.88302e-37	76.3917
MMP24OS	0.712605	8.22203	14.6408	1.73238e-38	1.91578e-37	76.374
FMO5	-0.988127	3.32656	-14.6402	1.74233e-38	1.92575e-37	76.3683
PI15	1.08824	4.48333	14.636	1.81128e-38	2.00088e-37	76.3296
DENND1A	0.811275	5.43966	14.6298	1.91819e-38	2.1167e-37	76.2725
TNNI2	-2.17145	3.77276	-14.6272	1.9652e-38	2.16742e-37	76.2484
SH3BP5	-0.816168	9.78089	-14.6262	1.9841e-38	2.18709e-37	76.2388
GBP6	1.18622	3.06077	14.6242	2.02006e-38	2.22553e-37	76.2209
SMARCA1	-0.618869	5.99268	-14.6162	2.17678e-38	2.39691e-37	76.1465
IPO4	0.59486	8.83176	14.6159	2.18146e-38	2.40077e-37	76.1443
DOCK9-DT	0.913521	3.95474	14.6075	2.35894e-38	2.59194e-37	76.0664
EN1	-1.04493	8.45111	-14.6062	2.38722e-38	2.62161e-37	76.0545
DAAM2	-1.14159	8.88494	-14.6053	2.40581e-38	2.64061e-37	76.0468
CABLES1	-0.634591	5.60656	-14.6046	2.42248e-38	2.65748e-37	76.0399
SORCS2	1.05809	5.9496	14.5999	2.53094e-38	2.7735e-37	75.9963
CNEP1R1	0.654111	11.0907	14.5977	2.5809e-38	2.82675e-37	75.9768
ACSF2	-1.19213	7.46072	-14.5952	2.64189e-38	2.89201e-37	75.9535
TYMS	0.91998	7.63672	14.5939	2.67441e-38	2.92604e-37	75.9413
TANK	0.629904	6.79126	14.5844	2.91936e-38	3.18894e-37	75.854
ANKRD36C	-1.41677	3.48524	-14.5817	2.9929e-38	3.26754e-37	75.8292
RGMB	-0.778765	6.16627	-14.5807	3.02112e-38	3.2966e-37	75.8199
CYP2J2	-1.74482	5.0749	-14.5794	3.05713e-38	3.33412e-37	75.8081
NFKB1	0.727479	9.12436	14.5722	3.26903e-38	3.55955e-37	75.7413
NPM3	0.982857	8.71592	14.5667	3.43792e-38	3.74147e-37	75.6911
PRRG4	0.890401	10.2967	14.5619	3.59456e-38	3.90987e-37	75.6467
RERGL	-2.00723	8.46601	-14.5568	3.7693e-38	4.09777e-37	75.5994
C5orf46	-1.91805	10.6363	-14.5519	3.94274e-38	4.28405e-37	75.5546
AURKB	0.72666	3.07084	14.5444	4.22531e-38	4.58866e-37	75.4856
FGF14-AS2	-0.81607	3.85816	-14.543	4.2804e-38	4.64603e-37	75.4727
SYNM	-1.34639	11.3606	-14.5318	4.74916e-38	5.1494e-37	75.3692
LRP10	0.681284	8.69737	14.5112	5.74157e-38	6.2156e-37	75.1801
LOC100506990	-0.71197	6.61924	-14.5053	6.06656e-38	6.5605e-37	75.1252
SH3BGRL2	-1.31219	9.29549	-14.5045	6.11066e-38	6.60196e-37	75.118
OR2A20P	-1.02086	6.18462	-14.503	6.194e-38	6.68074e-37	75.1045
PLEKHA6	-0.686035	2.67858	-14.5001	6.36125e-38	6.85034e-37	75.078
DCLRE1B	0.901115	5.94645	14.4973	6.52648e-38	7.02092e-37	75.0524
SMARCA2	-0.624382	7.63521	-14.496	6.60629e-38	7.10306e-37	75.0403
ASL	1.19771	7.85096	14.488	7.11381e-38	7.63675e-37	74.9666
PPAN	0.671887	4.92121	14.4877	7.13684e-38	7.65747e-37	74.9634
MAP6	-0.673002	2.75691	-14.4817	7.53903e-38	8.08479e-37	74.9087
POLB	1.02304	7.26577	14.4804	7.63184e-38	8.18004e-37	74.8965
FAM111B	0.877414	3.13561	14.4796	7.69068e-38	8.23881e-37	74.8889
EML6	1.28225	4.77997	14.4795	7.69783e-38	8.24217e-37	74.888
ITGAL	1.31118	5.40157	14.4789	7.73889e-38	8.28182e-37	74.8827
ABHD6	-0.677609	6.63944	-14.4758	7.96546e-38	8.51542e-37	74.8539
EIPR1	0.888249	6.75573	14.4754	7.99352e-38	8.54096e-37	74.8504
SMARCC2	-0.688717	8.53938	-14.4743	8.07015e-38	8.61836e-37	74.8409
GNAZ	-1.32484	6.45894	-14.4719	8.2529e-38	8.80438e-37	74.8186
C16orf91	0.861654	8.59064	14.4585	9.34017e-38	9.95396e-37	74.6953
C15orf62	1.09164	5.68556	14.4582	9.37027e-38	9.9757e-37	74.6921
PTGER3	0.666458	4.74293	14.4457	1.05081e-37	1.11755e-36	74.5779
NUP98	0.747169	6.34168	14.4415	1.09225e-37	1.16042e-36	74.5394
PLPP6	0.643858	10.0919	14.4201	1.33133e-37	1.41222e-36	74.3422
CFAP70	-0.860132	5.54834	-14.4184	1.35248e-37	1.43392e-36	74.3264
NHS	-0.752974	7.01755	-14.4168	1.3719e-37	1.45301e-36	74.3122
KRT15	-1.25496	12.7736	-14.4157	1.38625e-37	1.46745e-36	74.3019
PHF1	-0.74183	5.97946	-14.4116	1.43901e-37	1.52095e-36	74.2647
KLK7	1.04776	13.0096	14.4097	1.46471e-37	1.54652e-36	74.247
RDH12	1.45441	10.7201	14.4073	1.49807e-37	1.58094e-36	74.2246
COX7A1	-1.34342	8.87278	-14.4067	1.50589e-37	1.58838e-36	74.2194
GSTO1	0.625142	10.8887	14.4054	1.52458e-37	1.60726e-36	74.2071
CCDC146	-1.57958	7.3411	-14.4046	1.53525e-37	1.61768e-36	74.2002
SRPRB	0.881999	8.1654	14.4003	1.59748e-37	1.68239e-36	74.1606
BDKRB2	1.13909	9.34758	14.3999	1.6029e-37	1.68723e-36	74.1572
KCNK1	0.811812	6.65056	14.3971	1.64524e-37	1.73003e-36	74.1312
ZDHHC12	0.691457	6.11655	14.3956	1.66777e-37	1.75282e-36	74.1177
BCL2L12	0.663599	4.93784	14.3802	1.92275e-37	2.01668e-36	73.9759
ZNF25	-0.709379	7.77677	-14.3793	1.93834e-37	2.03199e-36	73.9679
CRIP2	-1.43564	5.29613	-14.3764	1.99168e-37	2.08685e-36	73.9408
ECRG4	-1.80459	8.70298	-14.3675	2.16188e-37	2.26287e-36	73.8591
IL2RG	1.79789	7.71124	14.3553	2.41872e-37	2.52785e-36	73.7473
DCTN5	0.641914	5.96142	14.3525	2.4811e-37	2.59172e-36	73.7219
IFT20	-0.594512	10.5931	-14.3483	2.5783e-37	2.69052e-36	73.6836
LYNX1	0.69341	5.834	14.3466	2.62105e-37	2.73374e-36	73.6673
ADRM1	0.881245	9.30985	14.3427	2.71459e-37	2.82732e-36	73.6323
NCBP2	0.721243	9.48449	14.3416	2.74223e-37	2.85289e-36	73.6222
ADH1B	-1.16513	6.59286	-14.3407	2.76585e-37	2.8731e-36	73.6137
SBSPON	-0.742047	4.38607	-14.3202	3.34037e-37	3.46289e-36	73.4257
DNAJC24	-0.665397	8.07051	-14.3151	3.50214e-37	3.62693e-36	73.3785
CADM3	-0.586496	3.98314	-14.3106	3.64888e-37	3.77511e-36	73.3377
SNX11	0.754702	8.07023	14.3068	3.77874e-37	3.90749e-36	73.3028
CMYA5	-1.26673	4.63409	-14.3034	3.89825e-37	4.02807e-36	73.2718
KIF21A	-0.829491	9.07837	-14.3034	3.89927e-37	4.02807e-36	73.2715
GNAI3	0.789439	10.8521	14.2994	4.04415e-37	4.17564e-36	73.2352
RIMS3	0.658681	5.50578	14.2939	4.25455e-37	4.39067e-36	73.1847
VPS37B	0.989936	5.95386	14.2907	4.38352e-37	4.51696e-36	73.1549
PDCD2L	1.15631	7.85394	14.2884	4.47566e-37	4.6096e-36	73.1342
CCDC149	-0.689522	4.07286	-14.2873	4.51942e-37	4.65233e-36	73.1245
AHNAK2	-1.24641	11.2822	-14.2853	4.60442e-37	4.73745e-36	73.1059
DDIT4L	-1.83034	4.29848	-14.2765	4.99228e-37	5.12882e-36	73.0254
KLHL7	0.891965	8.66743	14.2729	5.15987e-37	5.2957e-36	72.9925
LOC100507564	1.15359	7.73304	14.2672	5.4386e-37	5.5762e-36	72.9401
MMP28	-0.776467	6.01049	-14.2625	5.67991e-37	5.8178e-36	72.8968
TENM2	0.983427	10.0454	14.2588	5.87859e-37	6.0183e-36	72.8626
TRIM52	-0.620384	9.02077	-14.2562	6.01873e-37	6.15565e-36	72.8391
LHFPL6	-0.642971	11.9106	-14.2559	6.03222e-37	6.16637e-36	72.8369
FA2H	-1.0524	3.69827	-14.2553	6.06899e-37	6.20087e-36	72.8308
SLC29A1	-0.827481	6.37914	-14.2545	6.11079e-37	6.24048e-36	72.824
SRGAP2	-0.793103	7.85657	-14.2527	6.21491e-37	6.34365e-36	72.8071
LACTB	0.79082	6.38728	14.2496	6.39354e-37	6.51951e-36	72.7789
ANKRD13C	0.766557	7.61634	14.2461	6.60518e-37	6.73198e-36	72.7465
PKMYT1	0.729019	3.98989	14.2415	6.88721e-37	7.01247e-36	72.7048
ORMDL2	0.841223	10.7086	14.225	8.01273e-37	8.13829e-36	72.554
YPEL2	-0.707241	7.83813	-14.22	8.39004e-37	8.50889e-36	72.5082
MTERF2	-0.765371	9.77598	-14.2183	8.52606e-37	8.64258e-36	72.4922
NAV3	0.617589	5.13762	14.2149	8.79882e-37	8.91467e-36	72.4608
TCEAL9	0.620037	10.0789	14.2099	9.20499e-37	9.32158e-36	72.4158
CXCL16	0.689587	11.1679	14.2066	9.49529e-37	9.61082e-36	72.3849
SLC24A3	0.80527	9.85329	14.2061	9.53167e-37	9.6429e-36	72.3811
PLN	-1.90317	5.61591	-14.2052	9.61422e-37	9.72162e-36	72.3725
FCHSD2	-0.942605	8.35318	-14.2032	9.79077e-37	9.89528e-36	72.3544
FAAH2	1.2404	8.89635	14.1964	1.04248e-36	1.05309e-35	72.2919
SH3BGR	-1.38826	5.29426	-14.1948	1.05816e-36	1.0684e-35	72.277
LRRC37A2	-0.639974	7.38029	-14.1915	1.09061e-36	1.10063e-35	72.2469
CENPO	0.590366	7.22207	14.1913	1.09262e-36	1.10212e-35	72.2451
KIF15	1.28624	3.17975	14.1898	1.1071e-36	1.11617e-35	72.232
LGALS9	0.835411	6.2154	14.1858	1.14899e-36	1.15727e-35	72.195
SPOCK2	0.667198	4.66941	14.1795	1.21715e-36	1.22532e-35	72.1375
GPR65	1.52099	4.62712	14.1727	1.29555e-36	1.30361e-35	72.0754
TRIM35	-0.610187	9.76663	-14.171	1.31616e-36	1.3237e-35	72.0596
EMX2OS	-0.73746	5.83821	-14.1654	1.38531e-36	1.3912e-35	72.0086
PLD2	0.821834	7.87581	14.16	1.45621e-36	1.46169e-35	71.9589
TMEM139	-1.08455	3.15458	-14.1595	1.46286e-36	1.46622e-35	71.9544
CARD16	0.664736	6.79475	14.1577	1.48719e-36	1.48987e-35	71.9379
SEC61A1	1.00213	8.43936	14.1559	1.511e-36	1.51225e-35	71.9221
AKAP11	-0.640553	7.83124	-14.1545	1.53106e-36	1.53159e-35	71.909
DACT1	-1.63854	5.80028	-14.1533	1.54751e-36	1.54729e-35	71.8983
CCDC121	-0.70655	4.80622	-14.1469	1.64111e-36	1.63927e-35	71.8398
H19	-2.00821	8.83906	-14.1453	1.66624e-36	1.66357e-35	71.8247
ZNF35	1.28896	7.07668	14.1395	1.75737e-36	1.75285e-35	71.7716
RAB11B-AS1	0.847552	5.3929	14.1369	1.79866e-36	1.79229e-35	71.7485
ELL2	0.764676	7.26134	14.1367	1.80316e-36	1.7959e-35	71.746
DHRS1	0.61309	11.1048	14.1358	1.818e-36	1.80981e-35	71.7379
PLGRKT	0.956588	8.81044	14.1312	1.89616e-36	1.88671e-35	71.6959
CDC6	0.827958	2.79568	14.1303	1.91183e-36	1.90138e-35	71.6877
GSDMC	1.00094	10.387	14.1236	2.03349e-36	2.02139e-35	71.6263
CSRP1	-0.8266	11.4907	-14.1178	2.14346e-36	2.12761e-35	71.5738
FIBIN	-1.0079	5.89862	-14.1136	2.22685e-36	2.20826e-35	71.5358
THRSP	-3.74091	6.38947	-14.1058	2.3923e-36	2.37004e-35	71.4644
BOK	1.40976	6.94554	14.1031	2.45239e-36	2.42839e-35	71.4397
GPATCH8	-0.615026	10.1982	-14.0964	2.60788e-36	2.57988e-35	71.3785
RLIM	0.798085	8.73803	14.0944	2.65659e-36	2.62554e-35	71.36
SRGAP2C	-1.24214	7.44307	-14.0926	2.70118e-36	2.66704e-35	71.3434
UQCR10	0.671733	8.01328	14.092	2.71507e-36	2.67947e-35	71.3383
FOXO1	-0.69136	6.10067	-14.0911	2.73755e-36	2.70036e-35	71.3301
CNRIP1	-0.961377	10.6462	-14.0868	2.84762e-36	2.80624e-35	71.2908
ST8SIA4	0.638783	3.5581	14.0807	3.01173e-36	2.96654e-35	71.235
SGPP2	1.22518	7.78764	14.0753	3.16392e-36	3.11197e-35	71.1859
ZFP14	-0.900967	3.6803	-14.0705	3.30701e-36	3.24804e-35	71.1419
CACNB4	0.996291	3.27024	14.0625	3.55948e-36	3.49267e-35	71.0686
PAFAH1B3	0.918951	8.31715	14.0609	3.60911e-36	3.53968e-35	71.0548
NUP155	0.847731	8.31586	14.0586	3.68688e-36	3.61424e-35	71.0336
KRBA1	1.05874	3.74927	14.0524	3.90319e-36	3.82081e-35	70.9768
APOBEC3A	2.59635	3.81026	14.0449	4.18002e-36	4.08791e-35	70.9085
TIMM10	0.757203	9.66807	14.0423	4.28082e-36	4.18052e-35	70.8848
CDR2	-0.634977	7.33834	-14.0355	4.55592e-36	4.44706e-35	70.8227
RALY-AS1	0.635655	2.90702	14.0325	4.68125e-36	4.56722e-35	70.7957
IRF8	1.20402	9.50383	14.0317	4.71537e-36	4.59832e-35	70.7885
ALG3	0.727748	9.12078	14.0295	4.81364e-36	4.69193e-35	70.7679
PDCD11	0.681855	6.98127	14.0278	4.89021e-36	4.7643e-35	70.7522
ZNF785	-1.06931	4.93506	-14.0267	4.93671e-36	4.80733e-35	70.7428
MAPK3	0.694015	9.10124	14.0212	5.19122e-36	5.05278e-35	70.6927
AP5S1	0.886206	4.56275	14.0188	5.30614e-36	5.15486e-35	70.6709
SNRPB	0.607942	9.75836	14.0174	5.3754e-36	5.21721e-35	70.658
EZH2	0.606515	11.0716	14.0159	5.44895e-36	5.2861e-35	70.6444
CLNS1A	-0.756643	8.88036	-14.012	5.64714e-36	5.4732e-35	70.6089
PARVA	-0.657319	7.98053	-14.0112	5.68963e-36	5.51178e-35	70.6014
SELL	1.77474	4.86383	14.0071	5.9068e-36	5.71408e-35	70.5641
MBNL2	-0.627436	6.32838	-14.0059	5.97141e-36	5.77115e-35	70.5532
PLAAT3	-1.36198	4.1914	-14.0053	6.00419e-36	5.79737e-35	70.5478
NUTM2B-AS1	-0.763101	6.02283	-14.0006	6.27131e-36	6.04961e-35	70.5044
LOC101927972	2.11598	6.51646	13.9992	6.34714e-36	6.11989e-35	70.4925
HSPA2	-0.846371	9.91983	-13.9948	6.61237e-36	6.37262e-35	70.4517
APEH	0.611467	6.13323	13.9884	7.0096e-36	6.74912e-35	70.3936
CYP39A1	-1.2032	7.25498	-13.9875	7.06607e-36	6.8003e-35	70.3856
C7	-1.04795	5.66751	-13.9703	8.2664e-36	7.94061e-35	70.2293
EPDR1	-1.92601	6.23938	-13.97	8.29285e-36	7.96229e-35	70.2261
FERMT2	-0.997688	6.22626	-13.9693	8.34626e-36	8.00984e-35	70.2197
PTPRF	-0.585133	9.39238	-13.9651	8.67014e-36	8.31678e-35	70.1818
SLITRK4	-1.37509	4.24097	-13.9645	8.72036e-36	8.36105e-35	70.1761
PTPN22	0.664837	2.81975	13.9628	8.85846e-36	8.48553e-35	70.1604
PTPN14	-0.92408	6.94603	-13.9626	8.87098e-36	8.49357e-35	70.159
TRAF3IP3	0.841883	4.58695	13.9601	9.07519e-36	8.68101e-35	70.1363
PRMT6	1.34469	6.80651	13.9582	9.23432e-36	8.82911e-35	70.119
SLC35F1	-1.29561	6.33656	-13.9564	9.38947e-36	8.9691e-35	70.1024
MANF	0.675382	11.353	13.9541	9.59031e-36	9.1567e-35	70.0813
BAK1	0.811696	4.71812	13.952	9.77801e-36	9.33157e-35	70.062
SH3BP5L	0.630283	9.79689	13.9513	9.84102e-36	9.38735e-35	70.0556
MCOLN3	-0.864774	6.10846	-13.9474	1.01912e-35	9.71236e-35	70.0208
KCNRG	1.39041	4.60394	13.9404	1.08697e-35	1.03494e-34	69.9566
EEF1E1	0.741263	9.13404	13.9357	1.13432e-35	1.07952e-34	69.9141
TSPYL2	-0.756742	8.6836	-13.9265	1.23411e-35	1.1734e-34	69.8302
AGAP11	-1.09597	7.93028	-13.9244	1.25715e-35	1.19476e-34	69.8117
EPS8	-0.708885	10.7346	-13.9217	1.28878e-35	1.22425e-34	69.787
ITK	1.65118	5.33086	13.9173	1.34156e-35	1.2738e-34	69.747
INMT	-1.38043	6.55865	-13.915	1.3706e-35	1.30017e-34	69.7257
PARD3	-0.619112	8.09784	-13.9134	1.39057e-35	1.3185e-34	69.7113
UBL4A	0.692088	8.33892	13.9083	1.45716e-35	1.381e-34	69.6647
EPHX1	-1.05851	10.1519	-13.8792	1.89895e-35	1.79475e-34	69.4009
LINC00312	-0.910886	3.5358	-13.879	1.90308e-35	1.79782e-34	69.3988
PALM	-0.900923	6.77375	-13.867	2.12404e-35	2.0038e-34	69.2894
OR7E37P	0.670963	9.57437	13.8666	2.13138e-35	2.0098e-34	69.2859
ZNF419	-1.14604	7.31292	-13.8629	2.20357e-35	2.07596e-34	69.2528
CD34	-1.40818	9.61812	-13.8608	2.24686e-35	2.11578e-34	69.2334
IGSF22	0.983998	7.68255	13.8604	2.25549e-35	2.12293e-34	69.2296
LOXL4	-0.745856	4.13285	-13.8591	2.2829e-35	2.14774e-34	69.2175
PEG3	-0.776287	5.30423	-13.8555	2.35797e-35	2.21736e-34	69.1853
RBM4B	-0.609538	9.19212	-13.8443	2.61275e-35	2.45357e-34	69.0831
RRN3P3	-1.12237	7.40199	-13.8426	2.65163e-35	2.48894e-34	69.0684
RELN	-1.1473	8.26439	-13.8419	2.66937e-35	2.50445e-34	69.0618
MASTL	0.902138	9.34546	13.8411	2.68804e-35	2.52011e-34	69.0548
ZBTB44	-0.735521	7.96849	-13.8366	2.801e-35	2.62435e-34	69.0138
RAB30	-0.639213	5.61672	-13.8343	2.86106e-35	2.67941e-34	68.9927
NANOG	-0.629396	5.74558	-13.8259	3.0889e-35	2.88956e-34	68.9164
KRT18	-2.82535	6.82374	-13.8223	3.19066e-35	2.98264e-34	68.8841
RNF180	-0.68122	3.94198	-13.8222	3.19376e-35	2.98418e-34	68.8831
CSRNP1	0.713219	5.95685	13.8179	3.32064e-35	3.10133e-34	68.8443
HOTS	-2.0736	9.62467	-13.809	3.60255e-35	3.35851e-34	68.7632
MTRR	0.67124	8.38335	13.8049	3.73852e-35	3.47896e-34	68.7263
ZNF43	-0.991905	8.28633	-13.799	3.94699e-35	3.66963e-34	68.6722
TFAP2B	-1.16062	5.89385	-13.7974	4.00466e-35	3.72156e-34	68.6578
SASH3	1.5053	4.4351	13.7917	4.21638e-35	3.91301e-34	68.6065
TLCD4	-2.58371	5.36003	-13.7737	4.96642e-35	4.5987e-34	68.4434
C9orf40	0.888208	4.64439	13.7724	5.0286e-35	4.65208e-34	68.431
PPP1R3E	-0.765959	8.0376	-13.768	5.23378e-35	4.83754e-34	68.3912
PAK1IP1	0.656843	10.1724	13.7665	5.30554e-35	4.89957e-34	68.3776
MCM6	0.82773	8.47585	13.763	5.47331e-35	5.05211e-34	68.3466
KIFC1	1.05409	4.84097	13.7551	5.88222e-35	5.42468e-34	68.2749
MINPP1	1.24695	9.29697	13.7488	6.23233e-35	5.73983e-34	68.2173
LRATD1	0.590813	8.33499	13.7484	6.25427e-35	5.75746e-34	68.2138
NABP2	0.659614	4.61531	13.7454	6.425e-35	5.90933e-34	68.187
TOP1	0.599942	11.0349	13.7446	6.4746e-35	5.95229e-34	68.1793
ADAMTSL3	-0.614334	2.51578	-13.7415	6.6588e-35	6.11889e-34	68.1514
SCCPDH	-0.841538	9.03102	-13.7399	6.75382e-35	6.20343e-34	68.1373
NEXN	-1.33331	7.41394	-13.7343	7.11015e-35	6.52197e-34	68.0861
RBL2	-0.779884	9.81344	-13.7324	7.23039e-35	6.62635e-34	68.0694
CARMIL3	1.05046	7.03828	13.7323	7.2361e-35	6.62863e-34	68.0686
LEO1	0.955638	9.36782	13.73	7.39426e-35	6.77049e-34	68.0471
DYNLRB2	-1.2736	3.61415	-13.7285	7.4939e-35	6.85562e-34	68.0337
NUDT11	-1.17105	6.66215	-13.7224	7.92047e-35	7.23619e-34	67.9786
RETSAT	-0.618309	10.7448	-13.7159	8.40217e-35	7.67286e-34	67.9198
EBNA1BP2	0.603555	11.2747	13.7125	8.66959e-35	7.91003e-34	67.8886
VRK1	0.662713	8.82854	13.7057	9.21713e-35	8.39842e-34	67.8276
CNGA1	-0.99437	2.85783	-13.7057	9.22257e-35	8.39965e-34	67.827
HERC5	1.49175	6.18731	13.7037	9.39003e-35	8.53703e-34	67.8091
RBM5	-0.720989	9.21482	-13.6948	1.01797e-34	9.23451e-34	67.7287
CYP1B1	-1.25992	6.81013	-13.6941	1.02424e-34	9.2873e-34	67.7226
PRR15L	-1.82203	3.77597	-13.6909	1.05477e-34	9.5599e-34	67.6933
GSDME	2.09791	7.51501	13.6884	1.07844e-34	9.76589e-34	67.6712
APOC1	-1.4424	5.52561	-13.6797	1.16724e-34	1.0556e-33	67.5924
DLG2	-1.56398	6.85974	-13.6715	1.25764e-34	1.13635e-33	67.5181
MCAT	0.81261	4.93509	13.6675	1.30373e-34	1.17697e-33	67.4823
MMS19	-0.689836	9.04094	-13.6669	1.31127e-34	1.18325e-33	67.4765
STAM2	0.621137	7.27097	13.657	1.43414e-34	1.29356e-33	67.3873
ALG14	0.959609	7.75044	13.6526	1.49264e-34	1.34573e-33	67.3475
ZNF91	-0.800336	4.12431	-13.6514	1.51001e-34	1.3608e-33	67.336
CEP76	0.996736	8.17158	13.6461	1.5844e-34	1.42721e-33	67.2881
RPA3	0.612632	9.78062	13.6455	1.59312e-34	1.43443e-33	67.2827
SMCO4	1.37109	5.41798	13.6256	1.90722e-34	1.71575e-33	67.1035
LOC202181	-0.83166	5.14236	-13.6222	1.96689e-34	1.76865e-33	67.0728
POGK	-0.77746	7.49358	-13.615	2.09999e-34	1.88662e-33	67.0076
ITPRIP	0.667316	7.22204	13.615	2.10083e-34	1.88662e-33	67.0072
CDV3	0.595463	8.71056	13.6112	2.17366e-34	1.95117e-33	66.9732
TMEM154	0.802741	12.0163	13.6037	2.32707e-34	2.08796e-33	66.9053
ATP1B2	-1.13256	3.71635	-13.599	2.42755e-34	2.17526e-33	66.8632
LY6D	0.737368	13.5346	13.5858	2.73593e-34	2.45053e-33	66.7441
IL36A	2.24413	3.35357	13.5814	2.84816e-34	2.54661e-33	66.7041
CYTIP	1.38427	6.9748	13.5617	3.40543e-34	3.03696e-33	66.5262
TACC3	0.839387	5.18445	13.5599	3.45888e-34	3.08328e-33	66.5107
FCGR3B	2.34274	6.08302	13.5597	3.46617e-34	3.08844e-33	66.5086
CD99	-0.736922	12.4517	-13.5547	3.62709e-34	3.22902e-33	66.4634
C1QTNF7	-1.54765	4.4534	-13.553	3.68381e-34	3.27668e-33	66.4479
EID3	0.856097	5.59564	13.5464	3.91084e-34	3.47711e-33	66.3884
CDC42EP5	1.75106	8.2874	13.5415	4.08652e-34	3.63174e-33	66.3446
LDB2	-0.630323	8.66564	-13.5398	4.14994e-34	3.68332e-33	66.3293
ZNF83	-0.825225	10.0968	-13.5396	4.15666e-34	3.68769e-33	66.3277
ABLIM3	-1.26163	6.81456	-13.5296	4.55211e-34	4.03329e-33	66.2372
BPIFC	0.684865	12.2103	13.5255	4.72524e-34	4.18309e-33	66.2
ZPR1	0.689099	9.4526	13.5245	4.76903e-34	4.22004e-33	66.1908
TRIM16	1.13794	11.0194	13.5215	4.90012e-34	4.32858e-33	66.1638
ZNF189	-0.802017	8.65812	-13.5152	5.18405e-34	4.57742e-33	66.1077
MYOCD	-1.10147	3.78131	-13.5147	5.20705e-34	4.59576e-33	66.1033
ABCD3	1.07151	9.08228	13.5134	5.27206e-34	4.65114e-33	66.091
LAP3	0.705994	11.7702	13.5033	5.77279e-34	5.08416e-33	66.0006
NIPA2	0.648902	9.51634	13.4991	5.99722e-34	5.27503e-33	65.9626
SHCBP1	1.57593	5.64946	13.4982	6.04821e-34	5.31533e-33	65.9542
ECI2	-0.808585	9.13168	-13.4955	6.19639e-34	5.44091e-33	65.9301
NR1H3	-1.23451	7.81737	-13.4922	6.38452e-34	5.6037e-33	65.9003
PWAR6	-0.995883	4.40465	-13.4858	6.76486e-34	5.93246e-33	65.8427
WFDC5	0.777273	12.6267	13.4843	6.85989e-34	6.01324e-33	65.8288
KCNJ2	1.05709	10.3796	13.4811	7.05953e-34	6.18296e-33	65.8003
CCL8	1.85711	7.66685	13.4801	7.12144e-34	6.23187e-33	65.7916
ING2	0.901055	7.16794	13.4762	7.37917e-34	6.45465e-33	65.7562
CARMN	-1.82308	6.24962	-13.4747	7.48225e-34	6.54204e-33	65.7424
PNKP	1.22199	7.55611	13.4723	7.64136e-34	6.67547e-33	65.7214
MPPED2	-0.708986	2.83055	-13.4672	8.00585e-34	6.99091e-33	65.675
S100P	1.76039	10.5925	13.462	8.38962e-34	7.31981e-33	65.6284
ZNF521	-0.876203	9.71507	-13.4593	8.59436e-34	7.4889e-33	65.6044
SIRPG	0.705368	3.00876	13.4534	9.06269e-34	7.8903e-33	65.5515
GPRASP1	-1.49638	7.48943	-13.4453	9.75542e-34	8.48982e-33	65.4782
SLC25A39	0.889264	8.1399	13.4441	9.86069e-34	8.57779e-33	65.4675
RHPN2	-1.74513	9.12828	-13.4412	1.01214e-33	8.80088e-33	65.4415
ZNF137P	-1.1811	6.07233	-13.429	1.13064e-33	9.82293e-33	65.3313
ZNF540	-0.903874	3.89623	-13.4046	1.40799e-33	1.21913e-32	65.1129
GGCT	0.803737	8.80196	13.4015	1.44903e-33	1.25413e-32	65.0843
C6orf62	0.825265	10.4431	13.3945	1.54235e-33	1.33154e-32	65.0221
POLE4	0.745743	5.80078	13.3944	1.545e-33	1.33326e-32	65.0204
FOXP1-IT1	-0.73401	7.64797	-13.376	1.82244e-33	1.56874e-32	64.856
LCP2	0.608741	3.86354	13.3754	1.83367e-33	1.57774e-32	64.8499
OSR2	-1.39011	9.1084	-13.3745	1.84833e-33	1.58969e-32	64.8419
VSIG10L2	-2.53125	5.55039	-13.3717	1.89435e-33	1.62791e-32	64.8174
NPTN-IT1	-1.08569	9.37617	-13.3666	1.98404e-33	1.70427e-32	64.7714
USP54	-0.703137	9.82431	-13.3617	2.07349e-33	1.77962e-32	64.7275
NAPRT	0.780933	8.68964	13.3543	2.21671e-33	1.90095e-32	64.661
AGAP9	-1.31586	4.80348	-13.3515	2.27415e-33	1.9494e-32	64.6355
MYOM2	-1.3457	5.63666	-13.3475	2.35625e-33	2.01808e-32	64.6002
NWD2	1.48294	3.04305	13.3463	2.3828e-33	2.03998e-32	64.589
ZNF768	-0.880314	7.68416	-13.3453	2.40515e-33	2.05825e-32	64.5797
HCAR3	1.75553	9.82791	13.3399	2.52481e-33	2.15795e-32	64.5314
SPARCL1	-0.650478	12.7111	-13.3363	2.60746e-33	2.22675e-32	64.4993
PCDHGA4	-0.84319	3.34465	-13.3353	2.63049e-33	2.24455e-32	64.4906
CLMP	-1.38168	7.35439	-13.3337	2.66832e-33	2.27588e-32	64.4764
PSD3	-1.043	7.38535	-13.3327	2.69273e-33	2.29574e-32	64.4673
GSTM5	-1.72587	5.873	-13.3316	2.71906e-33	2.31627e-32	64.4576
NOP2	1.23063	9.82905	13.3238	2.91756e-33	2.48331e-32	64.3875
SGO2	1.00654	5.27473	13.3155	3.14526e-33	2.6749e-32	64.3126
MYL9	-0.790766	6.52954	-13.314	3.18561e-33	2.7081e-32	64.3
LRIG3	-0.695106	9.15747	-13.3069	3.39699e-33	2.8854e-32	64.236
CAVIN2	-0.623518	5.57356	-13.3054	3.44387e-33	2.92402e-32	64.2223
PLAUR	1.1457	4.49276	13.3043	3.47778e-33	2.95159e-32	64.2126
CCR5	0.834558	3.12693	13.3004	3.6012e-33	3.05381e-32	64.1779
LYRM4-AS1	1.11233	4.16194	13.2989	3.65073e-33	3.09454e-32	64.1643
TRMT6	0.794892	8.33662	13.2979	3.68279e-33	3.11914e-32	64.1556
ENDOU	0.871131	11.1274	13.2965	3.73233e-33	3.15979e-32	64.1423
SLC18A2	-0.75447	5.37522	-13.2954	3.76826e-33	3.1889e-32	64.1327
CYP27B1	1.99072	3.83039	13.2951	3.77856e-33	3.1963e-32	64.13
SLC25A21-AS1	-0.82476	3.58418	-13.2922	3.87936e-33	3.28022e-32	64.1038
GRHL1	1.1783	10.4076	13.2885	4.00923e-33	3.38585e-32	64.071
LMCD1	-0.91717	6.16416	-13.2862	4.09173e-33	3.45268e-32	64.0507
ADAM8	0.787694	4.47755	13.2775	4.42585e-33	3.73155e-32	63.9726
CTNS	0.830931	5.6972	13.2727	4.62208e-33	3.89246e-32	63.9294
RTN4RL1	-0.611502	2.72257	-13.2664	4.88979e-33	4.11596e-32	63.8733
PHF23	0.609335	5.18376	13.2636	5.01487e-33	4.21778e-32	63.8482
NAPA	0.624579	9.83291	13.2627	5.05764e-33	4.25202e-32	63.8397
WDHD1	0.642553	5.38297	13.2611	5.12915e-33	4.30861e-32	63.8258
KLRG2	-0.751291	3.47688	-13.2582	5.26361e-33	4.41951e-32	63.8
MRAP2	1.5555	6.05939	13.2574	5.30201e-33	4.44837e-32	63.7928
VEZF1	-0.705379	9.42908	-13.2541	5.46235e-33	4.57915e-32	63.7631
AP1M2	0.857489	5.40203	13.2503	5.65451e-33	4.73831e-32	63.7287
PPP2R2B	-0.600474	4.21627	-13.2477	5.78505e-33	4.84572e-32	63.706
NUAK1	-0.775566	11.1693	-13.2466	5.84349e-33	4.89267e-32	63.696
TMEM185A	0.923657	6.38283	13.2435	6.01117e-33	5.03102e-32	63.6678
TRBC1	1.76568	8.55739	13.2424	6.07032e-33	5.07845e-32	63.658
C12orf54	0.595436	3.51158	13.2384	6.29058e-33	5.26059e-32	63.6226
PIK3C2G	-1.4589	7.95132	-13.2266	6.99077e-33	5.84137e-32	63.5175
ZNF284	-0.764856	9.52566	-13.2257	7.0513e-33	5.88955e-32	63.5089
KCNMB4	-0.843099	3.61273	-13.2239	7.16598e-33	5.98048e-32	63.4928
STARD9	-1.0151	8.76263	-13.2181	7.54631e-33	6.28513e-32	63.4414
TCF7L1	-1.41735	7.68908	-13.2105	8.08438e-33	6.7281e-32	63.3728
CCNO	1.55535	5.9572	13.2102	8.10513e-33	6.74236e-32	63.3702
MYH11	-0.88584	6.56673	-13.2083	8.24537e-33	6.85069e-32	63.3532
NFIX	-0.713652	6.86329	-13.1957	9.22607e-33	7.65313e-32	63.2413
EPB41L4A-DT	1.0398	3.33922	13.194	9.37596e-33	7.77432e-32	63.2252
ANKRD10-IT1	-0.585875	6.41064	-13.1841	1.02461e-32	8.48555e-32	63.1369
SGCE	-1.14957	9.04146	-13.184	1.02512e-32	8.48637e-32	63.1364
PAQR4	0.941946	7.02236	13.1809	1.05433e-32	8.72466e-32	63.1084
HYOU1	0.894289	8.84567	13.1797	1.0658e-32	8.81602e-32	63.0977
MTHFD2	0.621179	8.90191	13.1788	1.07394e-32	8.87977e-32	63.0901
NEGR1	-1.00566	5.29843	-13.1757	1.1046e-32	9.12593e-32	63.0621
LOC101927699	-1.07642	6.00606	-13.1746	1.1155e-32	9.21226e-32	63.0523
PSG7	1.94837	4.64471	13.1656	1.20864e-32	9.97347e-32	62.9725
THYN1	-0.702154	9.59422	-13.1544	1.33689e-32	1.1014e-31	62.8721
TIMM8B	0.866613	9.52614	13.1493	1.39927e-32	1.15141e-31	62.8267
PRR11	0.646632	9.73791	13.1459	1.44331e-32	1.1867e-31	62.7958
CCL14	-0.674894	6.68944	-13.1433	1.47682e-32	1.21377e-31	62.773
LMOD1	-1.72271	5.07718	-13.1364	1.57094e-32	1.29061e-31	62.7115
STRIP2	0.700782	2.88726	13.1348	1.59338e-32	1.308e-31	62.6973
CES1	-2.12008	8.48225	-13.1347	1.59579e-32	1.30945e-31	62.6958
ASMTL	-0.83057	7.91707	-13.1318	1.63668e-32	1.34194e-31	62.6707
CD63	-0.620419	13.0801	-13.1314	1.64242e-32	1.34557e-31	62.6672
MMP1	2.89765	3.93912	13.1294	1.67321e-32	1.37024e-31	62.6487
IRAK3	0.613927	5.57734	13.1249	1.74126e-32	1.42484e-31	62.609
DNMT3B	0.750439	6.52072	13.1165	1.87759e-32	1.53517e-31	62.534
TCAF1	-0.758154	6.14435	-13.1156	1.89304e-32	1.54719e-31	62.5258
ARL5A	0.875057	10.3327	13.1103	1.98527e-32	1.62063e-31	62.4785
FAM221A	-0.638102	4.6875	-13.1088	2.01083e-32	1.64085e-31	62.4657
ALDH3A2	-0.923544	10.7872	-13.1022	2.13341e-32	1.74018e-31	62.4068
ENO2	-1.263	6.70969	-13.0979	2.21738e-32	1.80689e-31	62.3684
PTN	-1.15043	6.29364	-13.0979	2.21784e-32	1.80689e-31	62.3682
CYB5R3	-0.965607	9.73598	-13.0953	2.2707e-32	1.84923e-31	62.3447
BIRC3	0.918007	4.77455	13.0943	2.2907e-32	1.86478e-31	62.336
PRIMA1	-1.29456	8.56856	-13.0939	2.29856e-32	1.8697e-31	62.3326
ASPN	-1.05122	7.38169	-13.0929	2.31922e-32	1.88575e-31	62.3237
ABCA11P	-1.06684	4.79532	-13.0873	2.43792e-32	1.98148e-31	62.274
FKBP11	0.858784	8.71229	13.0856	2.4756e-32	2.01132e-31	62.2587
SLC22A15	-1.24956	6.13409	-13.0851	2.48684e-32	2.01964e-31	62.2542
PKP1	1.43963	10.4266	13.0802	2.59837e-32	2.10856e-31	62.2105
BEND3	1.30416	7.10608	13.072	2.7956e-32	2.26682e-31	62.1377
GPD1	-0.810961	3.11168	-13.0698	2.85063e-32	2.30962e-31	62.1183
CCDC167	0.93797	5.61755	13.0693	2.86566e-32	2.32088e-31	62.1131
MFSD2B	0.596935	2.75206	13.0609	3.08734e-32	2.49943e-31	62.0389
SDR16C5	0.787854	12.7545	13.0581	3.16745e-32	2.56328e-31	62.0134
ZNF667-AS1	-1.19994	8.33518	-13.0534	3.3026e-32	2.66949e-31	61.9718
IL22RA1	0.84441	9.69598	13.0525	3.33055e-32	2.69103e-31	61.9634
BLOC1S4	0.740063	5.43216	13.0517	3.35428e-32	2.70913e-31	61.9564
FAM149A	-1.06445	3.65699	-13.0516	3.35687e-32	2.71016e-31	61.9556
FAM217B	0.782784	9.36985	13.0494	3.42361e-32	2.76296e-31	61.936
ST7L	-0.782901	6.39151	-13.0459	3.53124e-32	2.8487e-31	61.9052
DDX41	0.741452	10.4902	13.0434	3.61149e-32	2.91115e-31	61.8828
SPTY2D1	0.687673	8.51707	13.0422	3.65154e-32	2.94228e-31	61.8718
ZNF37BP	-0.680336	5.0084	-13.0396	3.73452e-32	3.00561e-31	61.8495
APELA	2.36387	6.80153	13.0333	3.95172e-32	3.17544e-31	61.7932
ANO10	0.78392	8.94215	13.0319	4.00138e-32	3.21409e-31	61.7808
LINC00515	-0.762399	5.28289	-13.0312	4.02799e-32	3.2342e-31	61.7742
ME1	0.845301	7.78076	13.0266	4.19737e-32	3.36625e-31	61.7332
CENPK	0.995836	5.25632	13.0144	4.68015e-32	3.74759e-31	61.6248
KIF18A	0.757452	3.13582	13.014	4.69731e-32	3.75986e-31	61.6212
CEP19	0.635774	4.19225	13.0116	4.79924e-32	3.83995e-31	61.5998
STARD5	0.671732	11.1194	13.0108	4.83191e-32	3.86459e-31	61.593
BATF3	1.29012	4.52994	13.0083	4.94073e-32	3.95008e-31	61.5709
ARHGAP9	0.980964	6.05719	13.0051	5.08305e-32	4.05913e-31	61.5426
ZNF850	-1.06038	3.91128	-13.0037	5.14732e-32	4.10885e-31	61.5301
HARBI1	0.855784	2.97591	12.9978	5.42921e-32	4.32883e-31	61.477
APBA1	-0.610521	3.11614	-12.9963	5.4982e-32	4.38214e-31	61.4645
MAMDC2	-1.29589	10.1279	-12.9801	6.35481e-32	5.05702e-31	61.3204
FXYD1	-1.4208	8.15084	-12.9767	6.55065e-32	5.20682e-31	61.2901
COL28A1	-0.842106	4.96998	-12.9762	6.5792e-32	5.22749e-31	61.2858
ARHGAP11A	0.827521	3.19971	12.9709	6.89826e-32	5.47465e-31	61.2387
GKAP1	-0.671673	3.90396	-12.9687	7.03568e-32	5.58155e-31	61.219
C9orf16	0.685176	5.9266	12.9642	7.32286e-32	5.80489e-31	61.1792
RAPGEF3	-0.626015	5.15723	-12.9584	7.7118e-32	6.1085e-31	61.1277
SCUBE3	-0.588347	2.93807	-12.9518	8.17955e-32	6.47152e-31	61.0691
TRPM6	0.908935	3.44026	12.9507	8.26554e-32	6.53703e-31	61.0587
SELENOP	-0.700679	9.4127	-12.9489	8.39824e-32	6.63942e-31	61.0428
SOST	2.72499	3.82526	12.9456	8.64511e-32	6.82934e-31	61.014
PDXK	0.63743	6.34351	12.9347	9.53212e-32	7.52426e-31	60.9168
RANGAP1	1.02856	6.13959	12.9299	9.94632e-32	7.84819e-31	60.8745
NDNF	-1.02069	3.00623	-12.9292	1.00086e-31	7.8943e-31	60.8682
SLC26A4	1.8265	3.97246	12.9196	1.08994e-31	8.58944e-31	60.7834
IL12B	1.89427	3.38879	12.9159	1.12643e-31	8.86772e-31	60.7506
LILRB2	1.4542	5.25419	12.9117	1.16951e-31	9.19984e-31	60.7132
MID1IP1	1.0066	9.589	12.9062	1.22809e-31	9.65322e-31	60.6646
ATP6V0D1	0.832417	10.6025	12.8968	1.33571e-31	1.04912e-30	60.581
SAR1B	0.778745	7.7246	12.896	1.34516e-31	1.05613e-30	60.574
ANLN	1.08692	7.10751	12.8867	1.46165e-31	1.1454e-30	60.4913
MED21	0.729017	8.79187	12.8816	1.52905e-31	1.19685e-30	60.4465
SPRR2G	1.60096	14.0277	12.8774	1.58669e-31	1.24102e-30	60.4096
NIBAN3	0.655484	3.26169	12.877	1.59297e-31	1.24546e-30	60.4057
DNAL1	-1.07788	4.26585	-12.8769	1.59486e-31	1.24647e-30	60.4045
MRTFB	-0.841717	6.01134	-12.8756	1.61228e-31	1.2596e-30	60.3937
IER5	0.817981	7.85384	12.875	1.62091e-31	1.26586e-30	60.3884
ZNF136	-0.78271	5.63403	-12.875	1.62188e-31	1.26614e-30	60.3878
ZDHHC2	-0.773383	4.73557	-12.8725	1.65828e-31	1.29406e-30	60.3657
MIR22HG	0.791139	10.8647	12.8674	1.735e-31	1.35188e-30	60.3207
MMP9	1.59524	4.89346	12.8657	1.76166e-31	1.37213e-30	60.3055
MIS18A	0.641356	8.74451	12.8584	1.87919e-31	1.46312e-30	60.2412
ZNF862	-0.98299	8.14712	-12.8512	2.00457e-31	1.55956e-30	60.177
MYO5C	-0.953994	10.3675	-12.8484	2.05391e-31	1.59734e-30	60.1528
HEATR5A	0.59663	9.7109	12.8466	2.08703e-31	1.62248e-30	60.1368
PDLIM4	-0.652214	6.17272	-12.8228	2.57901e-31	2.00041e-30	59.9262
SCEL	-0.678066	9.44938	-12.8218	2.60191e-31	2.01741e-30	59.9174
PAM	-0.637789	10.9719	-12.8166	2.72603e-31	2.11126e-30	59.871
CDO1	-0.860918	3.94648	-12.8153	2.75731e-31	2.13468e-30	59.8597
KIAA1324L	-0.814078	3.9521	-12.8101	2.88815e-31	2.23261e-30	59.8135
FAM153A	-0.997737	4.53595	-12.8064	2.98336e-31	2.30361e-30	59.7812
RAD54L	0.664205	4.13737	12.8027	3.08304e-31	2.37879e-30	59.7485
DNAJB4	-0.66265	6.1466	-12.8013	3.12137e-31	2.40746e-30	59.7362
CAMK1	-1.07763	3.62711	-12.8013	3.12296e-31	2.40778e-30	59.7357
EME2	0.762911	9.04458	12.7991	3.18298e-31	2.45314e-30	59.7168
MARS	0.638838	10.6892	12.7891	3.48012e-31	2.68013e-30	59.628
LINC00963	-0.680088	5.97644	-12.7754	3.92763e-31	3.01912e-30	59.5076
DDAH2	-0.79517	8.44777	-12.7728	4.01873e-31	3.08683e-30	59.4848
B3GALT5	-0.73963	3.63081	-12.7664	4.25455e-31	3.26675e-30	59.428
NR3C1	-0.613848	9.69122	-12.7646	4.32415e-31	3.31895e-30	59.4119
ITPRID2	-0.749722	9.34547	-12.7608	4.47136e-31	3.42682e-30	59.3785
TFEC	0.658943	3.15478	12.7533	4.77774e-31	3.66026e-30	59.3126
NCF2	1.37105	8.07609	12.7475	5.03334e-31	3.85033e-30	59.2607
SGMS2	0.991254	6.68835	12.7354	5.60327e-31	4.27994e-30	59.154
MIR100HG	-0.700339	6.02055	-12.7328	5.73261e-31	4.37548e-30	59.1313
RFX5	0.632668	8.10232	12.7321	5.76553e-31	4.39898e-30	59.1256
TP53RK	0.987165	8.34992	12.7307	5.8381e-31	4.45269e-30	59.1131
AARS2	0.809202	8.40925	12.7283	5.96685e-31	4.5492e-30	59.0914
ALOXE3	1.16597	8.70654	12.7267	6.05123e-31	4.6084e-30	59.0774
SLC39A2	1.76241	9.12979	12.7233	6.23376e-31	4.74038e-30	59.0479
TUBB2A	1.1095	10.1267	12.7226	6.27557e-31	4.77041e-30	59.0412
PRF1	1.02222	5.10033	12.7159	6.65721e-31	5.05677e-30	58.9825
TNFRSF11A	0.740604	7.45854	12.7143	6.74996e-31	5.12533e-30	58.9687
SEH1L	0.597089	9.37876	12.7127	6.85091e-31	5.20006e-30	58.9539
TRPM7	-0.612085	6.44407	-12.7118	6.90675e-31	5.23873e-30	58.9459
OSBPL3	0.767594	9.62083	12.705	7.32965e-31	5.55113e-30	58.8867
[truncated: 1,283 more rows]
