# Supplementary material for: Identification and clinical implications of immune-related hub genes in psoriasis
Source: PLoS One. 2026 Apr 20;21(4):e0347536. doi: 10.1371/journal.pone.0347536 (PMC13095007; doi:10.1371/journal.pone.0347536)
Supplement: S3 Table — (XLSX) [file pone.0347536.s004.xlsx]

## Sheet: Table S3
Table S3 513 genes with high connectivity in the blue module as WGCNA hub genes.
Gene	Module	MM_R	MM_pvalue	GS_R	GS_pvalue
A2ML1	blue	0.852354	3.13536e-104	0.795313	6.45202e-81
AAMDC	blue	-0.853783	6.16456e-105	-0.773357	7.64889e-74
ABCA12	blue	0.85825	3.40149e-107	0.780734	3.96684e-76
ABCC1	blue	0.89911	2.6499e-132	0.870006	1.5788e-113
ACOT7	blue	0.823761	1.73252e-91	0.729775	6.46772e-62
ACTR3C	blue	0.809441	6.05879e-86	0.72856	1.2874e-61
ADAMDEC1	blue	0.8357	1.6488e-96	0.830972	1.78934e-94
ADAP2	blue	0.913576	6.53119e-144	0.854287	3.45705e-105
ADRB2	blue	-0.809235	7.22378e-86	-0.779764	8.01808e-76
AEN	blue	0.839604	3.07055e-98	0.732496	1.36556e-62
AFAP1L2	blue	0.853785	6.14549e-105	0.825767	2.64031e-92
AHCY	blue	0.833564	1.39652e-95	0.730549	4.16382e-62
AIMP2	blue	0.807435	3.32283e-85	0.695002	5.92632e-54
AKIRIN2	blue	0.860354	2.76004e-108	0.768748	1.85301e-72
AKR1B10	blue	0.916013	4.56645e-146	0.883456	1.40508e-121
ALAS1	blue	0.804499	3.87166e-84	0.713049	6.14807e-58
ALOX12B	blue	0.834439	5.83921e-96	0.757189	4.0024e-69
AMMECR1	blue	0.888902	3.98569e-125	0.791932	9.00492e-80
AMOTL1	blue	0.859151	1.16516e-107	0.808221	1.70973e-85
AMPD3	blue	0.865444	5.32994e-111	0.779576	9.18398e-76
ANGPTL4	blue	0.804576	3.63192e-84	0.736408	1.41085e-63
APOL1	blue	0.863716	4.579e-110	0.795687	4.80592e-81
APOL6	blue	0.881251	3.41562e-120	0.828568	1.83546e-93
AREG	blue	0.801044	6.59786e-83	0.728662	1.21505e-61
ARF3	blue	0.834352	6.36802e-96	0.740235	1.47213e-64
ARHGEF10	blue	-0.863673	4.82496e-110	-0.792227	7.16741e-80
ARL5B	blue	0.892188	2.33821e-127	0.802945	1.39581e-83
ARL8B	blue	0.829787	5.66381e-94	0.72781	1.96505e-61
ARNTL2	blue	0.943957	7.93862e-177	0.885926	3.63742e-123
ARPC5L	blue	0.891681	5.22021e-127	0.829345	8.68128e-94
ARSF	blue	0.91457	8.77688e-145	0.883765	8.9278e-122
ASF1B	blue	0.840057	1.92029e-98	0.73771	6.56882e-64
ATP10B	blue	0.800018	1.5158e-82	0.788595	1.15759e-78
ATP12A	blue	0.928369	4.14062e-158	0.891167	1.17444e-126
AUNIP	blue	0.831327	1.2647e-94	0.777458	4.2081e-75
AURKA	blue	0.848909	1.47699e-102	0.770627	5.10061e-73
AVEN	blue	0.883211	2.00925e-121	0.762754	1.04914e-70
BAG3	blue	0.833237	1.93046e-95	0.734024	5.65542e-63
BBS2	blue	-0.843705	4.15873e-100	-0.739773	1.93903e-64
BCAR3	blue	-0.88946	1.68403e-125	-0.866118	2.2857e-111
BCL2A1	blue	0.89641	2.47693e-130	0.851777	6.02055e-104
BHLHE41	blue	-0.80245	2.0953e-83	-0.716063	1.2392e-58
BIRC5	blue	0.884918	1.63213e-122	0.789128	7.72179e-79
BLM	blue	0.845503	6.06626e-101	0.792886	4.30049e-80
BLNK	blue	0.838145	1.37835e-97	0.841822	3.04545e-99
BTRC	blue	0.833287	1.83675e-95	0.740036	1.65826e-64
BZW1	blue	0.898242	1.15408e-131	0.785163	1.52504e-77
C10orf99	blue	0.833909	9.90654e-96	0.784814	1.97767e-77
C12orf29	blue	0.862078	3.41982e-109	0.77369	6.05893e-74
C12orf56	blue	0.896936	1.03276e-130	0.858426	2.76126e-107
C14orf119	blue	0.843339	6.13599e-100	0.723808	1.83415e-60
C2orf68	blue	-0.825591	3.11783e-92	-0.738207	4.90253e-64
CARD6	blue	0.859953	4.46796e-108	0.804752	3.13738e-84
CARHSP1	blue	0.847843	4.77287e-102	0.826083	1.96026e-92
CASP1	blue	0.84312	7.74061e-100	0.794166	1.58636e-80
CBFA2T2	blue	-0.817907	3.66434e-89	-0.741792	5.80422e-65
CCL20	blue	0.913468	8.10071e-144	0.859507	7.61811e-108
CCNA2	blue	0.911002	1.05525e-141	0.83621	9.86505e-97
CCNB1	blue	0.909827	1.02098e-140	0.829849	5.33287e-94
CCNB2	blue	0.841971	2.6034e-99	0.782879	8.26773e-77
CCNE1	blue	0.888736	5.14006e-125	0.841133	6.26344e-99
CD24	blue	0.925565	3.3859e-155	0.874046	7.54909e-116
CD274	blue	0.919582	2.40504e-149	0.886015	3.18672e-123
CDCA2	blue	0.836784	5.51662e-97	0.766009	1.19021e-71
CDCA3	blue	0.81151	1.02598e-86	0.738016	5.48548e-64
CDCA5	blue	0.861508	6.83662e-109	0.779579	9.16151e-76
CDCA8	blue	0.830906	1.90812e-94	0.730865	3.47691e-62
CDK1	blue	0.891434	7.7163e-127	0.812306	5.14725e-87
CDK5R1	blue	0.8845	3.02924e-122	0.852688	2.14669e-104
CDKN1A	blue	0.801364	5.08678e-83	0.648618	5.94649e-45
CDKN3	blue	0.848149	3.41227e-102	0.777006	5.8108e-75
CEACAM19	blue	0.807514	3.10921e-85	0.738009	5.50796e-64
CEBPD	blue	0.861188	1.00853e-108	0.753139	5.33011e-68
CEMIP	blue	0.846405	2.28795e-101	0.766249	1.01229e-71
CENPE	blue	0.850449	2.67165e-103	0.79232	6.67151e-80
CENPN	blue	0.902864	3.86762e-135	0.805766	1.34917e-84
CEP126	blue	-0.815508	3.10948e-88	-0.713596	4.6034e-58
CEP55	blue	0.808591	1.25e-85	0.732698	1.21582e-62
CFB	blue	0.851051	1.36215e-103	0.779788	7.87832e-76
CHAC1	blue	0.898769	4.73014e-132	0.818065	3.17933e-89
CHAC2	blue	0.854188	3.87537e-105	0.751901	1.1639e-67
CHEK1	blue	0.873872	9.53475e-116	0.774108	4.51981e-74
CHI3L2	blue	0.862023	3.65634e-109	0.801414	4.88166e-83
CHPT1	blue	-0.825805	2.54873e-92	-0.757165	4.06522e-69
CHRNA9	blue	0.85072	1.97372e-103	0.864145	2.69243e-110
CIRBP	blue	-0.902535	6.93201e-135	-0.828342	2.27978e-93
CKAP4	blue	0.887786	2.19907e-124	0.807137	4.27352e-85
CKMT1B	blue	0.800385	1.12643e-82	0.776321	9.46382e-75
CKS2	blue	0.802784	1.59245e-83	0.74019	1.51219e-64
CLDN8	blue	-0.872138	9.62478e-115	-0.811368	1.15986e-86
CLEC7A	blue	0.902447	8.10077e-135	0.891373	8.49042e-127
CMAHP	blue	-0.801657	4.00523e-83	-0.745219	7.30224e-66
CMPK2	blue	0.827452	5.34006e-93	0.795863	4.182e-81
CNFN	blue	0.847679	5.71141e-102	0.783476	5.32248e-77
CNOT9	blue	0.856846	1.7767e-106	0.720006	1.4771e-59
COQ8A	blue	-0.833888	1.01195e-95	-0.746235	3.92458e-66
CRABP2	blue	0.870458	8.7683e-114	0.845591	5.51586e-101
CRIP1	blue	-0.815326	3.65458e-88	-0.798421	5.47623e-82
CSTA	blue	0.809939	3.96134e-86	0.735983	1.80884e-63
CTPS1	blue	0.850078	4.03836e-103	0.780372	5.15927e-76
CTSC	blue	0.812329	5.04772e-87	0.726447	4.22511e-61
CWH43	blue	0.828417	2.12139e-93	0.769609	1.02767e-72
CXCL1	blue	0.89669	1.55643e-130	0.818549	2.05538e-89
CXCL2	blue	0.828548	1.87095e-93	0.78219	1.37009e-76
CXCL8	blue	0.851716	6.4493e-104	0.778643	1.79913e-75
CXCR2	blue	0.908171	2.37628e-139	0.859406	8.59841e-108
CYP24A1	blue	0.814538	7.32148e-88	0.760122	5.94563e-70
CYP7B1	blue	0.896354	2.71697e-130	0.822561	5.27617e-91
CYSRT1	blue	0.804788	3.04456e-84	0.749892	4.09743e-67
DCUN1D3	blue	0.866751	1.02844e-111	0.783199	6.52943e-77
DDX21	blue	0.866569	1.29404e-111	0.747318	2.01882e-66
DDX28	blue	0.80008	1.44094e-82	0.694903	6.22128e-54
DDX60	blue	0.812764	3.45813e-87	0.759791	7.38567e-70
DEFB103B	blue	0.896406	2.49089e-130	0.840713	9.7064e-99
DEPDC1B	blue	0.886302	2.07251e-123	0.824284	1.06271e-91
DESI1	blue	0.816748	1.03334e-88	0.688077	1.67534e-52
DIAPH3	blue	0.827731	4.09223e-93	0.742592	3.58933e-65
DIMT1	blue	0.832353	4.6227e-95	0.758482	1.73222e-69
DLGAP5	blue	0.89481	3.43893e-129	0.835435	2.15433e-96
DMD	blue	-0.810216	3.12339e-86	-0.745252	7.15752e-66
DNAJC5	blue	0.819954	5.75792e-90	0.752237	9.42101e-68
DPH3	blue	0.808505	1.34465e-85	0.702891	1.17027e-55
DSC2	blue	0.898518	7.24378e-132	0.827368	5.78551e-93
DSG3	blue	0.853144	1.27752e-104	0.812999	2.81827e-87
DTL	blue	0.817382	5.86642e-89	0.697762	1.52282e-54
DTX3L	blue	0.837559	2.50676e-97	0.773877	5.31321e-74
DUSP14	blue	0.811612	9.3931e-87	0.758082	2.24632e-69
EFNB2	blue	-0.831877	7.38014e-95	-0.781084	3.07579e-76
EIF2B2	blue	0.818829	1.59612e-89	0.727924	1.84317e-61
EIF3J	blue	0.868621	9.45986e-113	0.762579	1.17808e-70
EIF4A3	blue	0.867739	2.92897e-112	0.788565	1.18369e-78
EIF4EBP1	blue	0.873897	9.22769e-116	0.791581	1.18073e-79
ELOC	blue	0.84406	2.85106e-100	0.752823	6.50881e-68
EPHA2	blue	0.810129	3.3658e-86	0.760849	3.69103e-70
EPHB2	blue	0.884959	1.53677e-122	0.829924	4.95763e-94
EPHX3	blue	0.805417	1.80476e-84	0.701789	2.04017e-55
EPN3	blue	0.897524	3.86565e-131	0.820046	5.29938e-90
EPOP	blue	0.868629	9.36588e-113	0.817387	5.84193e-89
EPSTI1	blue	0.881056	4.51457e-120	0.865524	4.82404e-111
ERO1A	blue	0.835594	1.83566e-96	0.74815	1.20807e-66
ESYT3	blue	0.820605	3.18233e-90	0.778392	2.15552e-75
EXO1	blue	0.811782	8.10694e-87	0.709267	4.45676e-57
EXOSC3	blue	0.827824	3.74427e-93	0.700898	3.19173e-55
FABP5	blue	0.865899	3.01287e-111	0.836048	1.16106e-96
FAM110C	blue	0.897043	8.63585e-131	0.872703	4.5496e-115
FAM117A	blue	-0.828344	2.27548e-93	-0.748931	7.44668e-67
FAM13A	blue	-0.886406	1.7711e-123	-0.770377	6.0583e-73
FAM160A1	blue	0.813228	2.30642e-87	0.743826	1.70277e-65
FAM43A	blue	0.926806	1.79941e-156	0.871849	1.41173e-114
FAM83A	blue	0.925367	5.38449e-155	0.86184	4.56704e-109
FAM83D	blue	0.861354	8.24563e-109	0.778878	1.51895e-75
FBXO45	blue	0.831681	8.94646e-95	0.794041	1.7491e-80
FBXO6	blue	0.876449	2.87892e-117	0.795831	4.29131e-81
FCHSD1	blue	0.894901	2.96452e-129	0.860826	1.56299e-108
FGD4	blue	-0.8272	6.7876e-93	-0.773554	6.66233e-74
FGFBP1	blue	0.818674	1.83686e-89	0.724665	1.141e-60
FLVCR2	blue	0.928104	7.88454e-158	0.887353	4.24066e-124
FOSL1	blue	0.853988	4.87111e-105	0.771637	2.53498e-73
FOXE1	blue	0.916854	7.9446e-147	0.875148	1.7013e-116
FST	blue	-0.845969	3.66745e-101	-0.763971	4.66951e-71
FUT2	blue	0.903169	2.24931e-135	0.827036	7.93544e-93
FUT3	blue	0.90708	1.83034e-138	0.885538	6.50149e-123
GALNT6	blue	0.905472	3.54309e-137	0.833989	9.15169e-96
GBA	blue	0.89799	1.76739e-131	0.847502	6.92661e-102
GBAP1	blue	0.907842	4.41047e-139	0.866145	2.21093e-111
GBP1	blue	0.8109	1.73607e-86	0.812402	4.73681e-87
GDA	blue	0.885988	3.31675e-123	0.869968	1.65987e-113
GDPD3	blue	0.873315	2.01299e-115	0.837635	2.32028e-97
GFOD2	blue	0.889862	9.03663e-126	0.853372	9.85718e-105
GGH	blue	0.848304	2.87701e-102	0.770442	5.7947e-73
GINS2	blue	0.836268	9.30331e-97	0.738134	5.11634e-64
GINS3	blue	0.914943	4.10875e-145	0.875495	1.06118e-116
GJA3	blue	0.804	5.85198e-84	0.755411	1.2549e-68
GJB2	blue	0.893275	4.12086e-128	0.887539	3.20222e-124
GJB6	blue	0.869986	1.62092e-113	0.86499	9.41275e-111
GK	blue	0.869591	2.70652e-113	0.786242	6.81456e-78
GK3P	blue	0.885494	6.94075e-123	0.805064	2.42132e-84
GLRX3	blue	0.807938	2.17347e-85	0.727223	2.7339e-61
GLUL	blue	0.820446	3.67877e-90	0.741696	6.14938e-65
GM2A	blue	0.906106	1.10845e-137	0.83544	2.14364e-96
GMFB	blue	0.802063	2.87442e-83	0.710215	2.72018e-57
GNA15	blue	0.89978	8.41824e-133	0.792396	6.29107e-80
GPC4	blue	-0.820884	2.46669e-90	-0.735073	3.07594e-63
GPD1L	blue	-0.814599	6.93637e-88	-0.780548	4.53963e-76
GPR68	blue	0.907302	1.21151e-138	0.851078	1.32069e-103
GPT2	blue	0.809142	7.81828e-86	0.752593	7.52729e-68
GRHL3	blue	0.873224	2.2722e-115	0.794997	8.27479e-81
GTF3C6	blue	0.890274	4.75588e-126	0.846266	2.65845e-101
GTPBP2	blue	0.821358	1.59688e-90	0.793308	3.09857e-80
GZMB	blue	0.924386	5.2564e-154	0.895564	1.00027e-129
H2AFX	blue	0.820196	4.62092e-90	0.743521	2.04824e-65
HAL	blue	0.824824	6.41518e-92	0.792626	5.26192e-80
HAS3	blue	0.839464	3.55007e-98	0.765017	2.31911e-71
HBEGF	blue	0.867083	6.74912e-112	0.798736	4.25193e-82
HDAC1	blue	0.888675	5.64892e-125	0.797768	9.22403e-82
HDGF	blue	0.825775	2.62219e-92	0.726616	3.84196e-61
HEATR3	blue	0.846848	1.41424e-101	0.733295	8.62025e-63
HELZ2	blue	0.901751	2.75808e-134	0.838984	5.8196e-98
HERC6	blue	0.894441	6.26283e-129	0.860547	2.18813e-108
HMMR	blue	0.812884	3.11328e-87	0.719403	2.04954e-59
HMOX2	blue	0.897277	5.84277e-131	0.828298	2.37852e-93
HPSE	blue	0.929931	8.75077e-160	0.871208	3.28036e-114
HS3ST3A1	blue	0.834702	4.4915e-96	0.782461	1.12397e-76
HSPA4L	blue	0.85147	8.50545e-104	0.762346	1.37505e-70
HSPE1	blue	0.904764	1.28415e-136	0.80028	1.22567e-82
HUS1	blue	0.8434	5.74979e-100	0.72115	7.91514e-60
HYAL4	blue	0.906726	3.53124e-138	0.906525	5.12128e-138
ID4	blue	-0.905494	3.40533e-137	-0.841391	4.78223e-99
IFI6	blue	0.841512	4.21179e-99	0.785817	9.36332e-78
IFIT3	blue	0.825031	5.27865e-92	0.793356	2.98381e-80
IGFL1	blue	0.896378	2.60896e-130	0.853635	7.29478e-105
IL13RA1	blue	0.809558	5.48694e-86	0.722666	3.44567e-60
IL19	blue	0.802171	2.63175e-83	0.70012	4.71344e-55
IL36B	blue	0.857261	1.09112e-106	0.80024	1.26598e-82
IL36G	blue	0.900121	4.68608e-133	0.861865	4.4325e-109
IL36RN	blue	0.867055	6.99374e-112	0.800128	1.3869e-82
IL4R	blue	0.846141	3.04485e-101	0.79239	6.31758e-80
INA	blue	0.921436	4.14993e-151	0.876219	3.94533e-117
IRAK1	blue	0.812555	4.14771e-87	0.73923	2.67642e-64
IRAK2	blue	0.88092	5.49071e-120	0.82304	3.38505e-91
IRF1	blue	0.810996	1.59737e-86	0.785131	1.56178e-77
IRF7	blue	0.893575	2.5452e-128	0.839374	3.89603e-98
ISG15	blue	0.825735	2.72228e-92	0.810587	2.27263e-86
ISG20	blue	0.882274	7.83773e-121	0.811793	8.03108e-87
ITM2A	blue	-0.821778	1.08561e-90	-0.760902	3.56516e-70
JADE1	blue	-0.921574	3.05362e-151	-0.857183	1.19569e-106
JMY	blue	0.803962	6.03707e-84	0.769904	8.38924e-73
KCNJ15	blue	0.891464	7.36136e-127	0.824665	7.44169e-92
KCNK6	blue	0.881939	1.27102e-120	0.80765	2.77252e-85
KDM7A-DT	blue	0.800527	1.00368e-82	0.700205	4.51742e-55
KIF18B	blue	0.812258	5.36714e-87	0.740308	1.40997e-64
KIF20A	blue	0.85137	9.51786e-104	0.795438	5.8492e-81
KIF2A	blue	0.839823	2.44813e-98	0.763264	7.47677e-71
KIF4A	blue	0.81065	2.15165e-86	0.707962	8.75998e-57
KLK10	blue	0.902582	6.37449e-135	0.829227	9.7282e-94
KLK13	blue	0.941387	2.14284e-173	0.892069	2.82442e-127
KLK6	blue	0.8344	6.07185e-96	0.761419	2.53697e-70
KPNA2	blue	0.884737	2.13493e-122	0.809318	6.72996e-86
KRT16	blue	0.912561	4.94414e-143	0.875772	7.2736e-117
KRT6A	blue	0.851026	1.40073e-103	0.806286	8.73135e-85
KRT6B	blue	0.827031	7.9748e-93	0.784834	1.94808e-77
KRT77	blue	-0.896218	3.40534e-130	-0.84649	2.08593e-101
KYNU	blue	0.949926	1.82413e-185	0.937891	5.72225e-169
LAMP3	blue	0.826046	2.02899e-92	0.760422	4.8837e-70
LCE3D	blue	0.823774	1.71142e-91	0.764499	3.28142e-71
LCN2	blue	0.857243	1.11462e-106	0.817034	8.00864e-89
LDLR	blue	0.817654	4.59643e-89	0.72262	3.53418e-60
LFNG	blue	-0.812935	2.97881e-87	-0.74294	2.90866e-65
LGALS3BP	blue	0.805031	2.48918e-84	0.744327	1.25653e-65
LINC01094	blue	0.899648	1.05501e-132	0.847804	4.97783e-102
LINC01214	blue	0.821029	2.15839e-90	0.779663	8.62637e-76
LINC01550	blue	-0.845099	9.36517e-101	-0.802924	1.42025e-83
LINC01806	blue	0.858728	1.92919e-107	0.777231	4.94995e-75
LMNB2	blue	0.802943	1.39843e-83	0.705466	3.15946e-56
LOC100506411	blue	0.85703	1.43186e-106	0.792345	6.54073e-80
LONRF1	blue	-0.839196	4.67737e-98	-0.761519	2.37404e-70
LRG1	blue	0.835903	1.34482e-96	0.75957	8.53311e-70
LRP8	blue	0.8973	5.62174e-131	0.840129	1.78202e-98
LYN	blue	0.857537	7.89202e-107	0.834153	7.77006e-96
LYPD5	blue	0.828569	1.83297e-93	0.783877	3.95838e-77
LYRM9	blue	-0.823113	3.16293e-91	-0.708613	6.25488e-57
MAGI1	blue	-0.844951	1.09779e-100	-0.756077	8.18907e-69
MALT1	blue	0.84377	3.88103e-100	0.762668	1.11092e-70
MAML2	blue	-0.813682	1.55078e-87	-0.743234	2.43644e-65
MAP3K9	blue	0.860417	2.55791e-108	0.786899	4.16444e-78
MAPK13	blue	0.834755	4.2582e-96	0.739709	2.0132e-64
MAPK14	blue	0.826623	1.17558e-92	0.778236	2.41125e-75
MATN2	blue	-0.854488	2.74445e-105	-0.787181	3.36883e-78
MCFD2	blue	0.821196	1.85349e-90	0.71027	2.64345e-57
MCL1	blue	0.823707	1.82111e-91	0.753338	4.69827e-68
MCUB	blue	0.838627	8.40624e-98	0.758786	1.42179e-69
MED8	blue	0.829892	5.11657e-94	0.744963	8.53811e-66
MELK	blue	0.885459	7.31314e-123	0.81172	8.55493e-87
METAP1	blue	0.812153	5.87963e-87	0.765203	2.04582e-71
MICALL1	blue	0.906123	1.07493e-137	0.839493	3.44458e-98
MKI67	blue	0.884027	6.07856e-122	0.80151	4.51699e-83
MLXIP	blue	-0.805268	2.04347e-84	-0.782596	1.01763e-76
MPHOSPH6	blue	0.866539	1.34446e-111	0.846657	1.74013e-101
MPZL2	blue	0.932157	3.06705e-162	0.881078	4.37638e-120
MRPS17	blue	0.851321	1.00514e-103	0.712788	7.05779e-58
MTURN	blue	-0.903626	9.95887e-136	-0.837927	1.72126e-97
MX1	blue	0.902972	3.19431e-135	0.873571	1.42865e-115
MXD1	blue	0.900889	1.24014e-133	0.831308	1.28873e-94
MYD88	blue	0.880864	5.94459e-120	0.803265	1.07299e-83
MYO1B	blue	0.817415	5.69548e-89	0.760215	5.59538e-70
MYO1E	blue	0.810647	2.15703e-86	0.694632	7.09943e-54
N4BP1	blue	0.895932	5.4562e-130	0.841712	3.41532e-99
NAMPT	blue	0.890131	5.94803e-126	0.838275	1.20632e-97
NDC1	blue	0.808285	1.61999e-85	0.706376	1.9827e-56
NDC80	blue	0.832581	3.69175e-95	0.785043	1.66782e-77
NDUFAF2	blue	0.81886	1.55293e-89	0.737545	7.24093e-64
NETO2	blue	0.868391	1.27128e-112	0.815025	4.76495e-88
NFE2L3	blue	0.813593	1.67724e-87	0.73973	1.98916e-64
NIPAL4	blue	0.839043	5.4779e-98	0.754937	1.69879e-68
NLRX1	blue	0.928053	8.92595e-158	0.864908	1.04166e-110
NMI	blue	0.850371	2.91506e-103	0.81593	2.13878e-88
NOD2	blue	0.88083	6.24014e-120	0.83157	9.9759e-95
NPY1R	blue	-0.820339	4.05789e-90	-0.707706	9.99749e-57
NR3C2	blue	-0.877361	8.19295e-118	-0.782849	8.4499e-77
NT5C3A	blue	0.879005	8.27439e-119	0.838828	6.83892e-98
NUDT22	blue	0.806616	6.62081e-85	0.748223	1.15489e-66
NUP50-DT	blue	0.824263	1.08435e-91	0.71382	4.08893e-58
OAS1	blue	0.898299	1.04958e-131	0.847085	1.09269e-101
OAS2	blue	0.911408	4.78195e-142	0.861438	7.44297e-109
OAS3	blue	0.905867	1.71825e-137	0.831926	7.03567e-95
OASL	blue	0.933149	2.32442e-163	0.900871	1.27995e-133
OLFML2A	blue	-0.822996	3.52489e-91	-0.754724	1.94675e-68
OSBPL1A	blue	-0.827226	6.62646e-93	-0.726796	3.47478e-61
OTUB2	blue	0.870274	1.11458e-113	0.838305	1.16896e-97
OVOL1	blue	0.899085	2.76302e-132	0.787491	2.66689e-78
PANX1	blue	0.823154	3.04511e-91	0.713309	5.36042e-58
PAPLN	blue	-0.862754	1.49644e-109	-0.787537	2.57658e-78
PARP9	blue	0.855697	6.78374e-106	0.827731	4.09138e-93
PARPBP	blue	0.821075	2.06977e-90	0.72576	6.20338e-61
PBK	blue	0.870352	1.00636e-113	0.787836	2.05539e-78
PDCD4	blue	-0.815747	2.51566e-88	-0.731522	2.38869e-62
PDS5A	blue	0.827562	4.80634e-93	0.709525	3.8959e-57
PGAM1	blue	0.886356	1.91141e-123	0.766651	7.71197e-72
PGBD5	blue	0.856599	2.37252e-106	0.802205	2.56082e-83
PGLYRP4	blue	0.905481	3.48288e-137	0.854605	2.39855e-105
PGM2	blue	0.906027	1.28262e-137	0.830973	1.7883e-94
PHF3	blue	-0.839775	2.57332e-98	-0.761529	2.35921e-70
PHLDA2	blue	0.86904	5.51367e-113	0.750935	2.13523e-67
PI3	blue	0.906705	3.67209e-138	0.882929	3.02865e-121
PLA2G4D	blue	0.930783	1.02739e-160	0.884443	3.29344e-122
PLAGL2	blue	0.891348	8.8305e-127	0.812339	5.00309e-87
PLAT	blue	0.810066	3.55254e-86	0.756657	5.64003e-69
PLBD1	blue	0.888004	1.57686e-124	0.860825	1.56361e-108
PLCD1	blue	0.800724	8.55439e-83	0.791818	9.82946e-80
PLCXD1	blue	0.86403	3.10538e-110	0.808045	1.98483e-85
PLSCR1	blue	0.80308	1.24869e-83	0.763125	8.20355e-71
PNP	blue	0.932726	7.01773e-163	0.856138	4.06338e-106
POLE2	blue	0.818665	1.85099e-89	0.745647	5.62626e-66
POLR3G	blue	0.854367	3.15509e-105	0.810114	3.41022e-86
POR	blue	0.840279	1.52534e-98	0.750247	3.28266e-67
POU6F1	blue	-0.800484	1.0391e-82	-0.699073	7.94438e-55
PPARD	blue	0.910049	6.66774e-141	0.862074	3.43668e-109
PPIF	blue	0.860536	2.21546e-108	0.801455	4.72258e-83
PPP4R1	blue	0.838544	9.15401e-98	0.782176	1.38468e-76
PRDM1	blue	0.863872	3.77351e-110	0.796198	3.20999e-81
PRELID1	blue	0.896617	1.75533e-130	0.790856	2.06179e-79
PRKCQ	blue	0.889662	1.23174e-125	0.857376	9.53711e-107
PRKCQ-AS1	blue	0.842446	1.57847e-99	0.822204	7.33052e-91
PRMT5	blue	0.833398	1.64582e-95	0.716486	9.87995e-59
PRSS2	blue	0.890459	3.56414e-126	0.794019	1.7793e-80
PRSS22	blue	0.806539	7.06232e-85	0.725859	5.86884e-61
PRSS27	blue	0.952397	2.34919e-189	0.918926	9.89002e-149
PRSS3	blue	0.858765	1.84586e-107	0.762346	1.37502e-70
PRSS3P2	blue	0.885496	6.91132e-123	0.79183	9.73871e-80
PSMC4	blue	0.889786	1.01681e-125	0.802791	1.58452e-83
PSMD1	blue	0.850424	2.7475e-103	0.725198	8.48063e-61
PSME3	blue	0.895805	6.72451e-130	0.766349	9.46084e-72
PTAFR	blue	0.816718	1.06152e-88	0.777024	5.73536e-75
PTTG1	blue	0.877736	4.86533e-118	0.81897	1.40531e-89
PUDP	blue	0.846764	1.54911e-101	0.769189	1.37052e-72
PUSL1	blue	0.83131	1.28642e-94	0.770738	4.7231e-73
RAB10	blue	0.91937	3.80938e-149	0.8297	6.15879e-94
RAB27A	blue	0.926918	1.37791e-156	0.862373	2.38538e-109
RAB27B	blue	0.860825	1.56407e-108	0.816976	8.43403e-89
RAB35	blue	0.867588	3.55142e-112	0.762826	1.00051e-70
RAB38	blue	0.873669	1.25319e-115	0.76614	1.08915e-71
RAB5IF	blue	0.938559	8.53335e-170	0.865403	5.61292e-111
RABGGTA	blue	0.889362	1.95908e-125	0.826013	2.0938e-92
RABIF	blue	0.915963	5.06408e-146	0.837076	4.10066e-97
RALA	blue	0.822729	4.51516e-91	0.720404	1.18965e-59
RASGRP1	blue	0.826865	9.3424e-93	0.752627	7.36616e-68
RCC1	blue	0.815688	2.65216e-88	0.7426	3.57115e-65
RDH16	blue	0.903141	2.36823e-135	0.848217	3.16348e-102
RETREG1	blue	-0.801671	3.9595e-83	-0.797704	9.70848e-82
RGS1	blue	0.844964	1.08319e-100	0.801825	3.49323e-83
RGS20	blue	0.937188	4.13161e-168	0.887922	1.78559e-124
RHCG	blue	0.908119	2.62137e-139	0.886131	2.6774e-123
RHOBTB3	blue	-0.86571	3.82232e-111	-0.819662	7.51151e-90
RHOG	blue	0.817346	6.05819e-89	0.698	1.35388e-54
RIT1	blue	0.817806	4.01019e-89	0.741309	7.75538e-65
RORC	blue	-0.842354	1.73906e-99	-0.829072	1.12948e-93
RPL23AP32	blue	-0.806089	1.02994e-84	-0.703023	1.09442e-55
RPL26L1	blue	0.868382	1.28574e-112	0.799402	2.49009e-82
RPL37	blue	-0.827994	3.18324e-93	-0.737777	6.31486e-64
RPP40	blue	0.840413	1.32672e-98	0.734542	4.18761e-63
RRM2	blue	0.928445	3.43868e-158	0.847348	8.19579e-102
RSAD2	blue	0.861867	4.4183e-109	0.821834	1.0309e-90
RSC1A1	blue	0.8373	3.263e-97	0.7599	6.87375e-70
RTP4	blue	0.871829	1.44978e-114	0.832068	6.11526e-95
S100A12	blue	0.961111	6.04528e-205	0.951773	2.36319e-188
S100A16	blue	0.834672	4.62905e-96	0.738084	5.26895e-64
S100A7A	blue	0.919798	1.5081e-149	0.902807	4.28326e-135
S100A8	blue	0.805987	1.1212e-84	0.788841	9.60544e-79
S100A9	blue	0.872579	5.36721e-115	0.861613	6.01775e-109
SAMD9	blue	0.919538	2.64842e-149	0.888052	1.46552e-124
SCD5	blue	-0.856365	3.11696e-106	-0.797927	8.12408e-82
SCO2	blue	0.862668	1.66226e-109	0.822043	8.51014e-91
SERPINA1	blue	0.847416	7.61511e-102	0.797801	8.98702e-82
SERPINB1	blue	0.855774	6.20657e-106	0.79627	3.03214e-81
SERPINB13	blue	0.930988	6.10872e-161	0.899195	2.29103e-132
SERPINB3	blue	0.90398	5.2847e-136	0.886205	2.39616e-123
SERPINB4	blue	0.94109	5.21063e-173	0.927307	5.41123e-157
SERTAD1	blue	0.838339	1.12932e-97	0.75609	8.12094e-69
SESN2	blue	0.812104	6.13514e-87	0.760809	3.78839e-70
SFN	blue	0.825669	2.89793e-92	0.725033	9.29988e-61
SFT2D2	blue	0.912782	3.18937e-143	0.833159	2.08529e-95
SH3PXD2A-AS1	blue	0.88386	7.7701e-122	0.819138	1.20739e-89
SHB	blue	0.866577	1.28065e-111	0.79391	1.93761e-80
SHC1	blue	0.85708	1.34934e-106	0.766726	7.32981e-72
SHFL	blue	0.814286	9.13804e-88	0.778969	1.42292e-75
SHOC1	blue	0.872787	4.06983e-115	0.830735	2.25569e-94
SHROOM2	blue	0.828723	1.58175e-93	0.749239	6.15092e-67
SKA2	blue	0.884301	4.0609e-122	0.817064	7.79794e-89
SLAMF7	blue	0.895397	1.31663e-129	0.827923	3.40541e-93
SLC16A6	blue	0.819898	6.05879e-90	0.786101	7.57201e-78
SLC26A9	blue	0.934122	1.77751e-164	0.868854	7.01465e-113
SLC2A1	blue	0.844305	2.19364e-100	0.764175	4.07492e-71
SLC30A9	blue	0.821373	1.57538e-90	0.741973	5.20834e-65
SLC35B1	blue	0.809508	5.72335e-86	0.715924	1.3352e-58
SLC35E4	blue	0.815749	2.51121e-88	0.76601	1.18866e-71
SLC5A1	blue	0.893344	3.68917e-128	0.806524	7.14966e-85
SLC6A14	blue	0.87816	2.69778e-118	0.848108	3.56889e-102
SLC7A11	blue	0.881884	1.3761e-120	0.829837	5.39441e-94
SMAGP	blue	0.809497	5.77832e-86	0.795147	7.35318e-81
SMOX	blue	0.821243	1.77517e-90	0.770872	4.30621e-73
SMPD3	blue	0.82684	9.56122e-93	0.775286	1.96956e-74
SNCA	blue	-0.802003	3.01903e-83	-0.735512	2.3812e-63
SNRPN	blue	-0.847491	7.01251e-102	-0.750182	3.41874e-67
SOD2	blue	0.847548	6.59189e-102	0.788958	8.78771e-79
SOX7	blue	0.842904	9.73313e-100	0.848889	1.51035e-102
SPC25	blue	0.853483	8.68734e-105	0.780671	4.15178e-76
SPCS3	blue	0.856856	1.75567e-106	0.73761	6.96789e-64
SPRR2B	blue	0.84269	1.22061e-99	0.791781	1.01147e-79
SPRR2C	blue	0.952412	2.22235e-189	0.924095	1.02838e-153
SPRR3	blue	0.834415	5.98355e-96	0.747801	1.49898e-66
SPRYD4	blue	0.817099	7.55518e-89	0.685632	5.33083e-52
SPTLC2	blue	0.868539	1.05213e-112	0.832674	3.36796e-95
SQLE	blue	0.847264	8.98235e-102	0.769029	1.52882e-72
SQOR	blue	0.855847	5.69643e-106	0.769971	8.01093e-73
SRM	blue	0.837563	2.49774e-97	0.722205	4.43989e-60
SRXN1	blue	0.803027	1.30454e-83	0.728592	1.26463e-61
SSBP2	blue	-0.82512	4.85724e-92	-0.783862	4.00352e-77
STAM	blue	0.81129	1.24033e-86	0.71545	1.71902e-58
STAT1	blue	0.884455	3.23782e-122	0.853382	9.74377e-105
STIL	blue	0.88655	1.42647e-123	0.829716	6.06533e-94
STUM	blue	-0.813775	1.42959e-87	-0.769155	1.40255e-72
STX6	blue	0.852971	1.55628e-104	0.757713	2.85289e-69
STYK1	blue	0.83233	4.72662e-95	0.776942	6.0807e-75
SYNCRIP	blue	0.894738	3.86356e-129	0.776134	1.08085e-74
SYNE1	blue	-0.80303	1.30174e-83	-0.731671	2.19326e-62
TAP2	blue	0.81606	1.90694e-88	0.751159	1.85503e-67
TC2N	blue	0.801471	4.66265e-83	0.788957	8.79417e-79
TCN1	blue	0.937537	1.5516e-168	0.921768	1.98438e-151
TEX101	blue	0.851661	6.85904e-104	0.807104	4.39162e-85
TFDP1	blue	0.860794	1.62432e-108	0.786029	7.99335e-78
TGM1	blue	0.953441	4.62186e-191	0.901646	3.30995e-134
TIGAR	blue	0.889578	1.40378e-125	0.796134	3.37851e-81
TJP1	blue	0.868068	1.92245e-112	0.775328	1.91296e-74
TK1	blue	0.839637	2.96635e-98	0.765062	2.24901e-71
TLE3	blue	0.935767	2.10296e-166	0.864901	1.05144e-110
TMC5	blue	0.916608	1.329e-146	0.871655	1.82395e-114
TMEM171	blue	0.813775	1.43019e-87	0.744602	1.06345e-65
TMEM45B	blue	0.905382	4.17212e-137	0.825701	2.81047e-92
TMEM54	blue	0.843224	6.9361e-100	0.726685	3.69757e-61
TMEM79	blue	0.839743	2.65827e-98	0.768932	1.63473e-72
TMEM86A	blue	0.80738	3.48249e-85	0.778954	1.43823e-75
TMPRSS11D	blue	0.943436	4.05337e-176	0.936084	8.81135e-167
TMPRSS4	blue	0.910272	4.33875e-141	0.84777	5.17061e-102
TNFAIP1	blue	0.867109	6.52705e-112	0.764269	3.82619e-71
TNFRSF21	blue	0.823741	1.76513e-91	0.781933	1.65487e-76
TNFRSF4	blue	0.814164	1.01651e-87	0.771923	2.07911e-73
TNIP3	blue	0.802163	2.64897e-83	0.712914	6.60125e-58
TOMM40L	blue	0.846039	3.4019e-101	0.791584	1.17761e-79
TOMM5	blue	0.846468	2.13761e-101	0.730361	4.63306e-62
TPRXL	blue	0.800601	9.4529e-83	0.751749	1.28077e-67
TPX2	blue	0.843405	5.7192e-100	0.773462	7.10632e-74
TRIM10	blue	0.816152	1.75734e-88	0.782038	1.53157e-76
TRIM14	blue	0.903048	2.78989e-135	0.828002	3.15717e-93
TRIM69	blue	0.803143	1.18586e-83	0.751825	1.22119e-67
TRIP13	blue	0.869968	1.6585e-113	0.788598	1.15433e-78
TTC1	blue	0.807802	2.43771e-85	0.672322	2.39256e-49
TTC39A	blue	0.91193	1.71782e-142	0.841546	4.06634e-99
TTC9	blue	0.921518	3.46094e-151	0.812124	6.03025e-87
TTK	blue	0.867606	3.47086e-112	0.788836	9.64087e-79
TUBG1	blue	0.84931	9.47635e-103	0.745293	6.98267e-66
TXNDC17	blue	0.815932	2.13641e-88	0.778247	2.39124e-75
TYMP	blue	0.853324	1.04065e-104	0.832816	2.92776e-95
UBE2F	blue	0.970319	7.06308e-226	0.883925	7.0605e-122
UBE2L6	blue	0.868853	7.02048e-113	0.820703	2.91058e-90
UBE3C	blue	0.867895	2.39864e-112	0.77208	1.86439e-73
UCHL3	blue	0.897963	1.85015e-131	0.812854	3.19628e-87
ULBP2	blue	0.886015	3.18595e-123	0.793081	3.69611e-80
UPP1	blue	0.901557	3.87134e-134	0.858615	2.20569e-107
USP6NL	blue	0.855847	5.69618e-106	0.775954	1.22781e-74
VCP	blue	0.871873	1.36637e-114	0.77662	7.65068e-75
VMP1	blue	0.8642	2.51424e-110	0.830375	3.20068e-94
VNN1	blue	0.888158	1.24647e-124	0.883886	7.47508e-122
VNN3	blue	0.950254	5.70714e-186	0.910389	3.46276e-141
VPS13C	blue	-0.828473	2.01118e-93	-0.733371	8.25006e-63
VSIG10L	blue	0.822542	5.36792e-91	0.771783	2.29095e-73
WARS	blue	0.836072	1.13326e-96	0.76095	3.45288e-70
WDR53	blue	0.859139	1.18234e-107	0.812089	6.21456e-87
WDR77	blue	0.910422	3.25044e-141	0.820344	4.03685e-90
WNT5A	blue	0.880808	6.43464e-120	0.859533	7.39157e-108
WWTR1	blue	0.838311	1.16227e-97	0.800943	7.16493e-83
XAF1	blue	0.806665	6.3532e-85	0.791854	9.56328e-80
XDH	blue	0.884466	3.18641e-122	0.826745	1.04708e-92
ZBED2	blue	0.814767	5.98276e-88	0.768133	2.82077e-72
ZBTB20	blue	-0.922266	6.53063e-152	-0.814907	5.2898e-88
ZBTB8OS	blue	0.80936	6.49566e-86	0.732531	1.33807e-62
ZC3H12A	blue	0.930776	1.04653e-160	0.889787	1.01454e-125
ZNF165	blue	0.87421	6.05566e-116	0.760987	3.37107e-70
ZNF224	blue	-0.805145	2.26332e-84	-0.684095	1.09728e-51
ZNF557	blue	0.804621	3.49706e-84	0.716135	1.19237e-58
ZNF677	blue	-0.802232	2.50417e-83	-0.784961	1.77252e-77
ZNF766	blue	-0.801766	3.66384e-83	-0.71794	4.52318e-59
ZNF790-AS1	blue	-0.834663	4.669e-96	-0.796907	1.83083e-81
ZWILCH	blue	0.815566	2.95412e-88	0.744436	1.17609e-65
