# Supplementary material for: Identification and clinical implications of immune-related hub genes in psoriasis
Source: PLoS One. 2026 Apr 20;21(4):e0347536. doi: 10.1371/journal.pone.0347536 (PMC13095007; doi:10.1371/journal.pone.0347536)
Supplement: S4 Table — (XLSX) [file pone.0347536.s005.xlsx]

## Sheet: Table S4
Table S4 31 immune-key genes related to psoriasis
immune-key genes related to LS
BIRC5
CCL20
CCNA2
CCNB1
CDK5R1
CDKN3
CLEC7A
CXCL1
CXCR2
DUSP14
EXO1
FABP5
FOSL1
FST
GM2A
GPT2
HAL
IL4R
IRF1
LAMP3
PSMC4
RAB27B
RAB38
RGS1
S100A12
S100A8
S100A9
SPCS3
UPP1
VNN1
VNN3
